# Supplementary material for: Phosphoproteomics Profiling of Human Skin Fibroblast Cells Reveals Pathways and Proteins Affected by Low Doses of Ionizing Radiation
Source: PLoS One. 2010 Nov 30;5(11):e14152. doi: 10.1371/journal.pone.0014152 (PMC2994767; doi:10.1371/journal.pone.0014152)
Supplement: Table S1 — Shown is the complete list of identified phosphopeptides. (6.92 MB XLS) [file pone.0014152.s002.xls]

## Sheet: pt5FDR_Ascore
Supplementary Table 1. Phosphopeptides identified with false discovery rate≤0.5% (q≤0.005). Ascore is shown for each individual phosphorylation sites in the pepitde. Ascore of -1 means not applicable.
Dataset	ScanNumber	ScanCount	ChargeState	XCorr	Sp	DeltaCn2	newDeltaCn2	ppmDelM	q	seq_top	TopPeptideScore	AScore1	AScore2	AScore3
Lowdose_2rad_IMAC_MSA1	7485	1	3	7.8437	701.5	0.525262	0.72475	6.38712	0	GKGGVTGS*PEASISGS*KGDLK	820.507	15.3994	59.7937	-1
Lowdose_2rad_IMAC_MSA1	9960	1	3	7.7866	331.2	0.671513	0.819459	1.03063	0	AHS*SPASLQLGAVSPGTLTPTGVVSGPAATPTAQHLR	2111.22	46.5836	-1	-1
Lowdose_2rad_IMAC_MSA1	10788	1	3	7.6283	473.6	0.615091	0.784277	3.5748	0	GLLAQGLRPES*PPPAGPLLNGAPAGESPQPK	2568.93	253.114	-1	-1
Lowdose_2rad_IMAC_MSA1	12866	1	3	7.6208	599.1	0.555139	0.745077	3.66284	0	RSDS*PEIPFQAAAGPSDGLDASSPGNSFVGLR	1782.27	0	-1	-1
Lowdose_2rad_IMAC_MSA1	10900	1	3	7.0439	665.1	0.575675	0.758732	6.07401	0	KSLDS*DES*EDEEDDYQQKR	1348.52	50.9129	50.9129	-1
Lowdose_2rad_IMAC_MSA1	8222	1	3	6.9561	676.7	0.515691	0.718116	3.73222	0	SAAS*REDLVGPEVGAS*PQSGRK	1091.34	0	19.1644	-1
Lowdose_2rad_IMAC_MSA1	12431	1	3	6.9411	754.9	0.576839	0.759499	4.15842	0	SFGTRPLS*SGFSPEEAQQQDEEFEK	2810.54	71.078	-1	-1
Lowdose_2rad_IMAC_MSA1	9863	1	3	6.9325	484.8	0.471547	0.686693	-2.77132	0	RAS*AGPAPGPVVTAEGLHPSLPSPTGNSTPLGSSK	954.815	41.6145	-1	-1
Lowdose_2rad_IMAC_MSA1	9859	1	3	6.8549	384.9	0.429095	0.655053	-3.7382	3e-06	RAS*AGPAPGPVVTAEGLHPSLPSPTGNSTPLGSSK	1057.81	54.9444	-1	-1
Lowdose_2rad_IMAC_MSA1	15283	1	3	6.8376	692	0.502925	0.709172	3.42243	0	ERPIS*LGIFPLPAGDGLLTPDAQK	1773.3	227.122	-1	-1
Lowdose_2rad_IMAC_MSA1	11880	1	3	6.831	1327	0.576533	0.759298	5.72308	0	PGLRPAPNS*VDVDDFINTR	2907.28	145.575	-1	-1
Lowdose_2rad_IMAC_MSA1	7812	1	3	6.7875	952.2	0.525392	0.724839	5.72424	0	SRPFTVAASFQSTSVKS*PK	1530.03	61.5698	-1	-1
Lowdose_2rad_IMAC_MSA1	8490	1	3	6.7864	586.4	0.458137	0.676858	5.12816	0	RDS*LGAYASQDANEQGQDLGKR	1781.76	74.3267	-1	-1
Lowdose_2rad_IMAC_MSA1	10795	1	3	6.7864	481.9	0.522855	0.723087	2.52339	0	GLLAQGLRPES*PPPAGPLLNGAPAGESPQPK	2158.87	208.512	-1	-1
Lowdose_2rad_IMAC_MSA1	7006	1	3	6.7679	723.9	0.533622	0.730494	5.86655	0	GKGGVTGSPEASISGS*KGDLK	1616.59	25.8184	-1	-1
Lowdose_2rad_IMAC_MSA1	6553	1	3	6.741	771.5	0.536063	0.732163	5.01803	0	GVHIHQAGGS*PPASSTSSSSLTNDVAK	2311.74	148.775	-1	-1
Lowdose_2rad_IMAC_MSA1	6824	1	2	6.6908	950.3	0.44195	0.664793	0.243103	0	KGTENGVNGTLTSNVADS*PR	2236.16	159.863	-1	-1
Lowdose_2rad_IMAC_MSA1	8018	1	3	6.6838	1270.1	0.525554	0.724951	4.91803	0	KGAGDGS*DEEVDGKADGAEAKPAE	-1	-1	-1	-1
Lowdose_2rad_IMAC_MSA1	8025	1	3	6.6793	917.8	0.550716	0.742102	5.50389	0	KGAGDGS*DEEVDGKADGAEAKPAE	-1	-1	-1	-1
Lowdose_2rad_IMAC_MSA1	6424	1	3	6.6722	270.6	0.614895	0.784152	2.66261	0	NYQQNYQNS*ESGEKNEGSESAPEGQAQQR	2369.5	22.0262	-1	-1
Lowdose_2rad_IMAC_MSA1	4627	1	3	6.6669	1183.7	0.458519	0.67714	4.6516	0	KKEPAITSQNS*PEAR	2701.05	70.3732	-1	-1
Lowdose_2rad_IMAC_MSA1	8492	1	3	6.6482	758.1	0.496179	0.7044	6.99012	0	SGKNSQEDS*EDS*EDKDVK	959.348	27.2042	39.2666	-1
Lowdose_2rad_IMAC_MSA1	6217	1	2	6.645	1279.1	0.561475	0.749316	2.56431	0	STPSHGSVSSLNSTGSLS*PK	2616.65	81.1779	-1	-1
Lowdose_2rad_IMAC_MSA1	5008	1	2	6.6308	693.5	0.415832	0.64485	2.51882	0	IDASKNEEDEGHSNS*SPR	2590.14	33.2193	-1	-1
Lowdose_2rad_IMAC_MSA1	13651	1	3	6.6073	980.6	0.586473	0.765815	4.54568	0	YPLDVQKEFGYDS*PHDLDS*D	1440.62	67.806	99.0159	-1
Lowdose_2rad_IMAC_MSA1	6565	1	2	6.594	241.2	0.578435	0.760549	5.55215	0	SHT*SEGAHLDITPNSGAAGNSAGPK	2667.58	0	-1	-1
Lowdose_2rad_IMAC_MSA1	6587	1	3	6.5717	283.3	0.611653	0.782082	3.41083	0	NYQQNYQNSESGEKNEGS*ESAPEGQAQQR	2018	40.9493	-1	-1
Lowdose_2rad_IMAC_MSA1	11624	1	3	6.5537	1956.3	0.480797	0.693395	6.6185	0	REGPVGGES*DSEEMFEK	1833.54	110.209	-1	-1
Lowdose_2rad_IMAC_MSA1	8987	1	3	6.5453	620.8	0.433502	0.658409	4.38506	1e-06	SGKNS*QEDS*EDS*EDKDVK	398.425	0	0	0
Lowdose_2rad_IMAC_MSA1	7832	1	3	6.5254	456.3	0.470316	0.685796	-1.17163	1e-06	STAQQELDGKPAS*PTPVIVASHTANKEEK	1895.48	56.503	-1	-1
Lowdose_2rad_IMAC_MSA1	6817	1	2	6.5028	706.4	0.477779	0.691216	8.46187	0	KGTENGVNGTLTSNVADS*PR	2092.18	136.348	-1	-1
Lowdose_2rad_IMAC_MSA1	7468	1	2	6.4054	1425.3	0.524073	0.723929	3.82571	0	GYYSPYSVSGSGSTAGS*R	2468.31	57.8182	-1	-1
Lowdose_2rad_IMAC_MSA1	9049	1	3	6.379	1627.2	0.446057	0.667875	5.09359	0	RAS*DGGANIQLHAQQLLK	-1	-1	-1	-1
Lowdose_2rad_IMAC_MSA1	11887	1	3	6.3744	1791	0.556146	0.745752	7.04344	0	PGLRPAPNS*VDVDDFINTR	2413.41	184.896	-1	-1
Lowdose_2rad_IMAC_MSA1	5793	1	2	6.3696	923.1	0.636225	0.797637	3.08264	0	SSGS*PYGGGYGSGGGSGGYGSR	2755.88	31.0284	-1	-1
Lowdose_2rad_IMAC_MSA1	13271	1	2	6.3429	1020	0.554573	0.744697	5.85003	0	ANS*FVGTAQYVSPELLTEK	2364.61	119.204	-1	-1
Lowdose_2rad_IMAC_MSA1	10892	1	3	6.3404	485.2	0.381995	0.618057	5.65353	6e-06	KSLDS*DES*EDEEDDYQQKR	1170.14	21.5069	21.5069	-1
Lowdose_2rad_IMAC_MSA1	8895	1	3	6.3172	1391.2	0.455107	0.674616	4.62403	0	GAGDGS*DEEVDGKADGAEAKPAE	-1	-1	-1	-1
Lowdose_2rad_IMAC_MSA1	12921	1	2	6.3062	1405.5	0.479354	0.692354	3.89557	0	SPFEIIS*PPAS*PPEMVGQR	2113.25	113.187	182.276	-1
Lowdose_2rad_IMAC_MSA1	11968	1	3	6.2979	657.2	0.562632	0.750088	7.4183	0	DSSKGEDS*AEETEAKPAVVAPAPVVEAVSTPSAAFPSDATAENVK	2053.41	72.7884	-1	-1
Lowdose_2rad_IMAC_MSA1	8610	1	2	6.2698	276.7	0.520383	0.721376	3.43062	0	RTS*MGGTQQQFVEGVR	2311.5	43.2193	-1	-1
Lowdose_2rad_IMAC_MSA1	6561	1	2	6.2642	174.8	0.528926	0.727273	9.363	0	SHTS*EGAHLDITPNSGAAGNSAGPK	2561.57	0	-1	-1
Lowdose_2rad_IMAC_MSA1	13930	1	3	6.2299	609.5	0.569255	0.75449	4.2605	0	S*SKAS*LGSLEGEAEAEASSPK	1627.19	0	10.937	-1
Lowdose_2rad_IMAC_MSA1	9338	1	3	6.2157	301.3	0.342922	0.585595	-1.19557	6.7e-05	LHQLAMQQSHFPMTHGNTGFSGIESS*SPEVK	1329.08	0	-1	-1
Lowdose_2rad_IMAC_MSA1	8207	1	3	6.2149	887	0.373618	0.611243	5.21295	1e-06	KGAGDGS*DEEVDGKADGAEAKPAE	-1	-1	-1	-1
Lowdose_2rad_IMAC_MSA1	7512	1	2	6.2076	718.5	0.561473	0.749315	4.07894	0	GPPASSPAPAPKFS*PVTPK	2516.4	77.4174	-1	-1
Lowdose_2rad_IMAC_MSA1	10635	1	3	6.1896	561.9	0.564221	0.751146	4.07303	0	APRS*PPVGSGPASGVEPTSFPVESEAR	2388.12	47.1906	-1	-1
Lowdose_2rad_IMAC_MSA1	7225	1	3	6.1792	1045.8	0.442986	0.665572	4.88344	0	KGDVEGSQS*QDEGEGSGESER	2183.11	89.8739	-1	-1
Lowdose_2rad_IMAC_MSA1	6213	1	2	6.1791	1384	0.579842	0.761474	0.39527	0	STPSHGSVSSLNSTGSLS*PK	2697.44	101.178	-1	-1
Lowdose_2rad_IMAC_MSA1	6223	1	2	6.1726	957.4	0.463338	0.680689	1.76906	0	SDS*RAQAVSEDAGGNEGR	2381.42	0	-1	-1
Lowdose_2rad_IMAC_MSA1	12858	1	3	6.1723	344.2	0.52849	0.726973	5.08265	0	RSDS*PEIPFQAAAGPSDGLDASSPGNSFVGLR	2464.38	0	-1	-1
Lowdose_2rad_IMAC_MSA1	5381	1	3	6.156	580.3	0.349675	0.591333	5.17	9e-06	GQKS*PGALETPSAAGSQGNTASQGK	1699.66	111.922	-1	-1
Lowdose_2rad_IMAC_MSA1	7399	1	2	6.1513	889.7	0.419586	0.647755	6.04187	0	SRS*TTELDDYSTNK	2007.89	66.4386	-1	-1
Lowdose_2rad_IMAC_MSA1	6368	1	3	6.1478	1445.1	0.470542	0.685961	6.5527	0	KAEGEPQEES*PLKSK	2362.69	80.7239	-1	-1
Lowdose_2rad_IMAC_MSA1	8800	1	2	6.136	345.6	0.465808	0.682501	7.77995	0	GVTIPYRPKPS*SSPVIFAGGQDR	2727.19	0	-1	-1
Lowdose_2rad_IMAC_MSA1	6264	1	2	6.1351	1474.5	0.550716	0.742102	5.14174	0	SRS*DIDVNAAASAK	2225.92	31.0284	-1	-1
Lowdose_2rad_IMAC_MSA1	7885	1	3	6.1273	724	0.333295	0.577317	5.06549	9e-06	KGAGDGS*DEEVDGKADGAEAKPAE	-1	-1	-1	-1
Lowdose_2rad_IMAC_MSA1	13631	1	3	6.1011	936.9	0.470604	0.686006	3.37312	0	FDIYDPFHPTDEAYS*PPPAPEQK	52650.6	57.8182	-1	-1
Lowdose_2rad_IMAC_MSA1	12568	1	3	6.0961	432.4	0.559472	0.747979	-3.17355	0	SSHYGGS*LPNVNQIGSGLAEFQSPLHSPLDSSR	1201.86	27.9793	-1	-1
Lowdose_2rad_IMAC_MSA1	7043	1	2	6.0911	101.6	0.55962	0.748078	-0.21051	0	KPSGLNGEASKS*QEMVHLVNK	2138.61	46.6551	-1	-1
Lowdose_2rad_IMAC_MSA1	8806	1	2	6.0719	438	0.476968	0.690629	9.22243	0	GVTIPYRPKPS*SSPVIFAGGQDR	1883.24	0	-1	-1
Lowdose_2rad_IMAC_MSA1	7686	1	3	6.0659	788.2	0.433176	0.658161	5.13723	0	KGAGDGS*DEEVDGKADGAEAKPAE	-1	-1	-1	-1
Lowdose_2rad_IMAC_MSA1	13510	1	3	6.0649	502.8	0.337945	0.58133	0.496887	1.7e-05	SKS*ATLLYDQPLQVFTGSSSSSDLISGTK	3059.04	0	-1	-1
Lowdose_2rad_IMAC_MSA1	6999	1	3	6.0615	736.1	0.617652	0.785908	6.22196	0	GKGGVTGSPEASISGS*KGDLK	1920.81	55.3598	-1	-1
Lowdose_2rad_IMAC_MSA1	11772	1	2	6.0552	536.5	0.508142	0.712841	2.51495	0	AIGGIILTAS*HNPGGPNGDFGIK	1711.96	67.806	-1	-1
Lowdose_2rad_IMAC_MSA1	11608	1	3	6.0505	593.2	0.493744	0.702669	4.48359	0	AEIKEMLAS*DDEEDVSSKVEK	1925.88	94.5761	-1	-1
Lowdose_2rad_IMAC_MSA1	10298	1	2	6.036	712.6	0.533217	0.730217	3.49149	0	VQEHEDS*GDS*EVENEAK	-1	-1	-1	-1
Lowdose_2rad_IMAC_MSA1	12403	1	3	6.0337	461.7	0.597345	0.772881	4.66104	0	IYHLPDAES*DEDEDFKEQTR	2125.61	63.7642	-1	-1
Lowdose_2rad_IMAC_MSA1	11354	1	2	6.0333	597.5	0.456682	0.675783	3.84253	0	KLS*LGQYDNDAGGQLPFSK	2050.33	68.6939	-1	-1
Lowdose_2rad_IMAC_MSA1	11456	1	3	6.0244	635.6	0.516251	0.718506	4.55185	0	GPPDFS*S*DEEREPTPVLGSGAAAAGR	2093.11	154.688	163.926	-1
Lowdose_2rad_IMAC_MSA1	5384	1	2	6.021	196.3	0.399867	0.63235	-2.79837	3e-06	GQKS*PGALETPSAAGSQGNTASQGK	2343.45	158.886	-1	-1
Lowdose_2rad_IMAC_MSA1	12376	1	3	5.9929	1391.1	0.448447	0.669662	5.02932	0	LRPRS*IEVENDFLPVEK	-1	-1	-1	-1
Lowdose_2rad_IMAC_MSA1	6361	1	3	5.9906	754.5	0.44261	0.665289	6.14869	0	KAEGEPQEES*PLKSK	1469.37	55.795	-1	-1
Lowdose_2rad_IMAC_MSA1	6008	1	3	5.9778	866.7	0.444194	0.666479	6.59602	0	RRS*QS*IEQESQEK	1137.62	21.399	29.5769	-1
Lowdose_2rad_IMAC_MSA1	11867	1	2	5.9738	1230.6	0.534283	0.730947	4.10689	0	KQS*LGELIGTLNAAK	2551.13	164.238	-1	-1
Lowdose_2rad_IMAC_MSA1	8359	1	2	5.9714	760.6	0.619637	0.78717	5.12915	0	NTSAEKELSSPIS*PK	2765.06	83.1716	-1	-1
Lowdose_2rad_IMAC_MSA1	12210	1	2	5.9687	1290.5	0.594434	0.770995	3.00087	0	RAS*GQAFELILSPR	2587.09	115.442	-1	-1
Lowdose_2rad_IMAC_MSA1	6419	1	3	5.9668	406.4	0.617215	0.78563	-1.94069	0	NYQQNYQNS*ESGEKNEGSESAPEGQAQQR	2049.38	22.0262	-1	-1
Lowdose_2rad_IMAC_MSA1	11463	1	3	5.962	840	0.459728	0.678032	0.582751	0	GPPDFS*S*DEEREPTPVLGSGAAAAGR	1387.68	81.8248	90.0924	-1
Lowdose_2rad_IMAC_MSA1	11679	1	2	5.9571	256.9	0.553793	0.744173	2.70152	0	KLEKEEEEGIS*QES*S*EEEQ	-1	-1	-1	-1
Lowdose_2rad_IMAC_MSA1	9182	1	2	5.9457	1098.2	0.448761	0.669896	3.92202	0	RFS*EGVLQSPSQDQEK	1786.74	103.836	-1	-1
Lowdose_2rad_IMAC_MSA1	11804	1	2	5.9382	207.9	0.636338	0.797708	-0.282761	0	KLEKEEEEGIS*QES*S*EEEQ	-1	-1	-1	-1
Lowdose_2rad_IMAC_MSA1	12872	1	3	5.9374	498.2	0.530788	0.728552	4.68689	0	IEDS*EPHIPLIDDTDAEDDAPTKR	2020.74	198.584	-1	-1
Lowdose_2rad_IMAC_MSA1	5374	1	3	5.9103	633.5	0.448471	0.66968	5.24386	0	GQKS*PGALETPSAAGSQGNTASQGK	2949.11	191.012	-1	-1
Lowdose_2rad_IMAC_MSA1	12216	1	2	5.9099	714.1	0.51407	0.716987	4.03545	0	RAS*GQAFELILSPR	2536.02	134.796	-1	-1
Lowdose_2rad_IMAC_MSA1	8103	1	3	5.9067	488.4	0.501685	0.708297	6.7738	0	RSS*LPLDHGSPAQENPESEK	1039.18	56.5109	-1	-1
Lowdose_2rad_IMAC_MSA1	11765	1	2	5.9036	290.4	0.363304	0.602747	7.68314	4e-06	AIGGIILTAS*HNPGGPNGDFGIK	1595.04	61.565	-1	-1
Lowdose_2rad_IMAC_MSA1	14049	1	3	5.9028	556.5	0.595378	0.771607	6.03975	0	S*SKAS*LGSLEGEAEAEASSPK	1524.58	0	9.4723	-1
Lowdose_2rad_IMAC_MSA1	13676	1	3	5.9021	407.8	0.557615	0.746736	5.14792	0	S*SKAS*LGSLEGEAEAEASSPK	1053.61	0	1.7151	-1
Lowdose_2rad_IMAC_MSA1	8303	1	3	5.8985	916.4	0.541138	0.735621	5.52344	0	GHYEVTGS*DDETGKLQGSGVSLASK	2474.6	27.3069	-1	-1
Lowdose_2rad_IMAC_MSA1	4824	1	3	5.8967	1090.3	0.386759	0.6219	6.35118	1e-06	KDDDS*DDESQSSHTGK	2180.59	76.7715	-1	-1
Lowdose_2rad_IMAC_MSA1	11741	1	2	5.894	649.9	0.52036	0.72136	5.11099	0	LFSLS*NPSLSTTNLSGPSR	2587.88	56.5109	-1	-1
Lowdose_2rad_IMAC_MSA1	13571	1	3	5.8896	1086.4	0.385646	0.621004	4.16791	1e-06	TMIIS*PERLDPFADGGKT*PDPK	1136.5	9.1662	97.0576	-1
Lowdose_2rad_IMAC_MSA1	6231	1	2	5.8807	955	0.455813	0.675139	3.38984	0	SDS*RAQAVSEDAGGNEGR	2453.25	0	-1	-1
Lowdose_2rad_IMAC_MSA1	9189	1	2	5.8743	1539.3	0.424323	0.651401	3.98291	0	RFS*EGVLQSPSQDQEK	1982	154.633	-1	-1
Lowdose_2rad_IMAC_MSA1	5799	1	2	5.8708	752.8	0.66778	0.817178	3.62635	0	SSGS*PYGGGYGSGGGSGGYGSR	3040.11	0	-1	-1
Lowdose_2rad_IMAC_MSA1	8660	1	2	5.8605	660.7	0.508506	0.713096	2.43571	0	KGS*PSAQSFEELQSQR	2820.75	46.5836	-1	-1
Lowdose_2rad_IMAC_MSA1	6285	1	2	5.8496	873.3	0.557645	0.746756	4.30929	0	AGGGGGLGAGS*PALSGGQGR	1606.8	61.2862	-1	-1
Lowdose_2rad_IMAC_MSA1	12285	1	2	5.8411	513.9	0.479756	0.692644	2.87806	0	KLGDVS*PTQIDVSQFGSFK	2071.7	46.6551	-1	-1
Lowdose_2rad_IMAC_MSA1	10060	1	2	5.8401	80.3	0.482903	0.694912	0.222312	2e-06	SSPNPFVGS*PPKGLSIQNGVK	1604.63	98.444	-1	-1
Lowdose_2rad_IMAC_MSA1	12323	1	3	5.8299	361.5	0.454999	0.674536	3.35223	2e-06	RDPSSNDINGGMEPTPSTVSTPS*PSADLLGLR	2174.76	2.8635	-1	-1
Lowdose_2rad_IMAC_MSA1	13419	1	4	5.8257	348.5	0.427245	0.65364	-1.69712	0	EASSPPPHPQLHS*EEEIEPMEGPAPPVLIQLS*PPNTDADTR	1948.84	0.555	26.6493	-1
Lowdose_2rad_IMAC_MSA1	7239	1	2	5.8242	501.9	0.496875	0.704894	0.296737	0	KGDVEGSQS*QDEGEGSGESER	2597.87	77.4174	-1	-1
Lowdose_2rad_IMAC_MSA1	7887	1	2	5.8193	731.9	0.513086	0.7163	4.65514	0	GGVTGS*PEASISGSKGDLK	2057.95	81.1779	-1	-1
Lowdose_2rad_IMAC_MSA1	9772	1	3	5.8091	555.3	0.525469	0.724892	5.52344	0	SLLGDSAPTLHLNKGT*PSQS*PVVGR	2633.87	96.2096	20.7783	-1
Lowdose_2rad_IMAC_MSA1	7506	1	2	5.8002	219.9	0.406624	0.637671	-1.82757	2e-06	GKGGVTGS*PEASIS*GSKGDLK	1664.45	93.5106	24.3056	-1
Lowdose_2rad_IMAC_MSA1	6720	1	3	5.7998	735.1	0.498362	0.705948	5.22142	0	RDS*SESQLASTESDKPTTGR	2137.98	27.0275	-1	-1
Lowdose_2rad_IMAC_MSA1	13160	1	3	5.7989	740	0.413906	0.643355	3.48322	1e-06	KKYDLES*ASAILPSSAIEDPDLGSLGK	1775.82	31.309	-1	-1
Lowdose_2rad_IMAC_MSA1	11618	1	3	5.7958	1751	0.466303	0.682864	6.52631	0	REGPVGGES*DSEEMFEK	1500.29	61.565	-1	-1
Lowdose_2rad_IMAC_MSA1	12980	1	3	5.7951	463.1	0.444721	0.666874	9.04764	1e-06	S*HSLDDLQVEPGAEQDVPTEVTEPPPQIVPEVPQK	1976.94	19.888	-1	-1
Lowdose_2rad_IMAC_MSA1	11512	1	3	5.7922	630	0.438624	0.662287	3.58216	1e-06	NLNIINTHAYNQPEDLVYS*QPEMR	2361.43	46.5836	-1	-1
Lowdose_2rad_IMAC_MSA1	13173	1	3	5.7903	937.4	0.356113	0.596752	4.22096	3e-06	KKYDLES*ASAILPSSAIEDPDLGSLGK	1516.15	25.3707	-1	-1
Lowdose_2rad_IMAC_MSA1	6890	1	2	5.7868	670.4	0.513963	0.716912	1.3145	0	GKGGVTGSPEASIS*GSKGDLK	1840.65	94.8173	-1	-1
Lowdose_2rad_IMAC_MSA1	9361	1	2	5.7856	1303.6	0.587735	0.766639	1.1715	0	ASRVPS*S*DEEVVEEPQSR	2789.58	149.534	163.987	-1
Lowdose_2rad_IMAC_MSA1	5256	1	2	5.7811	635.2	0.552698	0.743437	4.21851	0	SGPKPFSAPKPQTSPS*PK	1967.61	0	-1	-1
Lowdose_2rad_IMAC_MSA1	12034	1	2	5.7728	434.1	0.442125	0.664925	5.22857	0	MSPNETLFLES*TNK	1410.09	33.2193	-1	-1
Lowdose_2rad_IMAC_MSA1	3181	1	2	5.7635	802.3	0.618704	0.786577	0.976139	0	TNS*TGGSSGSSVGGGSGK	2289.02	56.5109	-1	-1
Lowdose_2rad_IMAC_MSA1	8154	1	3	5.7448	399.7	0.405323	0.63665	4.18295	6e-06	RNS*VERPAEPVAGAATPSLVEQQK	636.056	29.0762	-1	-1
Lowdose_2rad_IMAC_MSA1	11939	1	2	5.742	472.8	0.520759	0.721636	3.07993	0	S*VSTTNIAGHFNDESPLGLR	2363.97	0	-1	-1
Lowdose_2rad_IMAC_MSA1	11590	1	2	5.7312	554.8	0.495376	0.70383	4.69382	0	LHSS*NPNLSTLDFGEEK	2348.99	0	-1	-1
Lowdose_2rad_IMAC_MSA1	8366	1	2	5.7194	907.9	0.582369	0.763131	5.05312	0	NTSAEKELSSPIS*PK	2193.78	48.5699	-1	-1
Lowdose_2rad_IMAC_MSA1	13488	1	3	5.7155	762.3	0.488951	0.69925	4.75349	0	RSASPDDDLGSS*NWEAADLGNEER	2275.45	25.4036	-1	-1
Lowdose_2rad_IMAC_MSA1	13288	1	3	5.7145	871.4	0.47166	0.686775	3.97898	0	THTDSS*EKELEPEAAEEALENGPK	2171.87	0	-1	-1
Lowdose_2rad_IMAC_MSA1	13216	1	3	5.7093	287.8	0.499851	0.707001	2.64349	1e-06	VEMGTSSQNDVDMSWIPQETLNQINKAS*PR	1482.21	6.1989	-1	-1
Lowdose_2rad_IMAC_MSA1	10629	1	3	5.7092	475.3	0.456842	0.675901	3.15919	1e-06	APRS*PPVGSGPASGVEPTSFPVESEAR	2439.58	56.7945	-1	-1
Lowdose_2rad_IMAC_MSA1	11586	1	3	5.7082	975.2	0.509495	0.713789	5.03679	0	QRPVPQPSSAS*LDEYTLMR	1854.5	86.3799	-1	-1
Lowdose_2rad_IMAC_MSA1	7395	1	2	5.7081	591.8	0.460381	0.678514	5.69385	0	SRS*TTELDDYSTNK	1526	46.5836	-1	-1
Lowdose_2rad_IMAC_MSA1	5316	1	3	5.6959	464.3	0.469864	0.685466	2.52869	1e-06	SAGGGAGPGGAAGGGVGGGDEPGS*PAQGKR	2128.33	311.013	-1	-1
Lowdose_2rad_IMAC_MSA1	4633	1	3	5.6948	1325.9	0.429919	0.655682	6.50211	0	KKEPAITSQNS*PEAR	2274.74	97.3155	-1	-1
Lowdose_2rad_IMAC_MSA1	12424	1	3	5.6814	501.4	0.465501	0.682276	6.47197	1e-06	SFGTRPLS*SGFSPEEAQQQDEEFEK	2519.18	51.5843	-1	-1
Lowdose_2rad_IMAC_MSA1	5951	1	2	5.6742	712.6	0.507226	0.712198	5.13286	0	GKGGVTGS*PEASISGSK	2467.02	128.462	-1	-1
Lowdose_2rad_IMAC_MSA1	8483	1	3	5.6723	736.6	0.479047	0.692132	6.28664	0	RDS*LGAYASQDANEQGQDLGKR	1380.76	65.9605	-1	-1
Lowdose_2rad_IMAC_MSA1	9562	1	3	5.6667	341.5	0.437309	0.661293	4.58071	4e-06	MAPTPIPTRS*PSDSSTASTPVAEQIER	1846.9	15.525	-1	-1
Lowdose_2rad_IMAC_MSA1	7694	1	3	5.6623	1084.3	0.370097	0.608356	4.99375	1e-06	KGAGDGS*DEEVDGKADGAEAKPAE	-1	-1	-1	-1
Lowdose_2rad_IMAC_MSA1	11671	1	2	5.6519	231.4	0.621897	0.788604	3.54216	0	KLEKEEEEGIS*QES*S*EEEQ	-1	-1	-1	-1
Lowdose_2rad_IMAC_MSA1	14294	1	3	5.647	548.2	0.594528	0.771056	6.27816	0	SSKAS*LGS*LEGEAEAEASSPK	2075.56	13.5686	15.5524	-1
Lowdose_2rad_IMAC_MSA1	11500	1	2	5.62	239	0.403915	0.635543	3.84638	3e-06	NMPGLSAATLASLGGTSS*R	1354.84	0	-1	-1
Lowdose_2rad_IMAC_MSA1	6299	1	2	5.6154	516.2	0.473359	0.688011	4.99257	0	SDKS*PDLAPTPAPQSTPR	2220.36	25.6136	-1	-1
Lowdose_2rad_IMAC_MSA1	12670	1	3	5.6091	374.4	0.470378	0.685841	-1.09285	1e-06	MLPHAPGVQMQAIPEDAIPEES*GDEDEDDPDKR	-1	-1	-1	-1
Lowdose_2rad_IMAC_MSA1	5130	1	2	5.5947	645.4	0.568109	0.75373	3.90277	0	SGPKPFSAPKPQT*SPSPK	2043.15	0	-1	-1
Lowdose_2rad_IMAC_MSA1	9233	1	3	5.5947	1070.5	0.489553	0.699681	5.05058	0	TTRT*PEEGGYSYDISEK	2146.03	31.309	-1	-1
Lowdose_2rad_IMAC_MSA1	6610	1	3	5.5778	182.6	0.522339	0.72273	8.65421	3e-06	NYQQNYQNSESGEKNEGS*ESAPEGQAQQR	1236.72	31.309	-1	-1
Lowdose_2rad_IMAC_MSA1	7559	1	3	5.569	534.2	0.386138	0.6214	7.35969	4e-06	SGKNSQEDS*EDSEDKDVK	1774.3	35.372	-1	-1
Lowdose_2rad_IMAC_MSA1	12305	1	3	5.5617	1090.7	0.561303	0.749202	5.41131	0	KLGDVSPT*QIDVSQFGSFK	2655.63	0	-1	-1
Lowdose_2rad_IMAC_MSA1	6557	1	3	5.5609	924.7	0.458109	0.676837	4.79959	0	SHT*SEGAHLDITPNSGAAGNSAGPK	2961.22	18.1803	-1	-1
Lowdose_2rad_IMAC_MSA1	10630	1	3	5.5478	511.2	0.533202	0.730207	5.54861	0	KPLPDHVSIVEPKDEILPTT*PISEQK	1590.45	23.9593	-1	-1
Lowdose_2rad_IMAC_MSA1	8639	1	3	5.5476	565.8	0.598962	0.773926	4.4173	0	LGHPEALSAGTGS*PQPPSFTYAQQR	3000.34	33.7963	-1	-1
Lowdose_2rad_IMAC_MSA1	11523	1	2	5.5473	232.2	0.606998	0.779101	4.24311	0	RAS*DTSLTQGIVAFR	1703.37	85.6197	-1	-1
Lowdose_2rad_IMAC_MSA1	14287	1	3	5.5449	459.8	0.522823	0.723065	5.06845	0	S*SKAS*LGSLEGEAEAEASSPK	1590.56	0	0	-1
Lowdose_2rad_IMAC_MSA1	6080	1	3	5.5391	526.4	0.350526	0.592052	4.06956	1.2e-05	RSS*QPSPTAVPASDSPPTKQEVK	1772.99	36.73	-1	-1
Lowdose_2rad_IMAC_MSA1	11507	1	2	5.5303	509.9	0.540531	0.735208	4.68463	0	NMPGLSAATLASLGGTSS*R	2775.06	0	-1	-1
Lowdose_2rad_IMAC_MSA1	6473	1	3	5.5243	334.9	0.544558	0.737942	-0.624925	0	HPGAHQGNLASGLHSNAIASPGS*PSLGR	991.981	0	-1	-1
Lowdose_2rad_IMAC_MSA1	13215	1	3	5.5236	512.5	0.424759	0.651735	4.91843	2e-06	ELSNS*PLRENSFGS*PLEFR	1973.2	52.255	41.9682	-1
Lowdose_2rad_IMAC_MSA1	12280	1	2	5.5158	499.4	0.483393	0.695265	3.5539	0	KLGDVS*PTQIDVSQFGSFK	955.286	87.4145	-1	-1
Lowdose_2rad_IMAC_MSA1	3409	1	2	5.5064	736.1	0.425251	0.652113	3.52752	0	SRLS*SSSSNDSGNK	1224.25	46.5836	-1	-1
Lowdose_2rad_IMAC_MSA1	9564	1	2	5.5057	1048.2	0.524747	0.724394	3.75414	0	IHIDPEIQDGS*PTTSR	2122.24	57.8182	-1	-1
Lowdose_2rad_IMAC_MSA1	11581	1	3	5.5036	854.9	0.631568	0.794713	4.96791	0	SLDS*DES*EDEEDDYQQKR	2207.79	33.936	79.3183	-1
Lowdose_2rad_IMAC_MSA1	11604	1	3	5.5025	556.2	0.435093	0.659616	4.91357	1e-06	AEIKEMLAS*DDEEDVSSKVEK	2083.64	125.988	-1	-1
Lowdose_2rad_IMAC_MSA1	8979	1	3	5.4997	384.5	0.395749	0.629086	5.16416	9e-06	SGKNS*QEDS*EDS*EDKDVK	120.704	0	37.5872	41.6744
Lowdose_2rad_IMAC_MSA1	11283	1	3	5.4941	476.6	0.481644	0.694006	4.62202	1e-06	KLGDVS*PTQIDVSQFGSFKEDTK	932.296	46.6551	-1	-1
Lowdose_2rad_IMAC_MSA1	13818	1	3	5.4935	687.5	0.633148	0.795706	4.82562	0	SSKAS*LGS*LEGEAEAEASSPK	1324.51	19.355	19.355	-1
Lowdose_2rad_IMAC_MSA1	9629	1	3	5.4863	128.9	0.416273	0.645192	4.51301	9.4e-05	MGQAPSQSLLPPAQDQPRS*PVPSAFSDQSR	2136.06	16.9626	-1	-1
Lowdose_2rad_IMAC_MSA1	10295	1	3	5.4852	467.2	0.516864	0.718933	5.71795	0	VQEHEDS*GDS*EVENEAK	-1	-1	-1	-1
Lowdose_2rad_IMAC_MSA1	14648	1	3	5.483	513.4	0.528324	0.726859	5.39074	0	S*SKAS*LGSLEGEAEAEASSPK	2304.54	0	0	-1
Lowdose_2rad_IMAC_MSA1	13438	1	3	5.4681	670.7	0.523473	0.723514	5.00739	0	KETES*EAEDNLDDLEK	1896.65	0	-1	-1
Lowdose_2rad_IMAC_MSA1	11735	1	2	5.4675	852.6	0.429758	0.655559	3.58107	0	LFSLS*NPSLSTTNLSGPSR	1759.65	23.9593	-1	-1
Lowdose_2rad_IMAC_MSA1	6327	1	3	5.4668	585	0.448196	0.669474	5.07595	1e-06	KVEEEGS*PGDPDHEASTQGR	1636.13	177.904	-1	-1
Lowdose_2rad_IMAC_MSA1	6174	1	2	5.4646	1112.4	0.411503	0.641485	5.35842	0	SRS*DIDVNAAAGAK	2105.99	23.9593	-1	-1
Lowdose_2rad_IMAC_MSA1	7233	1	2	5.4566	515.7	0.457776	0.676591	5.78213	0	KGDVEGSQS*QDEGEGSGESER	2501.86	97.2212	-1	-1
Lowdose_2rad_IMAC_MSA1	5004	1	2	5.4531	592.8	0.360694	0.600578	-2.16768	2e-06	IDASKNEEDEGHSNS*SPR	2291.11	36.4386	-1	-1
Lowdose_2rad_IMAC_MSA1	5410	1	2	5.4478	196.9	0.54009	0.734908	3.93651	0	DSPSKSS*AEAQTPEDTPNK	2013.84	40.5889	-1	-1
Lowdose_2rad_IMAC_MSA1	8616	1	2	5.4469	412.5	0.501441	0.708125	3.88062	0	RTS*MGGTQQQFVEGVR	2082.11	66.4386	-1	-1
Lowdose_2rad_IMAC_MSA1	5709	1	3	5.4377	706.2	0.460213	0.67839	5.85708	0	KLGAGEGGEASVS*PEKTSTTSK	1157.72	0	-1	-1
Lowdose_2rad_IMAC_MSA1	6627	1	3	5.4369	1549.1	0.456804	0.675873	7.23695	0	RGS*IGENQIKDEK	-1	-1	-1	-1
Lowdose_2rad_IMAC_MSA1	11367	1	2	5.4367	632.2	0.526753	0.725778	4.05027	0	YESQEPLAGQES*PLPLATR	2615.16	103.892	-1	-1
Lowdose_2rad_IMAC_MSA1	6620	1	3	5.4366	871.2	0.357503	0.597916	7.11892	3e-06	RGS*IGENQIKDEK	-1	-1	-1	-1
Lowdose_2rad_IMAC_MSA1	8212	1	3	5.4355	763.1	0.344587	0.587015	5.21295	6e-06	KGAGDGS*DEEVDGKADGAEAKPAE	-1	-1	-1	-1
Lowdose_2rad_IMAC_MSA1	7038	1	2	5.4335	95.6	0.386399	0.62161	8.01203	1.6e-05	KPSGLNGEASKS*QEMVHLVNK	1814.34	46.6551	-1	-1
Lowdose_2rad_IMAC_MSA1	6670	1	2	5.4333	2134.3	0.510224	0.7143	5.55098	0	KGAGDGS*DEEVDGK	-1	-1	-1	-1
Lowdose_2rad_IMAC_MSA1	5720	1	3	5.4286	369.8	0.491305	0.700932	7.82334	1e-06	VRGGAPDPSPGATATPGAPAQPSS*PDAR	2410.62	28.879	-1	-1
Lowdose_2rad_IMAC_MSA1	12931	1	3	5.4144	600.2	0.430112	0.655829	5.59907	1e-06	NDARS*PGSISYLPSFFTK	1313.45	26.5908	-1	-1
Lowdose_2rad_IMAC_MSA1	10090	1	2	5.4136	66.2	0.379858	0.616326	1.32933	4.4e-05	SSPNPFVGS*PPKGLSIQNGVK	1178.01	106.162	-1	-1
Lowdose_2rad_IMAC_MSA1	10698	1	3	5.4101	830.4	0.461674	0.679466	7.67033	0	VRGEVAPDAKS*FVLNLGK	-1	-1	-1	-1
Lowdose_2rad_IMAC_MSA1	5958	1	2	5.4034	1050.8	0.63647	0.797791	4.67797	0	GKGGVTGS*PEASISGSK	2696.24	132.095	-1	-1
Lowdose_2rad_IMAC_MSA1	9352	1	3	5.4006	234.1	0.367441	0.606169	0.790388	6.7e-05	LHQLAMQQSHFPMTHGNTGFSGIESS*SPEVK	2061.15	40.807	-1	-1
Lowdose_2rad_IMAC_MSA1	12882	1	3	5.3997	1319.9	0.442932	0.665531	6.75325	0	GQGESDPLDHEPAVS*PLLPR	2018.56	174.664	-1	-1
Lowdose_2rad_IMAC_MSA1	10583	1	3	5.3945	510.7	0.428362	0.654494	-1.75164	2e-06	TSSDS*ALHTSVMNPSPQDTYPGPTPPSILPSR	2369.53	11.8305	-1	-1
Lowdose_2rad_IMAC_MSA1	12886	1	3	5.3919	943.9	0.517424	0.719322	6.10398	0	GQGESDPLDHEPAVS*PLLPR	1716.99	132.44	-1	-1
Lowdose_2rad_IMAC_MSA1	13351	1	3	5.3916	644.7	0.463332	0.680685	5.35467	0	KTSS*DDES*EEDEDDLLQR	1675.79	24.3056	33.8331	-1
Lowdose_2rad_IMAC_MSA1	4549	1	2	5.3833	241.5	0.516059	0.718372	2.30274	0	TNTMNGSKS*PVISRPK	1117.27	67.806	-1	-1
Lowdose_2rad_IMAC_MSA1	11629	1	2	5.3821	2118.2	0.452314	0.672543	4.25947	0	LGEAS*DSELADADK	2111.77	75.9104	-1	-1
Lowdose_2rad_IMAC_MSA1	10210	1	3	5.3802	404.4	0.500093	0.707173	4.3151	1e-06	MGQAGSTIS*NSHAQPFDFPDDNQNSK	2183.89	10.937	-1	-1
Lowdose_2rad_IMAC_MSA1	7893	1	2	5.3771	523.1	0.513158	0.71635	5.11531	0	GGVTGS*PEASISGSKGDLK	1550.07	86.4386	-1	-1
Lowdose_2rad_IMAC_MSA1	6875	1	3	5.3743	526.8	0.476806	0.690511	6.57736	0	GKGGVTGS*PEASISGSKGDLK	2010.63	95.8731	-1	-1
Lowdose_2rad_IMAC_MSA1	2955	1	2	5.3646	246.2	0.553406	0.743913	5.39484	0	GRASS*HSSQTQGGGSVTK	1871.41	33.2193	-1	-1
Lowdose_2rad_IMAC_MSA1	13937	1	3	5.3627	567.6	0.561695	0.749463	2.40177	0	S*SKAS*LGSLEGEAEAEASSPK	1918.18	0	0	-1
Lowdose_2rad_IMAC_MSA1	3992	1	2	5.3537	506.9	0.415451	0.644555	4.32565	1e-06	KRS*PSPS*PTPEAK	2084.9	15.0589	28.7069	-1
Lowdose_2rad_IMAC_MSA1	11797	1	2	5.3531	174.2	0.649717	0.80605	1.30299	0	KLEKEEEEGIS*QES*S*EEEQ	-1	-1	-1	-1
Lowdose_2rad_IMAC_MSA1	7882	1	3	5.3462	1287.9	0.431765	0.657088	3.09668	0	KGAGDGS*DEEVDGKADGAEAKPAE	-1	-1	-1	-1
Lowdose_2rad_IMAC_MSA1	11525	1	3	5.3332	378.2	0.542789	0.736742	3.75614	0	KLEKEEEEGIS*QES*S*EEEQ	-1	-1	-1	-1
Lowdose_2rad_IMAC_MSA1	11347	1	2	5.3321	697.4	0.482399	0.694549	2.71292	0	KLS*LGQYDNDAGGQLPFSK	2120.78	48.5699	-1	-1
Lowdose_2rad_IMAC_MSA1	11932	1	2	5.3278	359	0.449022	0.670091	2.31554	0	SVS*TTNIAGHFNDESPLGLR	2301.47	0	-1	-1
Lowdose_2rad_IMAC_MSA1	11257	1	2	5.3232	390.3	0.452622	0.672772	1.26368	0	KLS*GDQITLPTTVDYSSVPK	1693.83	87.661	-1	-1
Lowdose_2rad_IMAC_MSA1	8697	1	3	5.3223	884.1	0.359844	0.59987	0.944981	3e-06	SKETSSPGTDDVFTPAPSDS*PSSQR	2948.94	15.525	-1	-1
Lowdose_2rad_IMAC_MSA1	11910	1	3	5.322	375.8	0.455637	0.675009	2.48155	2e-06	RRS*QFFEQGSSDSVVPDLPVPTISAPSR	2247.86	43.1465	-1	-1
Lowdose_2rad_IMAC_MSA1	8640	1	2	5.3216	186.3	0.552071	0.743015	6.98732	0	ERS*PS*PLRGNVVPS*PLPTR	1823.23	124.603	124.603	0
Lowdose_2rad_IMAC_MSA1	7495	1	3	5.3181	87.6	0.403622	0.635313	1.6251	0.000331	RGEGDAPFSEPGTTSTQRPS*SPETATK	1164.55	0	-1	-1
Lowdose_2rad_IMAC_MSA1	4020	1	2	5.3172	529.4	0.598398	0.773562	4.16587	0	SQSSDTEQQS*PTSGGGK	2332.59	85.6197	-1	-1
Lowdose_2rad_IMAC_MSA1	4818	1	3	5.3145	693.9	0.491956	0.701396	6.16453	0	KDDDS*DDESQSSHTGK	1978.18	76.7715	-1	-1
Lowdose_2rad_IMAC_MSA1	14405	1	3	5.3065	522	0.495279	0.703761	2.80354	0	S*SKASLGS*LEGEAEAEASSPK	1614.76	15.7098	38.7971	-1
Lowdose_2rad_IMAC_MSA1	12299	1	3	5.3063	711.9	0.483011	0.69499	5.0617	0	TEVALAKDMESPT*KLDVTLAK	996.392	19.888	-1	-1
Lowdose_2rad_IMAC_MSA1	8889	1	3	5.3055	1097.6	0.400999	0.633245	3.08689	0	GAGDGS*DEEVDGKADGAEAKPAE	-1	-1	-1	-1
Lowdose_2rad_IMAC_MSA1	10843	1	3	5.2985	616.1	0.505162	0.710747	3.60582	0	LLKEGEEPTVY*SDEEEPKDESAR	1536.39	27.0275	-1	-1
Lowdose_2rad_IMAC_MSA1	7521	1	2	5.2955	477.7	0.549655	0.741387	4.46296	0	GPPASSPAPAPKFS*PVTPK	2328.9	65.9172	-1	-1
Lowdose_2rad_IMAC_MSA1	10436	1	3	5.2934	695.6	0.409642	0.640033	7.45354	1e-06	GPPDFSSDEEREPT*PVLGSGAAAAGR	2770.65	106.474	-1	-1
Lowdose_2rad_IMAC_MSA1	11896	1	2	5.2879	604.1	0.491953	0.701394	-1.51864	0	PGLRPAPNS*VDVDDFINTR	2066.56	156.243	-1	-1
Lowdose_2rad_IMAC_MSA1	11262	1	2	5.2799	518.6	0.413493	0.643034	1.5851	1e-06	KLS*GDQITLPTTVDYSSVPK	1983.47	113.841	-1	-1
Lowdose_2rad_IMAC_MSA1	11600	1	2	5.2783	237.8	0.517004	0.71903	2.26686	0	AKS*PTPESSTIASYVTLR	2184.55	112.877	-1	-1
Lowdose_2rad_IMAC_MSA1	14412	1	3	5.2773	501.3	0.532621	0.729809	5.06845	0	S*SKAS*LGSLEGEAEAEASSPK	1590.99	0	0	-1
Lowdose_2rad_IMAC_MSA1	11195	1	2	5.2733	170.3	0.545048	0.738274	-1.49787	0	KLEKEEEEGIS*QES*S*EEEQ	-1	-1	-1	-1
Lowdose_2rad_IMAC_MSA1	11605	1	2	5.2733	561.6	0.484403	0.695991	3.83928	0	AKS*PTPESSTIASYVTLR	2063.61	56.5109	-1	-1
Lowdose_2rad_IMAC_MSA1	6870	1	3	5.2728	1049.1	0.500759	0.707643	4.97562	0	GKGGVTGS*PEASISGSKGDLK	1617.58	31.2397	-1	-1
Lowdose_2rad_IMAC_MSA1	4510	1	3	5.2696	545.4	0.41468	0.643957	7.54017	2e-06	KETQS*PEQVKSEK	1755.97	33.7963	-1	-1
Lowdose_2rad_IMAC_MSA1	5265	1	2	5.2679	868.3	0.528294	0.726838	4.15639	0	SGPKPFSAPKPQT*SPSPK	2468.88	66.4386	-1	-1
Lowdose_2rad_IMAC_MSA1	13265	1	2	5.2671	1039.7	0.455108	0.674617	5.0688	0	ANS*FVGTAQYVSPELLTEK	1956.76	77.8778	-1	-1
Lowdose_2rad_IMAC_MSA1	4678	1	2	5.2565	910.6	0.421554	0.649272	2.09635	0	TSQVGAASAPAKES*PR	1721.11	68.71	-1	-1
Lowdose_2rad_IMAC_MSA1	11582	1	3	5.2494	1129.3	0.441098	0.664152	3.90159	0	GPPDFS*S*DEEREPTPVLGSGAAAAGR	2073.92	124.395	136.489	-1
Lowdose_2rad_IMAC_MSA1	7739	1	2	5.2402	712.1	0.46649	0.683001	4.06217	0	AQFSVAGVHTVPGS*PQAR	1888	45.324	-1	-1
Lowdose_2rad_IMAC_MSA1	13756	1	3	5.2398	729	0.275602	0.524978	5.49991	6.7e-05	NAIS*LPQLNQAAYDSLVVGK	2344.39	107.868	-1	-1
Lowdose_2rad_IMAC_MSA1	11918	1	3	5.2377	660.3	0.298471	0.546325	5.98107	3.5e-05	SVS*TTNIAGHFNDESPLGLR	1722.12	28.879	-1	-1
Lowdose_2rad_IMAC_MSA1	8888	1	3	5.2342	365	0.284208	0.533112	1.35703	0.000243	RPGQSFHVNSEVNSVLS*PR	944.788	33.936	-1	-1
Lowdose_2rad_IMAC_MSA1	14154	1	2	5.2309	552.9	0.492783	0.701985	4.8096	0	SSS*PAPADIAQTVQEDLR	3011.49	0	-1	-1
Lowdose_2rad_IMAC_MSA1	6558	1	3	5.2304	1366.5	0.442758	0.665401	7.4825	0	RDS*LTGSSDLYKR	2213.23	61.74	-1	-1
Lowdose_2rad_IMAC_MSA1	6895	1	2	5.2302	608.1	0.453635	0.673524	3.09637	0	GKGGVTGS*PEASISGSKGDLK	1979.02	73.2379	-1	-1
Lowdose_2rad_IMAC_MSA1	13431	1	2	5.2256	1282.3	0.395361	0.628777	3.64569	0	KETES*EAEDNLDDLEK	2169.26	66.4386	-1	-1
Lowdose_2rad_IMAC_MSA1	9038	1	3	5.2208	1433.3	0.459566	0.677913	4.82239	0	RAS*DGGANIQLHAQQLLK	-1	-1	-1	-1
Lowdose_2rad_IMAC_MSA1	7761	1	2	5.215	1139.5	0.485714	0.696932	1.09175	0	GKS*ESQMDITDINTPKPK	2352.08	46.5836	-1	-1
Lowdose_2rad_IMAC_MSA1	13221	1	3	5.2121	320.8	0.485332	0.696658	-0.368727	1e-06	VEMGTSSQNDVDMSWIPQETLNQINKAS*PR	1121.68	17.8251	-1	-1
Lowdose_2rad_IMAC_MSA1	10431	1	3	5.2108	832.2	0.529803	0.727876	5.24454	0	GPPDFSSDEEREPT*PVLGSGAAAAGR	1873.07	71.0801	-1	-1
Lowdose_2rad_IMAC_MSA1	5826	1	3	5.2103	625.3	0.471911	0.686958	7.30721	0	SKGHYEVTGS*DDETGK	1289.52	19.2919	-1	-1
Lowdose_2rad_IMAC_MSA1	14175	1	3	5.2093	635.2	0.503119	0.709309	6.11922	0	SSKAS*LGS*LEGEAEAEASSPK	689.408	0	18.2035	-1
Lowdose_2rad_IMAC_MSA1	9481	1	2	5.2079	828.4	0.485781	0.69698	4.30132	0	KDS*LTQAQEQGNLLN	1718.59	57.8182	-1	-1
Lowdose_2rad_IMAC_MSA1	9906	1	2	5.2011	322.7	0.431466	0.656861	0.049818	1e-06	RDTQS*NELIEINPQSEGK	1648.33	33.5845	-1	-1
Lowdose_2rad_IMAC_MSA1	14266	1	3	5.1984	874.9	0.524835	0.724455	6.62557	0	S*SSPAPADIAQTVQEDLR	3140.14	0	-1	-1
Lowdose_2rad_IMAC_MSA1	7769	1	2	5.1978	963.7	0.380257	0.61665	3.27526	1e-06	GKSES*QMDITDINTPKPK	2566.43	25.4036	-1	-1
Lowdose_2rad_IMAC_MSA1	10464	1	4	5.1976	198.5	0.311817	0.558406	1.25253	4.4e-05	NSPVT*KTPPRDLPTIPGVTSPSSDEPPMEASQSHLR	1251.5	10.6013	-1	-1
Lowdose_2rad_IMAC_MSA1	10284	1	3	5.1966	449.7	0.46413	0.681271	4.0343	1e-06	VQEHEDS*GDS*EVENEAK	-1	-1	-1	-1
Lowdose_2rad_IMAC_MSA1	8099	1	3	5.1961	652.8	0.33146	0.575726	7.40093	1.7e-05	RSS*LPLDHGSPAQENPESEK	1646.05	46.5836	-1	-1
Lowdose_2rad_IMAC_MSA1	9225	1	3	5.1817	423.9	0.454947	0.674498	6.1892	1e-06	SPEKIEEVLSPEGSPSKSPS*K	2339.65	54.8418	-1	-1
Lowdose_2rad_IMAC_MSA1	6624	1	2	5.1754	504.9	0.483306	0.695202	5.18121	0	QVAEQGGDLS*PAANR	-1	-1	-1	-1
Lowdose_2rad_IMAC_MSA1	14522	1	3	5.1749	542.6	0.529885	0.727932	7.09053	0	S*SKAS*LGSLEGEAEAEASSPK	1698	36.73	0	-1
Lowdose_2rad_IMAC_MSA1	7291	1	2	5.1746	618.3	0.476172	0.690052	4.40165	0	KLTS*DEEGEPSGK	1899.32	33.2193	-1	-1
Lowdose_2rad_IMAC_MSA1	13565	1	3	5.1738	636.8	0.442905	0.665511	4.23673	1e-06	TMIIS*PERLDPFADGGKT*PDPK	822.461	0	102.471	-1
Lowdose_2rad_IMAC_MSA1	3201	1	2	5.1717	332.7	0.501267	0.708002	3.60538	0	NTPSQHSHSIQHS*PER	1163.49	129.24	-1	-1
Lowdose_2rad_IMAC_MSA1	11860	1	2	5.1671	1014.6	0.49043	0.700307	5.5122	0	KQS*LGELIGTLNAAK	2234.82	126.211	-1	-1
Lowdose_2rad_IMAC_MSA1	10223	1	3	5.1671	419.3	0.470651	0.68604	-0.873945	1e-06	MGQAGSTIS*NSHAQPFDFPDDNQNSK	1812.11	25.8184	-1	-1
Lowdose_2rad_IMAC_MSA1	8993	1	3	5.1661	534.5	0.317899	0.563825	4.95639	3.5e-05	LPNTYPNS*SSPGPGGLGGSVHYATMAR	1909.67	23.537	-1	-1
Lowdose_2rad_IMAC_MSA1	7797	1	3	5.164	468.2	0.380267	0.616658	6.84738	9e-06	SRPFTVAASFQSTSVKS*PK	1856.71	66.8964	-1	-1
Lowdose_2rad_IMAC_MSA1	9950	1	2	5.1611	517.6	0.457732	0.676559	3.41446	0	AAS*LNYLNQPSAAPLQVSR	1825.58	40.3036	-1	-1
Lowdose_2rad_IMAC_MSA1	6628	1	2	5.1579	643.9	0.420539	0.64849	5.40143	0	QVAEQGGDLS*PAANR	-1	-1	-1	-1
Lowdose_2rad_IMAC_MSA1	5135	1	2	5.1568	918.1	0.566999	0.752993	5.67299	0	SGPKPFSAPKPQTS*PSPK	1952.05	81.1779	-1	-1
Lowdose_2rad_IMAC_MSA1	8688	1	3	5.1535	820	0.322441	0.567839	1.68485	1.2e-05	SKETSSPGTDDVFTPAPSDS*PSSQR	1829.03	0	-1	-1
Lowdose_2rad_IMAC_MSA1	11597	1	2	5.1511	684.6	0.467318	0.683607	2.94475	0	LHSS*NPNLSTLDFGEEK	2119.8	43.2193	-1	-1
Lowdose_2rad_IMAC_MSA1	3401	1	2	5.1487	585.3	0.467633	0.683837	3.92527	0	SRLS*SSSSNDSGNK	1745.36	56.5109	-1	-1
Lowdose_2rad_IMAC_MSA1	12372	1	3	5.1485	1514.2	0.416238	0.645165	5.69563	0	LRPRS*IEVENDFLPVEK	-1	-1	-1	-1
Lowdose_2rad_IMAC_MSA1	9816	1	2	5.1477	1296.2	0.466266	0.682837	5.66428	0	KTGS*YGALAEITASK	2481.77	0	-1	-1
Lowdose_2rad_IMAC_MSA1	9424	1	3	5.1456	285.3	0.445176	0.667215	2.83191	6e-06	SEDES*ET*EDEEEKSQEDQEQKR	946.151	32.7278	70.5378	-1
Lowdose_2rad_IMAC_MSA1	12865	1	3	5.1395	425.4	0.49211	0.701506	4.62508	1e-06	IEDS*EPHIPLIDDTDAEDDAPTKR	1888.03	222.357	-1	-1
Lowdose_2rad_IMAC_MSA1	7742	1	3	5.1363	479.5	0.498219	0.705846	6.03758	0	GKS*ESQMDITDINTPKPK	1985.05	48.6032	-1	-1
Lowdose_2rad_IMAC_MSA1	8694	1	2	5.1361	604.2	0.457429	0.676335	1.3775	0	TDSREDEIS*PPPPNPVVK	2023.9	108.067	-1	-1
Lowdose_2rad_IMAC_MSA1	6092	1	3	5.1352	833.9	0.410422	0.640642	4.50673	1e-06	RSS*QPSPTAVPASDSPPTKQEVK	1703.58	40.807	-1	-1
Lowdose_2rad_IMAC_MSA1	3196	1	2	5.1347	487	0.465266	0.682104	0.415414	0	NTPSQHSHSIQHS*PER	1175.85	100.138	-1	-1
Lowdose_2rad_IMAC_MSA1	4300	1	3	5.1285	460.9	0.408482	0.639126	6.23897	4e-06	KVS*KQEEASGGPTAPK	974.516	150.355	-1	-1
Lowdose_2rad_IMAC_MSA1	5716	1	3	5.1214	507.1	0.541297	0.735729	6.91154	0	KLGAGEGGEASVS*PEKTSTTSK	1315.24	30.4229	-1	-1
Lowdose_2rad_IMAC_MSA1	5746	1	2	5.119	609.9	0.465189	0.682048	3.91809	0	NSSNTSVGS*PSNTIGR	1670.94	36.8721	-1	-1
Lowdose_2rad_IMAC_MSA1	13811	1	3	5.1165	499	0.414639	0.643925	4.01767	3e-06	S*S*KASLGSLEGEAEAEASSPK	1544.34	0	0	-1
Lowdose_2rad_IMAC_MSA1	13266	1	3	5.1117	1891.5	0.528572	0.72703	5.49158	0	ANS*FVGTAQYVSPELLTEK	2107.3	43.9645	-1	-1
Lowdose_2rad_IMAC_MSA1	8313	1	2	5.1102	294.2	0.455227	0.674705	9.46769	1e-06	GHYEVTGS*DDETGKLQGSGVSLASK	1781.21	65.9605	-1	-1
Lowdose_2rad_IMAC_MSA1	7962	1	2	5.1085	756.5	0.41523	0.644383	5.49781	0	NRS*AEEGELAESK	1819.87	211.213	-1	-1
Lowdose_2rad_IMAC_MSA1	8085	3	2	5.1058	331.5	0.473207	0.6879	2.79309	0	GGVTGSPEAS*ISGSKGDLK	868.611	0	-1	-1
Lowdose_2rad_IMAC_MSA1	9968	1	3	5.1053	240.6	0.44918	0.670209	4.26047	9e-06	ADAPDAGAQS*DSELPSYHQNDVSLDR	1994.88	59.7937	-1	-1
Lowdose_2rad_IMAC_MSA1	11911	1	2	5.104	655.5	0.403213	0.634991	0.351496	1e-06	PGLRPAPNS*VDVDDFINTR	2444.61	155.857	-1	-1
Lowdose_2rad_IMAC_MSA1	13480	1	3	5.0999	676.1	0.352654	0.593847	5.27807	9e-06	RSASPDDDLGSS*NWEAADLGNEER	2064.25	0	-1	-1
Lowdose_2rad_IMAC_MSA1	12314	1	3	5.0963	469.5	0.353609	0.59465	-0.459834	1.7e-05	NSFSFS*DEKLNSPTDSTPALLSATVTPQK	1744.06	31.4605	-1	-1
Lowdose_2rad_IMAC_MSA1	14725	1	3	5.0912	689.2	0.390144	0.624615	1.38866	3e-06	GGAGTGGTGS*PQASLEILAPEDSQVLQQATR	1425.6	1.2445	-1	-1
Lowdose_2rad_IMAC_MSA1	11854	1	3	5.0903	524.8	0.429955	0.65571	5.21442	2e-06	PLS*PVPHVNNVVNAPLSINIPR	1815.07	180.768	-1	-1
Lowdose_2rad_IMAC_MSA1	3380	1	3	5.0902	1108.2	0.29767	0.545591	3.19022	1.2e-05	HSTPSNSSNPSGPPS*PNSPHR	2580.81	32.8497	-1	-1
Lowdose_2rad_IMAC_MSA1	12648	1	3	5.085	327.6	0.439253	0.662762	4.11627	6e-06	EATSDPS*RTPEEEPLNLEGLVAHR	1643.49	0	-1	-1
Lowdose_2rad_IMAC_MSA1	10290	1	2	5.0835	516.7	0.442274	0.665037	3.60649	0	VQEHEDS*GDS*EVENEAK	-1	-1	-1	-1
Lowdose_2rad_IMAC_MSA1	13047	1	2	5.0818	179.5	0.448975	0.670056	3.24457	2e-06	RGS*GDTSSLIDPDTSLSELR	1486.09	50.7334	-1	-1
Lowdose_2rad_IMAC_MSA1	3998	1	2	5.0813	451.3	0.432429	0.657593	3.93704	1e-06	KRS*PS*PSPTPEAK	1985.15	89.4356	46.6551	-1
Lowdose_2rad_IMAC_MSA1	11311	1	3	5.0773	794.5	0.51555	0.718018	2.9405	0	DSQDAS*AEQSDHDDEVASLASASGGFGTK	1676.54	12.2767	-1	-1
Lowdose_2rad_IMAC_MSA1	9958	1	2	5.0691	670	0.437395	0.661358	4.81367	0	AAS*LNYLNQPSAAPLQVSR	2614.77	97.2212	-1	-1
Lowdose_2rad_IMAC_MSA1	6168	1	2	5.0671	568.6	0.381816	0.617913	5.6858	2e-06	SRS*DIDVNAAAGAK	1456.95	46.5836	-1	-1
Lowdose_2rad_IMAC_MSA1	6334	1	3	5.0584	489.4	0.415151	0.644322	5.63174	3e-06	KVEEEGS*PGDPDHEASTQGR	1585.75	151.872	-1	-1
Lowdose_2rad_IMAC_MSA1	9788	1	2	5.0538	219.7	0.389232	0.623885	2.54914	6e-06	SLSNS*NPDISGTPTSPDDEVR	1427.62	21.8934	-1	-1
Lowdose_2rad_IMAC_MSA1	9170	1	3	5.048	419.2	0.367056	0.605851	5.45177	1.7e-05	KQSFDDNDS*EELEDKDSK	1006.69	40.173	-1	-1
Lowdose_2rad_IMAC_MSA1	13909	1	2	5.0463	925.9	0.465371	0.682181	4.44228	0	YVASYLLAALGGNSS*PSAK	2761.16	66.4386	-1	-1
Lowdose_2rad_IMAC_MSA1	6550	1	3	5.0461	705.1	0.433959	0.658756	6.26468	1e-06	SHT*SEGAHLDITPNSGAAGNSAGPK	2353.05	27.3069	-1	-1
Lowdose_2rad_IMAC_MSA1	13624	1	3	5.0435	311.9	0.327352	0.572147	3.62229	9.4e-05	TLHCEGTEINS*DDEQESKEVEETATAK	1091.66	19.2193	-1	-1
Lowdose_2rad_IMAC_MSA1	8290	1	3	5.0418	854.4	0.532131	0.729473	4.76753	0	GHYEVTGS*DDETGKLQGSGVSLASK	1602.92	0	-1	-1
Lowdose_2rad_IMAC_MSA1	11275	1	3	5.0345	336.7	0.30289	0.550354	4.00551	0.000178	KLGDVSPT*QIDVSQFGSFKEDTK	1228.6	21.8934	-1	-1
Lowdose_2rad_IMAC_MSA1	7532	1	2	5.0344	414.6	0.563741	0.750827	2.53569	0	AQS*SPAAPASLSAPEPASQAR	2456.78	66.4386	-1	-1
Lowdose_2rad_IMAC_MSA1	12589	1	2	5.0342	611.9	0.469191	0.684975	2.52099	0	QALDYVELSPLTQAS*PQR	2026.51	60.8236	-1	-1
Lowdose_2rad_IMAC_MSA1	11380	1	2	5.0325	960.7	0.467322	0.68361	0.531035	0	YESQEPLAGQES*PLPLATR	2602.49	81.9015	-1	-1
Lowdose_2rad_IMAC_MSA1	14056	1	3	5.031	651.6	0.493143	0.702241	4.58279	0	S*SKAS*LGSLEGEAEAEASSPK	1510.68	0	0	-1
Lowdose_2rad_IMAC_MSA1	5270	1	2	5.0304	505.4	0.431298	0.656733	6.13242	1e-06	LGASNS*PGQPNSVK	2096.47	61.4337	-1	-1
Lowdose_2rad_IMAC_MSA1	7843	1	3	5.0303	425.9	0.23933	0.489214	3.77247	0.000605	STAQQELDGKPAS*PTPVIVASHTANKEEK	2430.09	0	-1	-1
Lowdose_2rad_IMAC_MSA1	11382	1	3	5.027	501.7	0.45192	0.67225	5.12584	1e-06	YESQEPLAGQES*PLPLATR	1981.44	70.2719	-1	-1
Lowdose_2rad_IMAC_MSA1	8644	1	3	5.0251	467.3	0.528188	0.726765	4.89045	0	LGHPEALSAGTGS*PQPPSFTYAQQR	3142.2	77.8778	-1	-1
Lowdose_2rad_IMAC_MSA1	4839	1	2	5.024	470.3	0.466342	0.682892	1.37911	0	KDDDS*DDESQSSHTGK	1660.8	133.519	-1	-1
Lowdose_2rad_IMAC_MSA1	8570	1	2	5.023	894.1	0.416703	0.645525	3.67647	0	TDSREDEIS*PPPPNPVVK	2330.84	63.6392	-1	-1
Lowdose_2rad_IMAC_MSA1	4504	1	3	5.0197	371.3	0.348387	0.590243	7.64901	4.8e-05	KETQS*PEQVKSEK	836.807	14.1132	-1	-1
Lowdose_2rad_IMAC_MSA1	9809	1	2	5.0154	610.2	0.459505	0.677868	4.67973	0	KTGS*YGALAEITASK	2123.06	66.4386	-1	-1
Lowdose_2rad_IMAC_MSA1	6194	1	3	5.0142	559.4	0.400802	0.633089	5.18612	4e-06	KSLPAPVAQRPDS*PGGGLQAPGQK	1597.19	109.786	-1	-1
Lowdose_2rad_IMAC_MSA1	11520	1	3	5.0141	653.3	0.427355	0.653724	2.48047	1e-06	NLNIINTHAYNQPEDLVYS*QPEMR	2956.7	0	-1	-1
Lowdose_2rad_IMAC_MSA1	11543	1	3	5.0099	427.5	0.533903	0.730687	4.06976	0	QRS*PLLNQPVPELSHASLIANQSPFR	1128.62	119.681	-1	-1
Lowdose_2rad_IMAC_MSA1	11847	1	3	5.0092	602.8	0.514653	0.717393	4.46482	0	PLS*PVPHVNNVVNAPLSINIPR	2717.68	325.781	-1	-1
Lowdose_2rad_IMAC_MSA1	13846	1	2	5.0039	416.9	0.543876	0.737479	5.08314	0	SLST*SGESLYHVLGLDK	1904.3	40.5889	-1	-1
Lowdose_2rad_IMAC_MSA1	14979	1	3	5.0034	523.3	0.346464	0.588612	5.81151	1.7e-05	KET*ES*EAEDNLDDLEK	-1	-1	-1	-1
Lowdose_2rad_IMAC_MSA1	13373	1	3	5.0013	440.8	0.351649	0.593	-0.078293	2.5e-05	S*TSTPNVHMVSTTAPMDSNLIQLTGQSFSTDAAGSR	1666.01	0	-1	-1
Lowdose_2rad_IMAC_MSA1	12839	1	2	4.9993	400.4	0.441022	0.664095	3.16161	1e-06	TES*PATAAETASEELDNR	2316.83	27.0275	-1	-1
Lowdose_2rad_IMAC_MSA1	13445	1	3	4.9981	884.1	0.522138	0.722591	7.48454	0	KETES*EAEDNLDDLEK	2201.95	27.3069	-1	-1
Lowdose_2rad_IMAC_MSA1	8346	1	2	4.9954	224.6	0.501822	0.708394	-2.97273	0	VSEEQTQPPS*PAGAGMSTAMGR	1932.5	95.6345	-1	-1
Lowdose_2rad_IMAC_MSA1	7349	1	2	4.9924	614.1	0.48702	0.697868	4.5397	0	GYYS*PYSVSGSGSTAGSR	2476.29	66.4386	-1	-1
Lowdose_2rad_IMAC_MSA1	15434	1	3	4.9924	1014.5	0.510616	0.714574	5.23764	0	S*TPPPNNLVNPVQELETER	1613.73	0	-1	-1
Lowdose_2rad_IMAC_MSA1	13272	1	3	4.9879	1055.5	0.469135	0.684934	7.34356	0	ANS*FVGTAQYVSPELLTEK	2800.1	33.5346	-1	-1
Lowdose_2rad_IMAC_MSA1	8899	1	3	4.9846	533	0.332023	0.576214	4.08011	2.5e-05	RPGQSFHVNSEVNS*VLSPR	1184.72	33.936	-1	-1
Lowdose_2rad_IMAC_MSA1	7767	1	2	4.9839	336.1	0.449648	0.670558	4.00385	1e-06	AQGEPVAGHES*PKIPYEK	683.259	112.33	-1	-1
Lowdose_2rad_IMAC_MSA1	13270	1	2	4.9839	1577.1	0.505046	0.710666	6.80471	0	SYS*LSELSVLQAK	2097.25	50.5889	-1	-1
Lowdose_2rad_IMAC_MSA1	8654	1	2	4.9824	374.8	0.472202	0.68717	0	0	KGS*PSAQSFEELQSQR	2092.83	56.5109	-1	-1
Lowdose_2rad_IMAC_MSA1	11492	1	2	4.9809	217.3	0.540163	0.734958	8.01666	0	KLEKEEEEGIS*QES*S*EEEQ	-1	-1	-1	-1
Lowdose_2rad_IMAC_MSA1	11570	1	2	4.9794	703.6	0.444351	0.666597	4.55761	0	RIDFIPVS*PAPS*PTR	1490.86	73.3033	0	-1
Lowdose_2rad_IMAC_MSA1	12331	1	3	4.9742	289.3	0.28288	0.531865	2.49516	0.000448	RDPSSNDINGGMEPTPSTVSTPS*PSADLLGLR	1950.99	40.9493	-1	-1
Lowdose_2rad_IMAC_MSA1	12943	1	3	4.9703	239.9	0.587932	0.766767	1.47048	0	GIPLATGDTS*PEPELLPGAPLPPPKEVINGNIK	1060.36	23.9593	-1	-1
Lowdose_2rad_IMAC_MSA1	2945	1	3	4.967	406.5	0.41665	0.645484	5.87134	6e-06	GRAS*SHSSQTQGGGSVTK	775.883	0	-1	-1
Lowdose_2rad_IMAC_MSA1	5492	1	2	4.9638	508.7	0.477638	0.691114	-0.533807	0	FIHQQPQSSS*PVYGSSAK	2314.48	21.8934	-1	-1
Lowdose_2rad_IMAC_MSA1	5739	1	2	4.9596	594.7	0.378035	0.614846	3.33187	2e-06	NSSNTSVGS*PSNTIGR	2453.8	31.2397	-1	-1
Lowdose_2rad_IMAC_MSA1	8548	1	3	4.9583	1169.7	0.411593	0.641555	6.23513	0	VPKPEPIPEPKEPS*PEK	-1	-1	-1	-1
Lowdose_2rad_IMAC_MSA1	9794	1	2	4.9567	242.7	0.366635	0.605504	3.59702	1.1e-05	SLSNS*NPDISGTPTSPDDEVR	1274.39	15.3994	-1	-1
Lowdose_2rad_IMAC_MSA1	6376	1	2	4.9548	533.3	0.491745	0.701245	4.85918	0	KAEGEPQEES*PLKSK	1470.16	5.657	-1	-1
Lowdose_2rad_IMAC_MSA1	13439	1	2	4.9503	1317.9	0.47185	0.686913	3.76158	0	KETES*EAEDNLDDLEK	2564.39	47.851	-1	-1
Lowdose_2rad_IMAC_MSA1	13749	1	3	4.9499	639.4	0.466979	0.683359	5.74888	0	NAIS*LPQLNQAAYDSLVVGK	1717.54	120.456	-1	-1
Lowdose_2rad_IMAC_MSA1	9566	1	3	4.9488	373.7	0.461021	0.678985	7.33008	2e-06	DRS*SPPPGYIPDELHQVAR	1785.22	0	-1	-1
Lowdose_2rad_IMAC_MSA1	8047	1	2	4.9456	276.4	0.353284	0.594377	2.0297	1.1e-05	WLNSGRGDEASEEGQNGSS*PK	2169.16	40.5889	-1	-1
Lowdose_2rad_IMAC_MSA1	12298	1	3	4.944	848.8	0.616646	0.785268	5.49407	0	KLGDVSPT*QIDVSQFGSFK	2035.52	0	-1	-1
Lowdose_2rad_IMAC_MSA1	11051	1	2	4.9399	924.5	0.532561	0.729768	4.13467	0	KLEKEEEEGISQES*S*EEEQ	2076.3	124.705	87.661	-1
Lowdose_2rad_IMAC_MSA1	12061	1	3	4.9386	417.1	0.390759	0.625107	4.84989	9e-06	SNS*APLIHGLSDTSPVFQAEAPSAR	1615.98	0	-1	-1
Lowdose_2rad_IMAC_MSA1	13853	1	2	4.9307	706.8	0.557933	0.746949	3.24699	0	SLS*TSGESLYHVLGLDK	2055.67	0	-1	-1
Lowdose_2rad_IMAC_MSA1	10898	1	2	4.9255	862.7	0.364024	0.603344	5.92103	2e-06	DMES*PTKLDVTLAK	1711.6	107.22	-1	-1
Lowdose_2rad_IMAC_MSA1	14140	1	3	4.9241	396.5	0.410694	0.640854	5.44791	6e-06	SSS*PAPADIAQTVQEDLR	1240.71	0	-1	-1
Lowdose_2rad_IMAC_MSA1	8526	1	3	4.9173	573.8	0.578081	0.760316	6.20818	0	AMADELS*EKQVYDAHTK	1177.88	76.8895	-1	-1
Lowdose_2rad_IMAC_MSA1	6003	1	3	4.9172	1032.1	0.405495	0.636785	6.29396	1e-06	RRS*QS*IEQESQEK	1842.84	194.504	158.816	-1
Lowdose_2rad_IMAC_MSA1	5429	1	2	4.9133	211.1	0.33855	0.58185	0.31414	3.1e-05	ILEQQNSSRT*LEKNK	1223.78	40.9493	-1	-1
Lowdose_2rad_IMAC_MSA1	13890	1	3	4.9122	1044	0.313017	0.559479	2.64341	9e-06	PSTQPRPDS*WGEDNWEGLETDSR	2122.77	89.8873	-1	-1
Lowdose_2rad_IMAC_MSA1	11912	1	3	4.9057	900	0.499093	0.706465	5.73521	0	SVS*TTNIAGHFNDESPLGLR	1309.78	0	-1	-1
Lowdose_2rad_IMAC_MSA1	5368	1	3	4.9001	509.6	0.522704	0.722983	5.61682	0	SKS*QSSGSSATHPISVPGAR	1671	87.4145	-1	-1
Lowdose_2rad_IMAC_MSA1	14071	1	3	4.9001	1015.1	0.393155	0.627021	4.34281	1e-06	IEDS*EPHIPLIDDTDAEDDAPTK	2409.88	307.75	-1	-1
Lowdose_2rad_IMAC_MSA1	12655	1	3	4.8999	331	0.460622	0.678691	4.5056	3e-06	EATSDPS*RTPEEEPLNLEGLVAHR	1658.29	0	-1	-1
Lowdose_2rad_IMAC_MSA1	9679	1	3	4.8975	550.9	0.268504	0.518174	5.9443	0.000178	STRS*VENLPECGITHEQR	2341.76	25.8184	-1	-1
Lowdose_2rad_IMAC_MSA1	12748	1	3	4.895	258.7	0.346762	0.588865	3.47173	9.4e-05	VATLNS*EEESDPPTYKDAFPPLPEK	1885.1	88.0884	-1	-1
Lowdose_2rad_IMAC_MSA1	7126	1	3	4.8941	414.6	0.502319	0.708745	8.01402	1e-06	FAS*DDEHDEHDENGATGPVKR	1626.52	193.866	-1	-1
Lowdose_2rad_IMAC_MSA1	12041	1	2	4.8918	660.6	0.283045	0.53202	4.5245	2.2e-05	MSPNETLFLES*TNK	1274.82	36.4386	-1	-1
Lowdose_2rad_IMAC_MSA1	9293	1	2	4.8909	881.5	0.351898	0.59321	4.95738	3e-06	SRS*GEGEVSGLMR	1493.42	46.5836	-1	-1
Lowdose_2rad_IMAC_MSA1	6294	1	2	4.888	367.4	0.484922	0.696363	0.261707	0	SDKS*PDLAPTPAPQSTPR	1999.54	85.6197	-1	-1
Lowdose_2rad_IMAC_MSA1	10517	1	3	4.8864	464	0.315856	0.562011	6.00459	6.7e-05	TFLDKDAQRLS*PIPEEVPK	1083.51	72.3384	-1	-1
Lowdose_2rad_IMAC_MSA1	7558	1	4	4.8849	281.5	0.547811	0.740143	6.28946	0	SKGHYEVTGS*DDETGKLQGSGVSLASK	1819.01	2.1744	-1	-1
Lowdose_2rad_IMAC_MSA1	11077	3	3	4.8844	469.5	0.504791	0.710486	5.98725	0	TPS*SEEISPTKFPGLYR	957.344	0	-1	-1
Lowdose_2rad_IMAC_MSA1	8478	1	3	4.8785	572.8	0.350641	0.592149	6.58464	1.2e-05	SGKNSQEDS*EDS*EDKDVK	611.345	21.4914	49.296	-1
Lowdose_2rad_IMAC_MSA1	5263	1	2	4.8784	664.3	0.423377	0.650674	5.96686	1e-06	LGASNS*PGQPNSVK	1242.14	28.097	-1	-1
Lowdose_2rad_IMAC_MSA1	12427	1	4	4.8747	444.5	0.580282	0.761762	7.82727	0	QGS*FTIEKPSPNIPIELIPHINK	1840.4	0	-1	-1
Lowdose_2rad_IMAC_MSA1	9482	1	2	4.8731	1022.2	0.465556	0.682317	4.18922	0	GKGFSVVADT*PELQR	1922.4	142.636	-1	-1
Lowdose_2rad_IMAC_MSA1	13692	1	2	4.8728	565.4	0.46776	0.68393	4.26411	0	KS*PNELVDDLFK	-1	-1	-1	-1
Lowdose_2rad_IMAC_MSA1	12967	1	2	4.87	507.6	0.484168	0.695822	4.17653	0	GLLSDS*MTDVPVDTGVAAR	2415.12	107.22	-1	-1
Lowdose_2rad_IMAC_MSA1	13282	1	3	4.8691	705	0.434803	0.659396	4.1742	1e-06	THTDSS*EKELEPEAAEEALENGPK	2428.75	0	-1	-1
Lowdose_2rad_IMAC_MSA1	12880	1	2	4.8675	569.9	0.507221	0.712194	5.5268	0	SLS*DFTGPPQLQALK	1487.97	0	-1	-1
Lowdose_2rad_IMAC_MSA1	14406	1	2	4.8633	418.6	0.369297	0.607698	8.61813	6e-06	SSKAS*LGS*LEGEAEAEASSPK	1540.95	31.2397	54.8418	-1
Lowdose_2rad_IMAC_MSA1	11853	1	3	4.8587	208.6	0.570235	0.755139	4.87572	1e-06	KLEKEEEEGIS*QES*S*EEEQ	-1	-1	-1	-1
Lowdose_2rad_IMAC_MSA1	12123	1	2	4.8554	836.7	0.546526	0.739274	3.73108	0	ILS*DVTHSAVFGVPASK	1862.42	87.4145	-1	-1
Lowdose_2rad_IMAC_MSA1	12775	1	2	4.8548	808.6	0.553782	0.744165	3.11164	0	RLS*LPGLLSQVS*PR	1678.18	173.952	54.6801	-1
Lowdose_2rad_IMAC_MSA1	11369	1	2	4.8512	260	0.539454	0.734475	7.83325	0	KLEKEEEEGIS*QES*S*EEEQ	-1	-1	-1	-1
Lowdose_2rad_IMAC_MSA1	14566	1	2	4.8511	824.4	0.484447	0.696022	9.12788	0	S*ASPDDDLGSSNWEAADLGNEER	2287.22	0	-1	-1
Lowdose_2rad_IMAC_MSA1	5546	1	3	4.8502	903.3	0.506433	0.711641	7.10384	0	YDERPGPS*PLPHR	1322.06	115.287	-1	-1
Lowdose_2rad_IMAC_MSA1	10622	1	3	4.8488	287.9	0.503217	0.709378	4.83633	1e-06	KPLPDHVSIVEPKDEILPT*TPISEQK	2370.26	0	-1	-1
Lowdose_2rad_IMAC_MSA1	3394	1	3	4.8487	1728.5	0.455669	0.675033	5.15446	0	HSTPSNSSNPSGPPS*PNSPHR	2854.3	32.8497	-1	-1
Lowdose_2rad_IMAC_MSA1	4685	1	2	4.8486	867.4	0.395784	0.629114	3.56199	1e-06	TSQVGAASAPAKES*PR	1291.72	75.5714	-1	-1
Lowdose_2rad_IMAC_MSA1	10850	1	3	4.8485	520.1	0.529421	0.727613	3.3515	0	LLKEGEEPTVY*SDEEEPKDESAR	1445.24	28.879	-1	-1
Lowdose_2rad_IMAC_MSA1	14641	1	3	4.8482	543.7	0.520131	0.721201	5.79693	0	S*SKAS*LGSLEGEAEAEASSPK	1349.08	0	0	-1
Lowdose_2rad_IMAC_MSA1	12135	1	3	4.8433	282.5	0.430884	0.656418	-2.62239	9e-06	S*DSPVPTAPTSGGPKPSTASAVPELATDPELEK	1005.37	0	-1	-1
Lowdose_2rad_IMAC_MSA1	12930	1	2	4.8428	1130.3	0.508652	0.713198	3.68138	0	SPFEIIS*PPAS*PPEMVGQR	2427.27	135.867	248.642	-1
Lowdose_2rad_IMAC_MSA1	14651	1	2	4.8401	338.8	0.348154	0.590046	3.12184	1.1e-05	LTDEDFS*PFGSGGGLFSGGK	1720.59	141.785	-1	-1
Lowdose_2rad_IMAC_MSA1	8658	1	2	4.8371	1306	0.465899	0.682568	5.5479	0	AQRLS*QETEALGR	2148.26	147.623	-1	-1
Lowdose_2rad_IMAC_MSA1	14345	1	3	4.8337	444.8	0.312369	0.5589	3.54651	6.7e-05	DVMS*DETNNEETESPSQEFVNITK	1737.57	36.9365	-1	-1
Lowdose_2rad_IMAC_MSA1	8044	1	2	4.8331	241.7	0.519253	0.720592	-0.874725	0	WLNSGRGDEASEEGQNGSS*PK	2492.35	0	-1	-1
Lowdose_2rad_IMAC_MSA1	9490	1	2	4.8326	1122.8	0.431362	0.656782	4.47314	0	GKGFSVVADT*PELQR	3004.47	100.631	-1	-1
Lowdose_2rad_IMAC_MSA1	11177	1	2	4.8308	609.4	0.515091	0.717698	5.77041	0	KLEKEEEEGISQES*S*EEEQ	1329.2	163.987	152.113	-1
Lowdose_2rad_IMAC_MSA1	3701	1	2	4.8297	462.3	0.591838	0.76931	4.1268	0	TGS*ESSQTGTSTTSSR	1632.57	28.879	-1	-1
Lowdose_2rad_IMAC_MSA1	15111	1	3	4.8246	719.1	0.384156	0.619803	5.3001	3e-06	KET*ES*EAEDNLDDLEK	-1	-1	-1	-1
Lowdose_2rad_IMAC_MSA1	9348	1	2	4.8238	1158.8	0.528504	0.726983	3.56351	0	ASRVPS*S*DEEVVEEPQSR	1582.21	87.4145	153.975	-1
Lowdose_2rad_IMAC_MSA1	14246	1	3	4.821	446.1	0.341236	0.584154	5.2281	3.5e-05	KYDLESAS*AILPSSAIEDPDLGSLGK	1170.28	0	-1	-1
Lowdose_2rad_IMAC_MSA1	14274	1	3	4.8201	648.7	0.503786	0.709779	3.72595	0	SSS*PAPADIAQTVQEDLR	2422.14	0	-1	-1
Lowdose_2rad_IMAC_MSA1	6569	1	3	4.819	631.4	0.360573	0.600477	2.64419	9e-06	GVHIHQAGGS*PPASSTSSSSLTNDVAK	978.099	115.04	-1	-1
Lowdose_2rad_IMAC_MSA1	10830	1	2	4.8181	233.2	0.623814	0.789819	11.1354	0	GLLAQGLRPES*PPPAGPLLNGAPAGESPQPK	1448.64	86.7648	-1	-1
Lowdose_2rad_IMAC_MSA1	11007	1	2	4.8177	551.9	0.486062	0.697181	4.82985	0	SLGLSLS*GGDQEDAGR	2207.45	57.9286	-1	-1
Lowdose_2rad_IMAC_MSA1	12582	1	2	4.8144	454.5	0.456838	0.675898	2.29648	0	QALDYVELSPLTQAS*PQR	1576.95	61.74	-1	-1
Lowdose_2rad_IMAC_MSA1	13264	1	2	4.8113	991.1	0.463991	0.681169	5.44769	0	SYS*LSELSVLQAK	2080.56	46.5836	-1	-1
Lowdose_2rad_IMAC_MSA1	11518	1	2	4.8093	219.6	0.577423	0.759884	-0.657229	0	KLEKEEEEGIS*QES*S*EEEQ	-1	-1	-1	-1
Lowdose_2rad_IMAC_MSA1	3034	1	2	4.804	279.5	0.64796	0.80496	5.04125	0	ASS*HSSQTQGGGSVTK	1840.5	36.4386	-1	-1
Lowdose_2rad_IMAC_MSA1	10079	1	2	4.8036	306.6	0.525523	0.72493	3.7437	0	KAEDS*DS*EPEPEDNVR	-1	-1	-1	-1
Lowdose_2rad_IMAC_MSA1	12189	1	3	4.8035	784.7	0.460893	0.678891	3.24395	0	KS*LDS*DESEDEEDDYQQK	2060.44	0	0	-1
Lowdose_2rad_IMAC_MSA1	9704	1	2	4.803	434	0.40558	0.636852	5.47329	2e-06	RLS*NVSLTGVSTIR	2072.66	136.532	-1	-1
Lowdose_2rad_IMAC_MSA1	9023	1	2	4.8024	624.6	0.452774	0.672885	4.35821	0	HVILSGS*TEVISNEGGR	2111.23	27.0275	-1	-1
Lowdose_2rad_IMAC_MSA1	10708	1	3	4.8007	406.4	0.472994	0.687746	5.10652	1e-06	VLVQNAAGS*QEKLAQAAQSSVATITR	1388.28	125.317	-1	-1
Lowdose_2rad_IMAC_MSA1	4554	1	2	4.7971	220.7	0.369348	0.60774	0.215364	1.6e-05	TNTMNGSKS*PVISRPK	1181.28	46.6551	-1	-1
Lowdose_2rad_IMAC_MSA1	12973	1	2	4.7954	191.9	0.560266	0.748509	4.41673	0	GLLSDS*MTDVPVDTGVAAR	2077	75.9104	-1	-1
Lowdose_2rad_IMAC_MSA1	4833	1	2	4.7951	494.3	0.356739	0.597276	1.31171	6e-06	KDDDS*DDESQSSHTGK	1589.05	61.2862	-1	-1
Lowdose_2rad_IMAC_MSA1	11786	1	3	4.7951	691.5	0.489729	0.699806	6.45928	0	RNS*SEASSGDFLDLK	2466.58	40.807	-1	-1
Lowdose_2rad_IMAC_MSA1	7015	1	3	4.7942	794.7	0.362021	0.601682	4.88384	4e-06	KPSGLNGEASKS*QEMVHLVNK	1939.95	87.4145	-1	-1
Lowdose_2rad_IMAC_MSA1	7551	1	4	4.7931	313.6	0.458618	0.677213	5.36128	0	SKGHYEVTGS*DDETGKLQGSGVSLASK	2285.73	36.9365	-1	-1
Lowdose_2rad_IMAC_MSA1	8884	1	2	4.7922	317.1	0.526543	0.725633	2.47465	0	AAS*PPASASDLIEQQQK	1917.97	110.01	-1	-1
Lowdose_2rad_IMAC_MSA1	9004	1	3	4.7901	521.2	0.29776	0.545674	1.59942	6.7e-05	LPNTYPNS*SSPGPGGLGGSVHYATMAR	1645.65	35.1743	-1	-1
Lowdose_2rad_IMAC_MSA1	9916	1	3	4.7898	625.1	0.376613	0.613688	5.57679	6e-06	HIKEEPLS*EEEPCTSTAIASPEKK	1324.11	75.786	-1	-1
Lowdose_2rad_IMAC_MSA1	11343	1	2	4.7875	547.9	0.500094	0.707173	4.11637	0	RSS*GFISELPSEEGK	1184.25	56.4386	-1	-1
Lowdose_2rad_IMAC_MSA1	7620	1	3	4.7874	620.7	0.337845	0.581244	6.10083	1.7e-05	ISS*KSPGHMVILDQTK	1808.1	61.565	-1	-1
Lowdose_2rad_IMAC_MSA1	10705	1	3	4.7856	796.5	0.4557	0.675056	6.76532	0	VRGEVAPDAKS*FVLNLGK	-1	-1	-1	-1
Lowdose_2rad_IMAC_MSA1	13211	1	3	4.7851	532.4	0.477378	0.690925	5.2274	1e-06	ELSNS*PLRENSFGS*PLEFR	1927.99	42.5705	90.3237	-1
Lowdose_2rad_IMAC_MSA1	14919	1	2	4.7833	434.1	0.414923	0.644145	3.27769	1e-06	KET*ES*EAEDNLDDLEK	-1	-1	-1	-1
Lowdose_2rad_IMAC_MSA1	14854	1	3	4.7791	582.3	0.28564	0.534453	5.38378	9.4e-05	KET*ES*EAEDNLDDLEK	-1	-1	-1	-1
Lowdose_2rad_IMAC_MSA1	4308	1	3	4.779	587.5	0.357104	0.597582	6.87266	1.2e-05	KVS*KQEEASGGPTAPK	326.561	115.429	-1	-1
Lowdose_2rad_IMAC_MSA1	9571	1	3	4.7755	318.4	0.247932	0.497928	-1.73609	0.001084	VVDYSQFQES*DDADEDYGRDSGPPTKK	567.553	33.8331	-1	-1
Lowdose_2rad_IMAC_MSA1	5556	1	2	4.7725	358.7	0.306485	0.553611	9.46733	3.1e-05	STTSQVTPAEEKDGHS*PMSK	1376.68	0	-1	-1
Lowdose_2rad_IMAC_MSA1	9016	1	3	4.7708	405	0.401107	0.63333	5.01148	9e-06	MRS*PQPARPGSAAVPGAAFAPIPR	1325.98	47.4674	-1	-1
Lowdose_2rad_IMAC_MSA1	11537	1	3	4.7682	304.4	0.343316	0.585932	3.40144	9.4e-05	QRS*PLLNQPVPELSHASLIANQSPFR	746.845	53.896	-1	-1
Lowdose_2rad_IMAC_MSA1	13524	1	3	4.7601	296	0.314069	0.560419	4.57168	0.000178	NKLEGDS*DVDS*ELEDRVDGVK	-1	-1	-1	-1
Lowdose_2rad_IMAC_MSA1	9243	1	2	4.7598	437.3	0.396865	0.629972	2.38106	3e-06	AQTLPTSVVTITSES*SPGKR	1417.39	0	-1	-1
Lowdose_2rad_IMAC_MSA1	14147	1	2	4.7595	513.8	0.454838	0.674417	4.44344	0	SSS*PAPADIAQTVQEDLR	3015.03	0	-1	-1
Lowdose_2rad_IMAC_MSA1	7774	1	2	4.7582	503.6	0.497562	0.705381	4.00385	0	AQGEPVAGHES*PKIPYEK	1366	100.508	-1	-1
Lowdose_2rad_IMAC_MSA1	12774	1	2	4.7576	277.4	0.373066	0.610791	2.4214	8e-06	SYS*SPDITQAIQEEEKR	1467.1	0	-1	-1
Lowdose_2rad_IMAC_MSA1	8439	1	2	4.7571	397	0.343529	0.586113	-0.783239	1.1e-05	FAS*DDEHDEHDENGATGPVK	2323.98	296.636	-1	-1
Lowdose_2rad_IMAC_MSA1	11749	1	2	4.7562	1195.2	0.333628	0.577605	5.29293	3e-06	GFGFGQGAGALVHS*E	-1	-1	-1	-1
Lowdose_2rad_IMAC_MSA1	8422	1	3	4.7534	734.7	0.461775	0.67954	5.58005	0	FAS*DDEHDEHDENGATGPVK	1774.23	140.014	-1	-1
Lowdose_2rad_IMAC_MSA1	9477	1	3	4.7532	887.4	0.388707	0.623464	7.94388	1e-06	GKGFSVVADT*PELQR	1398.11	182.391	-1	-1
Lowdose_2rad_IMAC_MSA1	9927	1	3	4.7504	406.5	0.28326	0.532222	6.21484	0.000243	NKPGPNIES*GNEDDDASFK	1617.62	94.4593	-1	-1
Lowdose_2rad_IMAC_MSA1	12924	1	3	4.7499	279.7	0.391356	0.625585	5.51315	3.5e-05	NDARS*PGSISYLPSFFTK	1131.23	35.3144	-1	-1
Lowdose_2rad_IMAC_MSA1	7747	1	3	4.7466	683.9	0.391859	0.625986	6.47051	3e-06	GKS*ESQMDITDINTPKPK	2544.46	56.503	-1	-1
Lowdose_2rad_IMAC_MSA1	9032	1	2	4.7432	363.5	0.370994	0.609093	0.645218	6e-06	RIDFTPVS*PAPS*PTR	1208.73	97.4119	0	-1
Lowdose_2rad_IMAC_MSA1	4046	1	2	4.7407	422	0.409054	0.639573	4.32436	2e-06	PGPTPSGTNVGSS*GRSPSK	1512.52	36.73	-1	-1
Lowdose_2rad_IMAC_MSA1	9239	1	2	4.7404	376.5	0.44165	0.664568	1.02903	1e-06	AQTLPTSVVTITSESS*PGKR	1343.03	0	-1	-1
Lowdose_2rad_IMAC_MSA1	11044	1	2	4.7393	641.5	0.546389	0.739181	3.46461	0	KLEKEEEEGISQES*S*EEEQ	1806.05	156.422	214.809	-1
Lowdose_2rad_IMAC_MSA1	9819	1	3	4.7366	754.2	0.527763	0.726473	6.36219	0	KTGSY*GALAEITASK	1687.9	0	-1	-1
Lowdose_2rad_IMAC_MSA1	15109	1	3	4.7364	278.2	0.35185	0.593169	3.81518	9.4e-05	TGSS*SPPGGPPKPGSQLDSMLGSLQSDLNK	1971.08	0	-1	-1
Lowdose_2rad_IMAC_MSA1	12681	1	3	4.7362	414	0.397492	0.63047	1.07738	9e-06	MLPHAPGVQMQAIPEDAIPEES*GDEDEDDPDKR	-1	-1	-1	-1
Lowdose_2rad_IMAC_MSA1	10274	1	2	4.7349	442.9	0.315487	0.561682	2.69014	2.2e-05	YKDIIRQPS*EEEIIK	1609.77	170.328	-1	-1
Lowdose_2rad_IMAC_MSA1	14867	1	3	4.7342	418.7	0.333763	0.577722	3.63065	4.8e-05	ERPISLGIFPLPAGDGLLT*PDAQK	2476.28	280.265	-1	-1
Lowdose_2rad_IMAC_MSA1	10976	1	3	4.7339	404.4	0.432941	0.657983	1.75181	4e-06	GPPDFSS*DEEREPT*PVLGSGAAAAGR	1680.99	23.9593	0	-1
Lowdose_2rad_IMAC_MSA1	11802	1	2	4.7325	659.7	0.610523	0.78136	-0.163724	0	SAMDSPVPASMFAPEPSS*PGAAR	2514.99	50.5889	-1	-1
Lowdose_2rad_IMAC_MSA1	12585	1	3	4.7315	981	0.473571	0.688165	4.05617	0	RVS*VCAETYNPDEEEEDTDPR	2191.58	7.3609	-1	-1
Lowdose_2rad_IMAC_MSA1	5491	1	3	4.7308	418.9	0.373256	0.610947	6.34691	1.7e-05	FIHQQPQSSS*PVYGSSAK	1439.46	40.807	-1	-1
Lowdose_2rad_IMAC_MSA1	7476	1	2	4.7267	1026	0.395858	0.629172	4.5397	1e-06	GYYSPYSVSGSGS*TAGSR	1944.15	0	-1	-1
Lowdose_2rad_IMAC_MSA1	13284	1	3	4.7239	292.9	0.54455	0.737936	4.50192	1e-06	MVIQGPSS*PQGEAMVTDVLEDQKEGR	1543.49	33.5845	-1	-1
Lowdose_2rad_IMAC_MSA1	7908	1	2	4.7219	311.1	0.457718	0.676549	3.89377	1e-06	KGAGDGS*DEEVDGKADGAEAKPAE	-1	-1	-1	-1
Lowdose_2rad_IMAC_MSA1	13035	1	3	4.7195	756.8	0.396038	0.629316	4.60534	2e-06	RGSGDT*SSLIDPDTSLSELR	1695.83	0	-1	-1
Lowdose_2rad_IMAC_MSA1	8510	1	3	4.7182	529	0.369866	0.608166	6.12934	1.2e-05	RKELEEVS*PETPVVPATTQR	1506.77	80.5339	-1	-1
Lowdose_2rad_IMAC_MSA1	7720	1	3	4.7171	269.4	0.504038	0.709956	5.09245	2e-06	VNHEPEPAGGATPGATLPKS*PSQLR	1526.42	0	-1	-1
Lowdose_2rad_IMAC_MSA1	4201	1	2	4.7146	748.2	0.562656	0.750104	2.26876	0	SQSS*DTEQQSPTSGGGK	2790.61	43.2193	-1	-1
Lowdose_2rad_IMAC_MSA1	11408	1	2	4.7119	778.4	0.398459	0.631236	4.40527	1e-06	S*AGEEEDGPVLTDEQK	1998.79	258.179	-1	-1
Lowdose_2rad_IMAC_MSA1	14571	1	2	4.709	508.6	0.547823	0.740151	1.04297	0	S*ASPDDDLGSSNWEAADLGNEER	2823.13	0	-1	-1
Lowdose_2rad_IMAC_MSA1	8612	1	3	4.7072	331.4	0.535371	0.731691	4.98897	0	S*RS*RDS*GDENEPIQER	-1	-1	-1	-1
Lowdose_2rad_IMAC_MSA1	13699	1	3	4.7058	393.2	0.401738	0.633828	4.98898	9e-06	SS*KAS*LGSLEGEAEAEASSPK	1455.28	31.0284	13.5686	-1
Lowdose_2rad_IMAC_MSA1	5002	1	3	4.7052	395.6	0.398602	0.631349	5.41218	9e-06	IDASKNEEDEGHSNS*SPR	1526.51	42.0128	-1	-1
Lowdose_2rad_IMAC_MSA1	9393	1	3	4.7044	451	0.436017	0.660316	5.69701	3e-06	KLAAGHELQPLAIVDQRPSS*R	1243.57	0	-1	-1
Lowdose_2rad_IMAC_MSA1	8651	1	3	4.7027	240.2	0.400727	0.63303	3.25474	3.5e-05	GLAEVQQDGEAEEGAT*SDGEKKR	1339.13	0	-1	-1
Lowdose_2rad_IMAC_MSA1	11777	1	2	4.7011	860.4	0.28338	0.532334	5.97034	2.2e-05	GGSISVQVNSIKFDS*E	2057.99	106.075	-1	-1
Lowdose_2rad_IMAC_MSA1	13646	1	3	4.6992	162	0.253469	0.503457	8.29329	0.003276	TLHCEGTEINS*DDEQESKEVEETATAK	945.254	35.7861	-1	-1
Lowdose_2rad_IMAC_MSA1	7538	1	2	4.6984	358.3	0.454516	0.674178	3.46338	1e-06	AQS*SPAAPASLSAPEPASQAR	2001.6	43.2193	-1	-1
Lowdose_2rad_IMAC_MSA1	10799	1	2	4.6976	521.9	0.395287	0.628719	-2.69601	2e-06	KLEKEEEEGISQES*S*EEEQ	1803.78	109.531	152.113	-1
Lowdose_2rad_IMAC_MSA1	8948	1	3	4.697	445.6	0.2934	0.541664	2.62067	0.000129	AGMSSNQSIS*SPVLDAVPRT*PSR	1260.3	0	0	-1
Lowdose_2rad_IMAC_MSA1	12630	1	3	4.6948	490	0.35846	0.598715	3.907	1.7e-05	RAS*VCAEAYNPDEEEDDAESR	1340.46	9.6487	-1	-1
Lowdose_2rad_IMAC_MSA1	8398	1	2	4.6914	265	0.302703	0.550185	5.80397	6.1e-05	S*GSNGSVVSLEQQQK	1301.71	56.5109	-1	-1
Lowdose_2rad_IMAC_MSA1	5165	1	3	4.6904	328.8	0.549527	0.741301	4.45066	0	DSPSKSS*AEAQTPEDTPNKSGAEAK	1684.1	0	-1	-1
Lowdose_2rad_IMAC_MSA1	9366	1	3	4.6896	387.5	0.426006	0.652691	4.66866	6e-06	SKPVLEPLT*PPLGS*PRPR	924.78	137.551	141.421	-1
Lowdose_2rad_IMAC_MSA1	9305	1	2	4.6895	1587.3	0.345879	0.588115	5.29874	1e-06	RGES*LDNLDSPR	1976.84	161.816	-1	-1
Lowdose_2rad_IMAC_MSA1	5451	1	2	4.6888	558.9	0.386687	0.621842	0.897838	3e-06	VQEKPDS*PGGSTQIQR	1826.57	127.099	-1	-1
Lowdose_2rad_IMAC_MSA1	11381	1	4	4.6878	343.4	0.477089	0.690716	2.65106	0	GS*NPLDGRDSPSAGGPVGQLEPIPIPAPASPGTRPTLK	1305.69	0.4677	-1	-1
Lowdose_2rad_IMAC_MSA1	12806	1	2	4.6829	904.2	0.473275	0.68795	-0.571172	0	SPFEIIS*PPAS*PPEMVGQR	1640.2	152.113	230.671	-1
Lowdose_2rad_IMAC_MSA1	4099	1	3	4.6825	561.3	0.475729	0.689731	6.8817	0	SVGKVEPSSQSPGRS*PR	1224.57	48.5699	-1	-1
Lowdose_2rad_IMAC_MSA1	10722	1	3	4.681	619.4	0.464986	0.681899	5.10652	0	VLVQNAAGS*QEKLAQAAQSSVATITR	1570.72	106.995	-1	-1
Lowdose_2rad_IMAC_MSA1	4352	1	2	4.6808	638	0.385447	0.620844	4.33086	2e-06	RPEGPGAQAPSS*PR	2542.66	36.4386	-1	-1
Lowdose_2rad_IMAC_MSA1	4642	1	2	4.6802	645.9	0.442673	0.665337	3.40292	0	KKEPAITS*QNSPEAR	1714.82	30.0722	-1	-1
Lowdose_2rad_IMAC_MSA1	12817	1	3	4.6791	203	0.447095	0.668652	4.74968	1.7e-05	HDSIPAADTFEDLS*DVEGGGSEPTQR	1101.55	65.4234	-1	-1
Lowdose_2rad_IMAC_MSA1	10470	1	3	4.6767	530.4	0.326534	0.571432	6.26877	3.5e-05	ISSGKS*SPFKVS*PLTFGR	726.271	0	40.1678	-1
Lowdose_2rad_IMAC_MSA1	12953	1	2	4.6742	173.3	0.324933	0.570029	5.79454	6.1e-05	SGSSS*PDSEITELKFPSINHD	1944.01	0	-1	-1
Lowdose_2rad_IMAC_MSA1	14350	1	3	4.6733	477.2	0.312392	0.55892	5.79502	6.7e-05	DVMSDET*NNEETESPSQEFVNITK	1649.6	0	-1	-1
Lowdose_2rad_IMAC_MSA1	14003	1	3	4.6714	1115.2	0.310763	0.557461	5.89749	9e-06	HS*TSGTDEGEDGDEPDDGSNDVVDLLPR	2378.83	28.879	-1	-1
Lowdose_2rad_IMAC_MSA1	11895	1	2	4.6673	398	0.364472	0.603715	3.26261	8e-06	DRPGS*PESPLLDAPFSR	1598.48	124.705	-1	-1
Lowdose_2rad_IMAC_MSA1	8710	1	2	4.6635	484.2	0.350702	0.592201	2.23919	8e-06	IEEVLSPEGSPSKS*PSK	1800.96	50.7334	-1	-1
Lowdose_2rad_IMAC_MSA1	2893	1	2	4.663	83.9	0.499571	0.706803	3.96372	3e-06	ASS*HSSQTQGGGSVTKK	1959.79	46.4386	-1	-1
Lowdose_2rad_IMAC_MSA1	9607	1	2	4.6626	461.9	0.494896	0.703488	3.97974	0	GSEGYLAATYPTVGQTS*PR	1373.26	50.5889	-1	-1
Lowdose_2rad_IMAC_MSA1	15105	1	3	4.661	699.3	0.35516	0.595953	5.81151	9e-06	KET*ES*EAEDNLDDLEK	-1	-1	-1	-1
Lowdose_2rad_IMAC_MSA1	13015	1	3	4.6594	811	0.3209	0.56648	5.19902	1.2e-05	SSKAS*LGSLEGEAEAEASSPK	1111.2	29.2276	-1	-1
Lowdose_2rad_IMAC_MSA1	7819	1	2	4.6559	358.4	0.555252	0.745152	5.52239	0	S*SSVGSSSSYPISPAVSR	2231.03	0	-1	-1
Lowdose_2rad_IMAC_MSA1	5703	1	2	4.6541	544.9	0.395028	0.628513	3.9384	2e-06	NDKS*EEEQSSSSVK	2057.98	68.6636	-1	-1
Lowdose_2rad_IMAC_MSA1	6201	1	3	4.6537	527.4	0.350066	0.591664	5.03597	1.7e-05	KSLPAPVAQRPDS*PGGGLQAPGQK	1842.71	138.954	-1	-1
Lowdose_2rad_IMAC_MSA1	10783	1	4	4.6531	472.6	0.353119	0.594238	4.41593	2e-06	GLLAQGLRPES*PPPAGPLLNGAPAGESPQPK	1306.94	26.2639	-1	-1
Lowdose_2rad_IMAC_MSA1	5789	1	3	4.6526	983.5	0.322572	0.567954	6.52906	9e-06	RPMEEDGEEKS*PSK	1044.28	61.565	-1	-1
Lowdose_2rad_IMAC_MSA1	12054	1	3	4.6504	457.4	0.480539	0.693209	4.1199	1e-06	ATLSSTSGLDLMSESGEGEIS*PQREVSR	2146.85	5.6165	-1	-1
Lowdose_2rad_IMAC_MSA1	6469	1	3	4.6456	492.1	0.337502	0.580949	5.42302	3.5e-05	YQQETSVSQLPGRPKS*PLSK	1374.53	0	-1	-1
Lowdose_2rad_IMAC_MSA1	13567	1	3	4.6421	338.1	0.418087	0.646596	5.60844	9e-06	TGSSSPPGGPPKPGSQLDSMLGS*LQSDLNK	1373.99	45.9602	-1	-1
Lowdose_2rad_IMAC_MSA1	10991	1	3	4.6406	554.8	0.415636	0.644698	5.46151	3e-06	GPPDFSS*DEEREPT*PVLGSGAAAAGR	2430.26	0	57.9279	-1
Lowdose_2rad_IMAC_MSA1	12057	1	3	4.6399	310.6	0.335029	0.578817	5.57401	9.4e-05	QGAIYHGLATLLNQPS*PMMQR	1326.29	213.925	-1	-1
Lowdose_2rad_IMAC_MSA1	10854	1	3	4.6344	267.9	0.23619	0.485994	4.2527	0.001905	VQSLEGEKLS*PKS*DISPLTPR	817.92	44.3027	0	-1
Lowdose_2rad_IMAC_MSA1	9634	1	3	4.6313	271.5	0.467061	0.683419	4.98285	4e-06	RRDEDMLYS*PELAQR	773.516	42.4793	-1	-1
Lowdose_2rad_IMAC_MSA1	11574	1	3	4.6309	577.9	0.516336	0.718565	3.49683	0	SLDS*DES*EDEEDDYQQKR	1799.24	25.8184	83.3212	-1
Lowdose_2rad_IMAC_MSA1	4113	1	2	4.6294	326.4	0.442606	0.665286	2.6256	1e-06	AEDGATPSPS*NETPKKK	2002.55	13.4503	-1	-1
Lowdose_2rad_IMAC_MSA1	8521	1	3	4.6288	367.1	0.308957	0.555839	5.68564	0.000129	AMADELS*EKQVYDAHTK	1567.07	138.099	-1	-1
Lowdose_2rad_IMAC_MSA1	7132	1	3	4.6285	316.3	0.446127	0.667927	4.87334	6e-06	MGPSGGEGMEPERRDS*QDGSSYR	1140.93	0	-1	-1
Lowdose_2rad_IMAC_MSA1	12760	1	2	4.6253	1731.2	0.63064	0.794128	3.41786	0	S*LDSDES*EDEEDDYQQK	1718.84	0	49.6047	-1
Lowdose_2rad_IMAC_MSA1	8795	1	2	4.6233	219.7	0.436831	0.660932	0.252606	3e-06	SS*SPGKLLGSGYGGLTGGSSR	2575.66	0	-1	-1
Lowdose_2rad_IMAC_MSA1	9570	1	2	4.6148	591.4	0.455166	0.67466	2.21984	0	GIS*QTNLITTVTPEKK	1225.29	132.877	-1	-1
Lowdose_2rad_IMAC_MSA1	12355	1	2	4.6145	368.5	0.460353	0.678493	0.015133	1e-06	IYHLPDAES*DEDEDFKEQTR	1765.12	106.697	-1	-1
Lowdose_2rad_IMAC_MSA1	13917	1	3	4.6126	257	0.397368	0.630371	5.66247	3.5e-05	S*DSPEIPFQAAAGPSDGLDASSPGNSFVGLR	2362.19	0	-1	-1
Lowdose_2rad_IMAC_MSA1	11779	1	3	4.6106	594.2	0.433761	0.658605	8.22452	1e-06	RNS*SEASSGDFLDLK	2194.86	40.807	-1	-1
Lowdose_2rad_IMAC_MSA1	7293	1	3	4.6096	740.2	0.5187	0.720208	4.74822	0	TPSPKEEDEEPES*PPEKK	1698.04	217.818	-1	-1
Lowdose_2rad_IMAC_MSA1	13463	1	2	4.6069	383.6	0.378259	0.615028	3.64869	6e-06	ASLGSLEGEAEAEASS*PK	1861.11	66.4386	-1	-1
Lowdose_2rad_IMAC_MSA1	11636	1	2	4.6042	1182.2	0.460167	0.678356	4.95361	0	LGEAS*DSELADADK	2500.04	61.9462	-1	-1
Lowdose_2rad_IMAC_MSA1	9954	1	2	4.6035	166	0.379993	0.616436	5.12292	2.2e-05	NKPGPNIES*GNEDDDASFK	1572.65	83.1368	-1	-1
Lowdose_2rad_IMAC_MSA1	12852	1	2	4.6011	430.5	0.495664	0.704034	4.3533	0	TES*PATAAETASEELDNR	1947.43	0	-1	-1
Lowdose_2rad_IMAC_MSA1	7007	1	4	4.6006	509.8	0.649807	0.806106	6.32794	0	KPSGLNGEASKS*QEMVHLVNK	2739.09	36.8721	-1	-1
Lowdose_2rad_IMAC_MSA1	8758	1	2	4.6002	324.5	0.400961	0.633215	8.87004	4e-06	SQS*LPNSLDYTQTSDPGR	1538.82	0	-1	-1
Lowdose_2rad_IMAC_MSA1	14061	1	3	4.5988	419.2	0.333631	0.577608	3.94372	4.8e-05	IEDS*EPHIPLIDDTDAEDDAPTK	1124.38	147.65	-1	-1
Lowdose_2rad_IMAC_MSA1	8892	1	2	4.5971	341.7	0.582867	0.763457	-0.144936	0	AAS*PPASASDLIEQQQK	2032.38	53.4269	-1	-1
Lowdose_2rad_IMAC_MSA1	10926	1	2	4.5967	549.6	0.463006	0.680445	0.094597	0	KLEKEEEEGISQES*S*EEEQ	1689.58	187.151	127.797	-1
Lowdose_2rad_IMAC_MSA1	12642	1	2	4.5966	1029.1	0.493212	0.702291	4.04826	0	S*LDSDES*EDEEDDYQQK	1539.46	0	49.6047	-1
Lowdose_2rad_IMAC_MSA1	11264	1	3	4.5966	480.1	0.343624	0.586195	5.28279	2.5e-05	TAT*CHSSSSPPIDAASAEPYGFR	1558.28	15.3994	-1	-1
Lowdose_2rad_IMAC_MSA1	12767	1	2	4.5935	1589.4	0.623272	0.789476	3.21202	0	S*LDSDES*EDEEDDYQQK	2375.53	0	55.4363	-1
Lowdose_2rad_IMAC_MSA1	11219	1	2	4.5934	1058.2	0.423216	0.650551	4.75473	0	SMS*DVSAEDVQNLR	1910.48	31.0284	-1	-1
Lowdose_2rad_IMAC_MSA1	8158	1	4	4.5933	518.7	0.468596	0.684541	2.96974	0	LQQGAGLESPQGQPEPGAAS*PQRQQDLHLESPQR	2510.55	48.7448	-1	-1
Lowdose_2rad_IMAC_MSA1	12015	1	3	4.5927	257.3	0.326061	0.571018	4.87572	0.000178	KLEKEEEEGIS*QES*S*EEEQ	-1	-1	-1	-1
Lowdose_2rad_IMAC_MSA1	12319	1	3	4.592	487.6	0.437195	0.661207	2.72794	2e-06	NSFSFS*DEKLNSPTDSTPALLSATVTPQK	1419.79	0	-1	-1
Lowdose_2rad_IMAC_MSA1	5500	1	2	4.5915	533.8	0.511293	0.715048	-0.533807	0	FIHQQPQSSS*PVYGSSAK	2274.85	18.1803	-1	-1
Lowdose_2rad_IMAC_MSA1	13208	1	4	4.5905	369.6	0.464655	0.681656	3.75859	0	LQALKEEPQTVPEMPGET*PPLS*PIDMESQER	1568.14	62.3939	62.0692	-1
Lowdose_2rad_IMAC_MSA1	9621	1	3	4.5892	280.7	0.399111	0.631752	5.61372	2.5e-05	RRDEDMLY*SPELAQR	1037.87	76.73	-1	-1
Lowdose_2rad_IMAC_MSA1	8203	1	4	4.5879	423.9	0.330064	0.574512	4.94802	6e-06	HSSDINHLVTQGRES*PEGSYTDDANQEVR	1128.81	4.2311	-1	-1
Lowdose_2rad_IMAC_MSA1	11130	1	2	4.5877	778.6	0.474355	0.688734	4.65608	0	GPRIS*APNVDFNLEGPK	-1	-1	-1	-1
Lowdose_2rad_IMAC_MSA1	6452	1	4	4.5862	481.2	0.521085	0.721862	4.36072	0	NYQQNYQNSES*GEKNEGSESAPEGQAQQR	2119.25	0	-1	-1
Lowdose_2rad_IMAC_MSA1	8779	1	3	4.5799	190.5	0.380773	0.617068	9.90966	9.4e-05	QEASTGQSPEDHASLAPPLS*PDHSSLEAK	724.855	12.2767	-1	-1
Lowdose_2rad_IMAC_MSA1	15440	1	2	4.5774	579.5	0.385197	0.620642	4.8046	3e-06	LDGLVET*PTGYIESLPR	2680.64	36.8721	-1	-1
Lowdose_2rad_IMAC_MSA1	5686	1	3	4.5774	531.4	0.35151	0.592883	7.16193	1.7e-05	ADS*DSEDKGEESKPK	722.645	52.255	-1	-1
Lowdose_2rad_IMAC_MSA1	8415	1	3	4.5774	842.5	0.465745	0.682455	5.19478	0	FAS*DDEHDEHDENGATGPVK	1414.51	243.321	-1	-1
Lowdose_2rad_IMAC_MSA1	14558	1	3	4.5708	837.8	0.47309	0.687815	4.1986	0	MPQDGS*DDEDEEWPTLEK	2133.32	315.175	-1	-1
Lowdose_2rad_IMAC_MSA1	13189	1	3	4.5702	1002.3	0.409238	0.639717	4.84483	1e-06	DLSSS*PPGPYGQEMYAFR	2591.99	28.879	-1	-1
Lowdose_2rad_IMAC_MSA1	4197	1	2	4.5669	515.7	0.559044	0.747692	8.83653	0	SQSS*DTEQQSPTSGGGK	2933.52	34.7393	-1	-1
Lowdose_2rad_IMAC_MSA1	6988	1	2	4.5668	619.1	0.413331	0.642908	5.11745	1e-06	TKDSGS*ISLQETR	991.704	35.1743	-1	-1
Lowdose_2rad_IMAC_MSA1	3949	1	2	4.5666	365	0.341282	0.584193	5.48645	1.6e-05	LGASNS*PGQPNSVKR	1150.2	56.5109	-1	-1
Lowdose_2rad_IMAC_MSA1	10924	1	3	4.5654	289.4	0.414597	0.643892	5.39349	1.7e-05	SAS*VNKEPVSLPGIMR	1665.48	15.3994	-1	-1
Lowdose_2rad_IMAC_MSA1	14151	1	3	4.5653	250.3	0.45767	0.676513	1.79772	9e-06	SMPVDERDLQAALT*PGALTAAAAGTGTQGPR	1073.91	30.2083	-1	-1
Lowdose_2rad_IMAC_MSA1	13065	1	3	4.5638	309.8	0.492506	0.701788	5.69372	2e-06	IFFDT*DDDDDMPHSTSR	2636.16	174.963	-1	-1
Lowdose_2rad_IMAC_MSA1	5682	1	2	4.5602	530.2	0.410421	0.640641	5.38637	1e-06	SGAQASSTPLSPT*R	1860.48	25.6136	-1	-1
Lowdose_2rad_IMAC_MSA1	11699	1	3	4.5578	296.4	0.538571	0.733874	4.87572	1e-06	KLEKEEEEGIS*QES*S*EEEQ	-1	-1	-1	-1
Lowdose_2rad_IMAC_MSA1	6711	1	2	4.5535	396.9	0.268343	0.518018	7.78254	0.000116	ILEQQNSSRT*LEK	605.087	40.3929	-1	-1
Lowdose_2rad_IMAC_MSA1	12396	1	3	4.553	524.2	0.582407	0.763156	3.96869	0	IYHLPDAES*DEDEDFKEQTR	1988.14	109.43	-1	-1
Lowdose_2rad_IMAC_MSA1	11678	1	3	4.5527	408.7	0.491818	0.701297	4.31402	1e-06	KLEKEEEEGIS*QES*S*EEEQ	-1	-1	-1	-1
Lowdose_2rad_IMAC_MSA1	7503	1	3	4.5485	112.5	0.38582	0.621144	1.5639	0.000331	RGEGDAPFSEPGTTSTQRPS*SPETATK	1110.07	27.0275	-1	-1
Lowdose_2rad_IMAC_MSA1	11588	1	2	4.5452	511.3	0.484423	0.696005	4.00326	0	SLDS*DES*EDEEDDYQQKR	1345.08	0	38.7971	-1
Lowdose_2rad_IMAC_MSA1	9824	1	3	4.5414	655	0.458867	0.677397	6.36219	1e-06	KTGSY*GALAEITASK	1901.08	0	-1	-1
Lowdose_2rad_IMAC_MSA1	3713	1	2	4.5397	332.7	0.51162	0.715276	2.24204	0	S*KVGSTENIKHQPGGGR	1173.61	46.6551	-1	-1
Lowdose_2rad_IMAC_MSA1	8143	1	4	4.5388	816.9	0.422138	0.649721	2.58135	0	LQQGAGLESPQGQPEPGAAS*PQRQQDLHLESPQR	1909.91	0	-1	-1
Lowdose_2rad_IMAC_MSA1	13383	1	2	4.5356	515.2	0.413242	0.642839	4.27424	1e-06	GGREGFES*DTDSEFTFK	736.945	61.565	-1	-1
Lowdose_2rad_IMAC_MSA1	4513	1	2	4.534	1004.2	0.292281	0.54063	4.61359	1.6e-05	KETQS*PEQVKSEK	2013.9	40.3036	-1	-1
Lowdose_2rad_IMAC_MSA1	11936	1	4	4.5329	392.3	0.506872	0.711949	2.68162	0	DS*SKGEDSAEETEAKPAVVAPAPVVEAVSTPSAAFPSDATAENVK	2180.85	0	-1	-1
Lowdose_2rad_IMAC_MSA1	6541	1	2	4.5314	274.6	0.548219	0.740418	0.009737	0	SPAVATSTAAPPPPSS*PLPSK	2876.2	92.8771	-1	-1
Lowdose_2rad_IMAC_MSA1	7934	1	2	4.5312	1291.8	0.375287	0.612607	5.24561	1e-06	SRDS*GDENEPIQER	2246.38	77.4174	-1	-1
Lowdose_2rad_IMAC_MSA1	11773	1	2	4.5301	542.2	0.351692	0.593036	4.46658	8e-06	GGSISVQVNSIKFDS*E	2223.3	121.477	-1	-1
Lowdose_2rad_IMAC_MSA1	12172	1	3	4.5274	721.7	0.412996	0.642648	6.29684	1e-06	KSLDS*DES*EDEEDDYQQK	1175.34	0	26.5872	-1
Lowdose_2rad_IMAC_MSA1	11776	1	2	4.5273	525.1	0.341771	0.584612	6.48199	1.1e-05	RNS*SEASSGDFLDLK	1327.12	66.4386	-1	-1
Lowdose_2rad_IMAC_MSA1	11422	1	2	4.5269	262.7	0.448519	0.669716	-1.63414	2e-06	DPGS*PGPFDYVGAPPAESIPQK	1816.25	133.519	-1	-1
Lowdose_2rad_IMAC_MSA1	13860	1	3	4.5264	708	0.523264	0.72337	4.86045	0	ASLGS*LEGEAEAEASS*PKGK	1478.53	44.4458	28.879	-1
Lowdose_2rad_IMAC_MSA1	3635	1	2	4.5263	373.9	0.356671	0.597219	5.72848	1.1e-05	RPAAAAAAGSAS*PR	1475.04	72.336	-1	-1
Lowdose_2rad_IMAC_MSA1	13230	1	2	4.5251	637.6	0.470045	0.685598	4.21352	0	SQS*TTFNPDDMSEPEFK	2608.6	27.0275	-1	-1
Lowdose_2rad_IMAC_MSA1	12611	1	3	4.5218	619.1	0.360852	0.60071	5.26766	9e-06	AAGGNS*REPS*PLPELALR	-1	-1	-1	-1
Lowdose_2rad_IMAC_MSA1	12292	1	3	4.5213	552.7	0.661646	0.813416	3.90977	0	EGMNPSYDEYADS*DEDQHDAYLER	1760.21	71.8145	-1	-1
Lowdose_2rad_IMAC_MSA1	6995	1	2	4.5212	553.8	0.410179	0.640452	4.95551	1e-06	TKDSGS*ISLQETR	1675.63	31.2397	-1	-1
Lowdose_2rad_IMAC_MSA1	5153	1	3	4.5212	541	0.527979	0.726622	4.04268	0	DSPSKSS*AEAQTPEDTPNKSGAEAK	1902.7	31.0284	-1	-1
Lowdose_2rad_IMAC_MSA1	7969	1	2	4.5202	773.7	0.36359	0.602984	5.80997	3e-06	NRS*AEEGELAESK	1160.12	191.012	-1	-1
Lowdose_2rad_IMAC_MSA1	5832	1	3	4.5194	771.2	0.433221	0.658195	6.61359	1e-06	SKGHYEVTGSDDET*GK	1382.2	35.3144	-1	-1
Lowdose_2rad_IMAC_MSA1	4683	1	2	4.5171	1542.1	0.526488	0.725595	5.17305	0	RGS*SSDEEGGPK	1885.65	46.4386	-1	-1
Lowdose_2rad_IMAC_MSA1	9237	1	3	4.5145	1135.5	0.38064	0.61696	4.43607	1e-06	TTRT*PEEGGYSYDISEK	1962.64	25.8184	-1	-1
Lowdose_2rad_IMAC_MSA1	7930	1	2	4.5144	878.5	0.334308	0.578194	4.90593	6e-06	S*RDSGDENEPIQER	1990.38	34.3141	-1	-1
Lowdose_2rad_IMAC_MSA1	12307	1	4	4.5141	467.5	0.580736	0.76206	5.26516	0	EGMNPSYDEYADS*DEDQHDAYLER	2249.57	25.139	-1	-1
Lowdose_2rad_IMAC_MSA1	10763	1	2	4.5129	92.3	0.426112	0.652773	-1.49241	1.6e-05	S*ASQS*SLDKLDQELKEQQK	506.051	0	0	-1
Lowdose_2rad_IMAC_MSA1	11279	1	2	4.5123	972	0.532943	0.730029	4.34754	0	TGS*YGALAEITASK	1838.34	0	-1	-1
Lowdose_2rad_IMAC_MSA1	9229	1	2	4.5073	609.9	0.447962	0.6693	5.00834	0	NSATFKS*FEDR	1472.45	48.2268	-1	-1
Lowdose_2rad_IMAC_MSA1	11336	1	2	4.5072	201.2	0.584487	0.764517	8.29942	0	KLEKEEEEGIS*QES*S*EEEQ	-1	-1	-1	-1
Lowdose_2rad_IMAC_MSA1	8652	1	2	4.5059	909.1	0.402872	0.634722	4.00435	1e-06	AQRLS*QETEALGR	1872.64	109.531	-1	-1
Lowdose_2rad_IMAC_MSA1	11285	1	2	4.505	1133.4	0.495938	0.704229	4.67936	0	TGS*YGALAEITASK	1814.74	0	-1	-1
Lowdose_2rad_IMAC_MSA1	8426	1	3	4.4958	366.1	0.370368	0.608579	5.29002	2.5e-05	TET*QEKNPLPSKETIEQEK	711.286	0	-1	-1
Lowdose_2rad_IMAC_MSA1	14992	1	3	4.4944	450.1	0.361939	0.601614	5.60844	2.5e-05	TGSSS*PPGGPPKPGSQLDSMLGSLQSDLNK	1166.97	27.0275	-1	-1
Lowdose_2rad_IMAC_MSA1	6169	1	3	4.4939	445.6	0.493914	0.70279	6.45962	1e-06	RRPS*DENTIAPSEVQK	1108.11	81.8517	-1	-1
Lowdose_2rad_IMAC_MSA1	7427	1	2	4.4906	434.6	0.541064	0.735571	4.86991	0	S*APAS*PTHPGLMSPR	1142.89	112.33	46.6551	-1
Lowdose_2rad_IMAC_MSA1	7318	1	2	4.4903	325.1	0.29419	0.542393	6.52783	8.4e-05	TRS*PS*PTLGESLAPHK	1267.04	33.5845	46.6551	-1
Lowdose_2rad_IMAC_MSA1	11615	1	2	4.4901	552	0.35291	0.594062	4.39716	8e-06	S*LDSDES*EDEEDDYQQKR	1819.96	0	87.4145	-1
Lowdose_2rad_IMAC_MSA1	14156	1	2	4.4889	345.6	0.383056	0.618915	2.17704	6e-06	SSLS*GDEEDELFKGATLK	1486.76	0	-1	-1
Lowdose_2rad_IMAC_MSA1	4688	1	2	4.4877	886.1	0.426811	0.653308	5.99299	0	RGSSS*DEEGGPK	2079.54	61.5699	-1	-1
Lowdose_2rad_IMAC_MSA1	9559	1	2	4.4869	545.7	0.489982	0.699987	3.43341	0	IHIDPEIQDGS*PTTSR	2259.65	85.6197	-1	-1
Lowdose_2rad_IMAC_MSA1	7726	1	3	4.4864	349.1	0.473587	0.688177	3.70257	2e-06	VNHEPEPAGGATPGATLPKS*PSQLR	1463.15	0	-1	-1
Lowdose_2rad_IMAC_MSA1	4014	1	2	4.4854	598.3	0.489276	0.699483	0.576898	0	SQSSDTEQQS*PTSGGGK	2450.42	116.712	-1	-1
Lowdose_2rad_IMAC_MSA1	12963	1	2	4.4822	201.6	0.262193	0.512048	3.04536	0.000397	SGSSS*PDSEITELKFPSINHD	1729.41	0	-1	-1
Lowdose_2rad_IMAC_MSA1	9630	1	3	4.4815	465.4	0.454513	0.674176	5.83248	1e-06	VADPDHDHTGFLTEY*VATR	1982.46	49.3131	-1	-1
Lowdose_2rad_IMAC_MSA1	9299	1	2	4.4803	1775.4	0.36386	0.603208	5.13817	1e-06	RGES*LDNLDSPR	1969.89	114.759	-1	-1
Lowdose_2rad_IMAC_MSA1	6853	1	4	4.4797	977.4	0.45887	0.677399	7.27265	0	IHRAS*DPGLPAEEPKEK	-1	-1	-1	-1
Lowdose_2rad_IMAC_MSA1	13745	1	2	4.4765	220.2	0.431833	0.65714	3.86125	4e-06	NAIS*LPQLNQAAYDSLVVGK	1329.59	120.239	-1	-1
Lowdose_2rad_IMAC_MSA1	5504	1	2	4.4678	217.6	0.391669	0.625835	5.20568	1.1e-05	S*GSGGGSAKEPQEER	1741.17	0	-1	-1
Lowdose_2rad_IMAC_MSA1	9946	1	2	4.4671	151.8	0.421884	0.649526	4.6816	8e-06	NKPGPNIES*GNEDDDASFK	1391.49	95.1351	-1	-1
Lowdose_2rad_IMAC_MSA1	12055	1	3	4.4665	413.5	0.318706	0.564541	5.19391	9.4e-05	SNS*APLIHGLSDTSPVFQAEAPSAR	1363.6	0	-1	-1
Lowdose_2rad_IMAC_MSA1	7203	1	2	4.4652	777.6	0.450237	0.670997	4.68478	0	SRLT*PVSPESSSTEEK	1853.42	25.6136	-1	-1
Lowdose_2rad_IMAC_MSA1	8343	1	2	4.4629	423.8	0.394519	0.628107	-1.91258	4e-06	VSEEQTQPPS*PAGAGMSTAMGR	2403.79	195.966	-1	-1
Lowdose_2rad_IMAC_MSA1	7411	1	2	4.4625	512.4	0.425412	0.652236	5.81651	1e-06	S*APAS*PTHPGLMSPR	1016.81	165.391	107.22	-1
Lowdose_2rad_IMAC_MSA1	10885	1	2	4.4585	350.1	0.465358	0.682172	8.76894	1e-06	LLKEGEEPTVYSDEEEPKDES*AR	1910.71	100.558	-1	-1
Lowdose_2rad_IMAC_MSA1	15174	1	3	4.4575	1113.9	0.478205	0.691524	4.94515	0	INRLS*TPIAGLDNINVFLK	2228.27	0	-1	-1
Lowdose_2rad_IMAC_MSA1	7824	1	2	4.4564	399.7	0.628534	0.792801	3.93761	0	S*SSVGSSSSYPISPAVSR	1491.41	0	-1	-1
Lowdose_2rad_IMAC_MSA1	8342	1	3	4.4557	191.7	0.379132	0.615737	-0.384437	9.4e-05	S*SPKEELHPAAPSQLAPSFSSSSSSSSGPR	957.946	0	-1	-1
Lowdose_2rad_IMAC_MSA1	6476	1	2	4.4542	340.5	0.335616	0.579324	5.39368	2.2e-05	ASSLSESS*PPKAMK	1491.46	27.0275	-1	-1
Lowdose_2rad_IMAC_MSA1	9886	1	3	4.4528	266.2	0.354698	0.595565	6.84466	9.4e-05	TGQAGS*LS*GSPKPFSPQLSAPITTK	1355.43	7.1174	16.8905	-1
Lowdose_2rad_IMAC_MSA1	5409	1	3	4.4527	229.5	0.322591	0.567971	7.13902	0.000331	DSPS*KSSAEAQTPEDTPNK	684.936	0	-1	-1
Lowdose_2rad_IMAC_MSA1	7344	1	2	4.4507	543.3	0.445166	0.667208	3.95892	1e-06	GYYS*PYSVSGSGSTAGSR	2124.86	117.124	-1	-1
Lowdose_2rad_IMAC_MSA1	7008	1	3	4.4499	721.8	0.385222	0.620663	4.5765	3e-06	KPSGLNGEASKS*QEMVHLVNK	1675.35	95.8731	-1	-1
Lowdose_2rad_IMAC_MSA1	11729	1	3	4.4484	295.1	0.41026	0.640515	4.156	1.7e-05	SLDS*DES*EDEEDDYQQKR	778.437	36.9365	133.025	-1
Lowdose_2rad_IMAC_MSA1	8429	1	3	4.4416	259.2	0.302796	0.550269	5.97948	0.000331	T*ETQEKNPLPSKETIEQEK	883.543	0	-1	-1
Lowdose_2rad_IMAC_MSA1	5960	1	3	4.4352	618.3	0.323593	0.568852	6.60203	2.5e-05	GKGGVTGS*PEASISGSK	740.08	44.4458	-1	-1
Lowdose_2rad_IMAC_MSA1	8566	1	2	4.4335	660.5	0.27017	0.519779	0.347902	6.1e-05	TDSREDEIS*PPPPNPVVK	1912.04	84.9563	-1	-1
Lowdose_2rad_IMAC_MSA1	10949	1	3	4.4311	200.5	0.334364	0.578242	1.2646	0.000331	RPASTAGLPT*AGLPTATGLPSGAPPGVATIR	784.893	0	-1	-1
Lowdose_2rad_IMAC_MSA1	14658	1	2	4.431	678.5	0.439607	0.663029	5.30014	1e-06	VDS*TTCLFPVEEK	1452.46	46.4386	-1	-1
Lowdose_2rad_IMAC_MSA1	13875	1	3	4.4292	590.9	0.40373	0.635398	4.7088	3e-06	PSTQPRPDS*WGEDNWEGLETDSR	2346.75	49.2693	-1	-1
Lowdose_2rad_IMAC_MSA1	11251	1	3	4.4287	441.7	0.370176	0.608421	5.46419	1.7e-05	KLSGDQIT*LPTTVDYSSVPK	1039.16	14.6689	-1	-1
Lowdose_2rad_IMAC_MSA1	6593	1	3	4.4247	269	0.368432	0.606986	2.43532	6.7e-05	TAS*FSESRADEVAPAKK	1010.6	75.9104	-1	-1
Lowdose_2rad_IMAC_MSA1	12791	1	2	4.424	786.3	0.296587	0.544598	3.78848	2.2e-05	SPFEIIS*PPAS*PPEMVGQR	1683.45	152.113	162.88	-1
Lowdose_2rad_IMAC_MSA1	7220	1	3	4.4234	543.5	0.339377	0.582561	4.72659	2.5e-05	KGDVEGSQS*QDEGEGSGESER	1162.14	26.8106	-1	-1
Lowdose_2rad_IMAC_MSA1	12952	1	2	4.4232	203.7	0.265916	0.51567	5.46966	0.000294	S*ASQSS*LDKLDQELK	1018.23	0	50.5889	-1
Lowdose_2rad_IMAC_MSA1	14329	1	2	4.4215	1338.6	0.377021	0.61402	4.28818	1e-06	TNS*MQQLEQWIK	2228.33	46.5836	-1	-1
Lowdose_2rad_IMAC_MSA1	13041	1	2	4.4198	67.3	0.326598	0.571488	2.70381	0.000294	RGS*GDTSSLIDPDTSLSELR	786.678	50.9006	-1	-1
Lowdose_2rad_IMAC_MSA1	11081	1	3	4.4194	381.9	0.503553	0.709615	4.27684	1e-06	ALVEFESNPEETREPGS*PPSVQR	1898.42	0	-1	-1
Lowdose_2rad_IMAC_MSA1	12628	1	2	4.4171	1088.7	0.46612	0.68273	4.17745	0	LPDS*DDDEDEETAIQR	2055.36	284.102	-1	-1
Lowdose_2rad_IMAC_MSA1	14168	1	3	4.4167	326.6	0.347499	0.58949	5.63357	6.7e-05	S*SKAS*LGSLEGEAEAEASSPK	598.217	0	27.039	-1
Lowdose_2rad_IMAC_MSA1	4545	1	2	4.4166	505.3	0.612485	0.782614	5.60859	0	SHS*PSASQSGSQLR	2249.18	50.7334	-1	-1
Lowdose_2rad_IMAC_MSA1	11795	1	2	4.4154	538.7	0.505481	0.710972	0.243488	0	SAMDSPVPASMFAPEPSS*PGAAR	2477.19	50.5889	-1	-1
Lowdose_2rad_IMAC_MSA1	12636	1	3	4.4127	243	0.432683	0.657786	5.81577	1.7e-05	AQS*YPDNHQEFSDYDNPIFEK	1439.27	0	-1	-1
Lowdose_2rad_IMAC_MSA1	8517	1	3	4.4113	118.8	0.373631	0.611254	6.08087	0.000331	LLKPGEEPSEYT*DEEDTKDHNKQD	1918.78	76.73	-1	-1
Lowdose_2rad_IMAC_MSA1	12000	1	2	4.4107	216	0.428571	0.654653	4.19249	6e-06	ASLGSLEGEAEAEASS*PKGK	2154.67	0	-1	-1
Lowdose_2rad_IMAC_MSA1	2962	1	2	4.407	100.8	0.449058	0.670118	3.52171	1.1e-05	GRASSHS*SQTQGGGSVTK	1671.17	0	-1	-1
Lowdose_2rad_IMAC_MSA1	6662	1	2	4.406	1282.5	0.479029	0.692119	5.87173	0	KGAGDGS*DEEVDGK	-1	-1	-1	-1
Lowdose_2rad_IMAC_MSA1	12049	1	2	4.4057	513.7	0.440725	0.663871	2.59248	1e-06	ANS*TSDSVFTETPSPVLK	1978.46	0	-1	-1
Lowdose_2rad_IMAC_MSA1	11349	1	2	4.4009	523.9	0.44191	0.664763	9.71588	1e-06	KLEKEEEEGISQES*S*EEEQ	1811.16	156.422	214.809	-1
Lowdose_2rad_IMAC_MSA1	12118	1	2	4.4007	823.8	0.516736	0.718844	5.327	0	ILS*DVTHSAVFGVPASK	1718.29	95.8731	-1	-1
Lowdose_2rad_IMAC_MSA1	6938	1	2	4.3999	747.7	0.458738	0.677302	5.3827	0	GGVTGS*PEASISGSK	1779.69	101.178	-1	-1
Lowdose_2rad_IMAC_MSA1	9520	1	2	4.3996	412.2	0.403173	0.634959	5.20341	3e-06	NSQEDS*EDS*EDKDVK	1693.29	68.6939	158.816	-1
Lowdose_2rad_IMAC_MSA1	14714	1	3	4.398	674.1	0.347794	0.589741	0.338386	1.2e-05	GGAGTGGTGS*PQASLEILAPEDSQVLQQATR	2008.83	0	-1	-1
Lowdose_2rad_IMAC_MSA1	7227	1	3	4.3961	540	0.50083	0.707693	4.35574	0	SLGNILQAKPTS*SPAKGPPQK	1404.18	23.9593	-1	-1
Lowdose_2rad_IMAC_MSA1	4517	1	2	4.3951	1141.7	0.273714	0.523177	5.05499	2.2e-05	KETQS*PEQVKSEK	1906.82	40.3036	-1	-1
Lowdose_2rad_IMAC_MSA1	6887	1	3	4.394	433.6	0.381702	0.61782	3.83295	1.2e-05	TKFAS*DDEHDEHDENGATGPVKR	1941.4	22.0918	-1	-1
Lowdose_2rad_IMAC_MSA1	10666	1	3	4.3931	449.5	0.237349	0.487185	5.37017	0.000605	VQSLEGEKLS*PKSDIS*PLT*PR	879.187	96.2096	36.9422	20.2117
Lowdose_2rad_IMAC_MSA1	15019	1	3	4.393	291.3	0.372092	0.609993	5.22739	4.8e-05	SSKAS*LGS*LEGEAEAEASSPK	897.982	8.1215	0	-1
Lowdose_2rad_IMAC_MSA1	14170	1	3	4.3914	424	0.454821	0.674404	0.984317	2e-06	SMPVDERDLQAALT*PGALTAAAAGTGTQGPR	971.549	0	-1	-1
Lowdose_2rad_IMAC_MSA1	7937	1	3	4.3892	718.3	0.508544	0.713123	6.07048	0	LSRGDS*LKEPTSIAESSR	1189.01	0	-1	-1
Lowdose_2rad_IMAC_MSA1	5090	1	2	4.3846	204.8	0.499065	0.706445	1.63942	1e-06	EGRGES*ENAGTNQETR	1812.41	84.9853	-1	-1
Lowdose_2rad_IMAC_MSA1	8645	1	2	4.3844	172.4	0.428907	0.65491	-0.459805	8e-06	ERSPS*PLRGNVVPS*PLPT*R	1551.84	47.8773	47.8773	47.8773
Lowdose_2rad_IMAC_MSA1	9921	1	4	4.3834	234.8	0.335607	0.579316	2.90175	2e-05	AHSSPASLQLGAVS*PGTLTPTGVVSGPAATPTAQHLR	1175.78	16.0685	-1	-1
Lowdose_2rad_IMAC_MSA1	8550	1	3	4.3832	391.9	0.45793	0.676705	5.40282	3e-06	S*RS*RDS*GDENEPIQER	-1	-1	-1	-1
Lowdose_2rad_IMAC_MSA1	8403	1	2	4.3825	679	0.425898	0.652609	3.70262	1e-06	RAS*ISEPSDTDPEPR	2202.44	112.877	-1	-1
Lowdose_2rad_IMAC_MSA1	10707	1	3	4.3811	608	0.347036	0.589098	4.42516	1.7e-05	KVVDYSQFQES*DDADEDYGR	2052.99	155.09	-1	-1
Lowdose_2rad_IMAC_MSA1	12345	1	2	4.3804	415	0.374532	0.61199	3.49892	8e-06	FFQGS*QEFLASASASAER	1375.38	138.099	-1	-1
Lowdose_2rad_IMAC_MSA1	8766	1	2	4.3793	467.9	0.434567	0.659217	-2.11693	1e-06	SQS*LPNSLDYTQTSDPGR	1459.53	28.879	-1	-1
Lowdose_2rad_IMAC_MSA1	9015	1	2	4.3791	788.7	0.452719	0.672844	5.90556	0	SALLTQNGTGS*LPR	1731.42	85.9037	-1	-1
Lowdose_2rad_IMAC_MSA1	8457	1	2	4.3788	773.4	0.452864	0.672952	5.33151	0	VQSLEGEKLS*PK	1768.77	216.893	-1	-1
Lowdose_2rad_IMAC_MSA1	5956	1	3	4.3784	551.7	0.390348	0.624778	7.16756	6e-06	GKGGVTGS*PEASISGSK	997.008	31.309	-1	-1
Lowdose_2rad_IMAC_MSA1	4039	1	2	4.3781	283.1	0.353258	0.594355	3.60542	2.2e-05	PGPTPSGT*NVGSSGRSPSK	1179.47	3.5781	-1	-1
Lowdose_2rad_IMAC_MSA1	11874	1	2	4.3741	577.3	0.373677	0.611291	4.71222	4e-06	ASVS*PMDEPVPDSES*PIEK	1389.3	0	42.5705	-1
Lowdose_2rad_IMAC_MSA1	9188	1	3	4.3717	391.3	0.353547	0.594598	5.61022	3.5e-05	KQSFDDNDS*EELEDKDSK	928.91	74.0459	-1	-1
Lowdose_2rad_IMAC_MSA1	13378	1	3	4.3715	517.2	0.422395	0.649919	4.74911	3e-06	KTSS*DDES*EEDEDDLLQR	1341.36	0	0	-1
Lowdose_2rad_IMAC_MSA1	8007	1	2	4.3706	389.7	0.282936	0.531917	5.95566	8.4e-05	KAEGEPQEES*PLK	-1	-1	-1	-1
Lowdose_2rad_IMAC_MSA1	6943	1	2	4.3704	1060.6	0.516818	0.718901	5.3827	0	GGVTGS*PEASISGSK	2486.94	95.4801	-1	-1
Lowdose_2rad_IMAC_MSA1	11577	1	2	4.3673	602.3	0.463009	0.680448	2.50424	0	RIDFIPVS*PAPS*PTR	1488.37	99.52	0	-1
Lowdose_2rad_IMAC_MSA1	9219	1	2	4.3644	281.5	0.363303	0.602746	-0.460487	1.6e-05	VPEASSEPFDTS*SPQAGR	1164.82	28.879	-1	-1
Lowdose_2rad_IMAC_MSA1	13903	1	2	4.3644	820.8	0.428925	0.654924	4.06529	1e-06	YVASYLLAALGGNSS*PSAK	2865.39	33.2193	-1	-1
Lowdose_2rad_IMAC_MSA1	10285	1	2	4.3635	335.9	0.404881	0.636303	3.27098	4e-06	SAS*TEKLEQGTSALIR	1236.91	28.879	-1	-1
Lowdose_2rad_IMAC_MSA1	11174	1	2	4.3632	628.9	0.444284	0.666546	1.5372	1e-06	KLEKEEEEGISQES*S*EEEQ	1477.16	156.422	82.6995	-1
Lowdose_2rad_IMAC_MSA1	10768	1	3	4.3626	238.6	0.276486	0.525819	5.79829	0.000812	RGLLYDS*DEEDEERPAR	807.361	28.2351	-1	-1
Lowdose_2rad_IMAC_MSA1	15232	1	3	4.3612	333.2	0.330161	0.574596	6.23459	9.4e-05	KET*ES*EAEDNLDDLEK	-1	-1	-1	-1
Lowdose_2rad_IMAC_MSA1	4400	1	4	4.3598	669.1	0.448461	0.669672	5.15887	0	RAHT*PTPGIYMGRPTHSGGGGGGGGGGGGGGGGR	1939.59	36.8721	-1	-1
Lowdose_2rad_IMAC_MSA1	10969	1	3	4.3566	722.5	0.398292	0.631104	1.62697	2e-06	LLKEGEEPTVYS*DEEEPKDESAR	1383.88	40.807	-1	-1
Lowdose_2rad_IMAC_MSA1	14280	1	2	4.3549	416.3	0.43629	0.660523	4.02284	1e-06	SSS*PAPADIAQTVQEDLR	3000.6	0	-1	-1
Lowdose_2rad_IMAC_MSA1	8053	1	2	4.353	223.2	0.343832	0.586372	4.65177	4.4e-05	ETERAS*PIKMDLAPSK	958.778	68.9518	-1	-1
Lowdose_2rad_IMAC_MSA1	12301	1	4	4.3527	442	0.4474	0.66888	5.02731	0	EGMNPSYDEYADS*DEDQHDAYLER	2225.42	0.9113	-1	-1
Lowdose_2rad_IMAC_MSA1	2940	1	3	4.3478	326.8	0.369451	0.607825	5.87134	3.5e-05	GRAS*SHSSQTQGGGSVTK	779.216	0	-1	-1
Lowdose_2rad_IMAC_MSA1	4995	1	3	4.3466	688.2	0.457392	0.676308	5.32322	1e-06	IDASKNEEDEGHSNS*SPR	1314.48	0	-1	-1
Lowdose_2rad_IMAC_MSA1	5654	1	3	4.3428	493.7	0.495441	0.703876	6.4641	0	SKS*NPDFLKK	741.557	31.2397	-1	-1
Lowdose_2rad_IMAC_MSA1	11035	1	2	4.3414	526.5	0.365159	0.604284	0.06582	6e-06	IEVLPVDTGAGGYSGNS*GSPK	2743.22	33.5845	-1	-1
Lowdose_2rad_IMAC_MSA1	13040	1	3	4.3382	666.9	0.334401	0.578274	5.58049	1.7e-05	RGSGDTS*SLIDPDTSLSELR	1864.88	0	-1	-1
Lowdose_2rad_IMAC_MSA1	11592	1	3	4.3333	467.3	0.494981	0.703549	5.51565	1e-06	QRPVPQPSSAS*LDEYTLMR	1214.38	32.1402	-1	-1
Lowdose_2rad_IMAC_MSA1	2900	1	2	4.3315	178.3	0.528408	0.726917	3.54436	1e-06	ASS*HSSQTQGGGSVTKK	1456.36	112.877	-1	-1
Lowdose_2rad_IMAC_MSA1	13068	1	3	4.3276	352.1	0.387536	0.622524	5.10518	2.5e-05	IFFDT*DDDDDMPHSTSR	2720.37	208.862	-1	-1
Lowdose_2rad_IMAC_MSA1	12091	1	2	4.3271	199.6	0.461602	0.679413	-3.11859	3e-06	S*NSAPLIHGLSDTSPVFQAEAPSAR	1692.65	0	-1	-1
Lowdose_2rad_IMAC_MSA1	9601	1	2	4.3239	354.9	0.446796	0.668428	4.57113	1e-06	GSEGYLAATYPTVGQTS*PR	1856.32	56.4386	-1	-1
Lowdose_2rad_IMAC_MSA1	14757	1	3	4.3225	590.3	0.420382	0.648369	2.40465	2e-06	LDQPVS*APPS*PRDISMEIDSPENMMR	1189.02	57.5542	31.3777	-1
Lowdose_2rad_IMAC_MSA1	6636	1	2	4.322	738.4	0.388177	0.623039	4.76458	2e-06	RGS*IGENQIKDEK	-1	-1	-1	-1
Lowdose_2rad_IMAC_MSA1	4370	1	3	4.3218	348.1	0.452936	0.673005	5.85472	4e-06	S*SSPGKPQAVSSLNSSHSR	2309.25	31.2397	-1	-1
Lowdose_2rad_IMAC_MSA1	13501	1	2	4.3215	375.5	0.453176	0.673183	3.97954	1e-06	QS*LGELIGTLNAAK	1506.53	300.859	-1	-1
Lowdose_2rad_IMAC_MSA1	5769	1	3	4.3185	644.2	0.533125	0.730154	6.12456	0	SEVQQPVHPKPLS*PDSR	1801.67	0	-1	-1
Lowdose_2rad_IMAC_MSA1	11403	1	2	4.3184	657.2	0.443845	0.666217	0.515454	1e-06	S*AGEEEDGPVLTDEQK	1475.45	208.756	-1	-1
Lowdose_2rad_IMAC_MSA1	11332	1	2	4.3078	460.3	0.404685	0.636149	8.86234	3e-06	SLSS*PTVTLSAPLEGAK	893.066	28.097	-1	-1
Lowdose_2rad_IMAC_MSA1	13758	1	2	4.3054	256.3	0.366656	0.605521	2.09585	2.2e-05	NAIS*LPQLNQAAYDSLVVGK	2090.07	228.822	-1	-1
Lowdose_2rad_IMAC_MSA1	15445	1	2	4.3034	1075.8	0.343054	0.585708	4.06813	4e-06	LDGLVET*PTGYIESLPR	1819.94	46.6551	-1	-1
Lowdose_2rad_IMAC_MSA1	10726	1	3	4.3005	465	0.340472	0.5835	5.02126	3.5e-05	IYGENGS*KSMSDVSAEDVQNLR	1440.09	0	-1	-1
Lowdose_2rad_IMAC_MSA1	11383	1	3	4.2997	537.3	0.45545	0.67487	4.44946	1e-06	KAEQGS*EEEGEGEEEEEEGGESK	1301.76	162.973	-1	-1
Lowdose_2rad_IMAC_MSA1	12634	1	2	4.2984	1073.8	0.482086	0.694324	5.48716	0	LPDS*DDDEDEETAIQR	2558.96	348.509	-1	-1
Lowdose_2rad_IMAC_MSA1	11558	1	2	4.2978	462.8	0.412932	0.642598	-3.63178	3e-06	ASVS*PMDEPVPDSESPIEK	2244.4	40.807	-1	-1
Lowdose_2rad_IMAC_MSA1	10222	1	2	4.2969	173.6	0.485373	0.696687	1.69208	2e-06	VSSPLSPLSPGIKS*PTIPR	1290.97	23.9593	-1	-1
Lowdose_2rad_IMAC_MSA1	10130	1	3	4.2926	156.4	0.295439	0.543543	3.21328	0.001441	EGDELEDNGKNFYES*DDDQKEK	375.168	43.5078	-1	-1
Lowdose_2rad_IMAC_MSA1	10680	1	2	4.2925	577.5	0.354945	0.595773	5.54376	8e-06	LIDLES*PTPESQK	1363.71	87.4145	-1	-1
Lowdose_2rad_IMAC_MSA1	5672	1	2	4.2909	544.2	0.373139	0.610851	5.43881	6e-06	RGS*IGENQGEEK	-1	-1	-1	-1
Lowdose_2rad_IMAC_MSA1	7956	1	2	4.2889	246.1	0.568794	0.754184	4.59748	0	S*SSVGSSSSYPISPAVSR	1926.58	0	-1	-1
Lowdose_2rad_IMAC_MSA1	4819	1	3	4.2889	845.5	0.367996	0.606627	6.37208	4e-06	KGPAAPPPT*PVKPPR	-1	-1	-1	-1
Lowdose_2rad_IMAC_MSA1	8536	1	2	4.2866	389.1	0.28953	0.53808	5.68234	8.4e-05	KGS*ITEYTAAEEK	1848.78	92.8771	-1	-1
Lowdose_2rad_IMAC_MSA1	15427	1	3	4.2865	1617	0.232847	0.482542	4.99536	4.8e-05	S*TPPPNNLVNPVQELETER	2225.53	0	-1	-1
Lowdose_2rad_IMAC_MSA1	6070	1	2	4.2834	466.8	0.367745	0.60642	5.0972	8e-06	FYYTAGSS*SPTHAK	1921.86	0	-1	-1
Lowdose_2rad_IMAC_MSA1	11215	1	2	4.2827	893.9	0.392042	0.626133	4.60652	1e-06	SMS*DVSAEDVQNLR	1446.06	25.4036	-1	-1
Lowdose_2rad_IMAC_MSA1	8060	1	2	4.2793	1029.8	0.467296	0.683591	5.11792	0	KRET*DDEGEDD	-1	-1	-1	-1
Lowdose_2rad_IMAC_MSA1	11561	1	2	4.2775	518.7	0.50457	0.710331	3.54455	0	ASVS*PMDEPVPDSESPIEK	1928.83	56.5109	-1	-1
Lowdose_2rad_IMAC_MSA1	12425	1	3	4.2766	1086.3	0.430646	0.656236	6.97716	0	LLESSLS*SSEGEEPVEYK	1960.85	0	-1	-1
Lowdose_2rad_IMAC_MSA1	6372	1	2	4.275	537.5	0.401988	0.634025	4.45517	3e-06	KAEGEPQEES*PLKSK	1746.72	48.2268	-1	-1
Lowdose_2rad_IMAC_MSA1	7001	1	4	4.2739	336.1	0.223098	0.472333	6.0206	0.000392	KPSGLNGEASKS*QEMVHLVNK	1451.53	42.5705	-1	-1
Lowdose_2rad_IMAC_MSA1	11833	1	3	4.2731	248.9	0.470548	0.685965	4.87572	6e-06	KLEKEEEEGIS*QES*S*EEEQ	-1	-1	-1	-1
Lowdose_2rad_IMAC_MSA1	9877	1	4	4.2643	537	0.471848	0.686912	5.44323	0	RDS*FDDRGPSLNPVLDYDHGSR	1823.81	0	-1	-1
Lowdose_2rad_IMAC_MSA1	3630	1	2	4.2635	301.7	0.239756	0.489649	4.91224	0.000397	RPAAAAAAGSAS*PR	1130.28	33.468	-1	-1
Lowdose_2rad_IMAC_MSA1	6256	1	4	4.2631	600.6	0.394009	0.627701	4.45428	0	SHS*SPASLQLGTGAGAAGSPAQQHAHLR	964.093	33.5845	-1	-1
Lowdose_2rad_IMAC_MSA1	15342	1	2	4.2611	269.3	0.401586	0.633708	4.08777	8e-06	ALES*PERPFLAILGGAK	-1	-1	-1	-1
Lowdose_2rad_IMAC_MSA1	13082	1	2	4.2606	1617.1	0.536755	0.732636	5.1638	0	TSFSVGS*DDELGPIR	2141.42	68.6939	-1	-1
Lowdose_2rad_IMAC_MSA1	12770	1	2	4.26	659.7	0.399906	0.632381	3.90134	2e-06	RLS*LPGLLSQVS*PR	986.01	97.3905	24.3731	-1
Lowdose_2rad_IMAC_MSA1	10026	1	2	4.2592	552.6	0.395215	0.628661	3.10515	3e-06	DSENLAS*PSEYPENGER	3100.68	110.209	-1	-1
Lowdose_2rad_IMAC_MSA1	7321	1	3	4.2585	598.4	0.35017	0.591752	6.27594	1.7e-05	TRS*PS*PTLGESLAPHK	1281.24	36.8721	12.8803	-1
Lowdose_2rad_IMAC_MSA1	12959	1	2	4.2584	193.2	0.298375	0.546237	4.09152	0.000158	SAS*QSS*LDKLDQELK	1323.64	56.5109	38.365	-1
Lowdose_2rad_IMAC_MSA1	5383	1	2	4.2565	277.2	0.426665	0.653196	3.34857	4e-06	TNPPTQKPPS*PPMSGR	1291.98	134.332	-1	-1
Lowdose_2rad_IMAC_MSA1	8563	1	3	4.2508	648.7	0.375153	0.612497	5.87382	6e-06	VPKPEPIPEPKEPS*PEK	-1	-1	-1	-1
Lowdose_2rad_IMAC_MSA1	8701	1	2	4.2502	522.9	0.370359	0.608571	3.90214	6e-06	TDSREDEIS*PPPPNPVVK	2008.41	32.2111	-1	-1
Lowdose_2rad_IMAC_MSA1	7570	1	2	4.2473	330.7	0.290349	0.53884	4.65315	0.000116	AFGPGLQGGSAGS*PAR	744.218	98.8881	-1	-1
Lowdose_2rad_IMAC_MSA1	3692	1	2	4.2465	448.2	0.540351	0.735086	5.3577	0	TGS*ESSQTGTSTTSSR	1710.54	0	-1	-1
Lowdose_2rad_IMAC_MSA1	10275	1	2	4.2462	260.2	0.336395	0.579996	3.1386	4.4e-05	S*ASTEKLEQGTSALIR	1340.74	36.73	-1	-1
Lowdose_2rad_IMAC_MSA1	6470	1	3	4.2432	398.8	0.452559	0.672725	1.41147	3e-06	HPGAHQGNLASGLHSNAIASPGS*PSLGR	624.106	0	-1	-1
Lowdose_2rad_IMAC_MSA1	7945	1	3	4.2422	433	0.43336	0.658301	5.45184	4e-06	LSRGDS*LKEPTSIAESSR	1229.6	27.4432	-1	-1
Lowdose_2rad_IMAC_MSA1	8911	1	2	4.2318	583.8	0.41786	0.646421	0.621577	1e-06	GAGDGS*DEEVDGKADGAEAKPAE	-1	-1	-1	-1
Lowdose_2rad_IMAC_MSA1	11870	1	2	4.2311	597.6	0.290397	0.538885	-1.45264	4.4e-05	ASVS*PMDEPVPDSES*PIEK	1797.34	0	52.255	-1
Lowdose_2rad_IMAC_MSA1	6369	1	3	4.2292	267.8	0.485222	0.696579	4.1647	4e-06	SPS*PPTQHTGQPPGQPSAPSQLSAPR	2056.48	0	-1	-1
Lowdose_2rad_IMAC_MSA1	11549	1	4	4.2289	358.7	0.367732	0.606409	7.13302	2e-06	GLKEGMNPSYDEYADS*DEDQHDAYLER	1796.5	49.3131	-1	-1
Lowdose_2rad_IMAC_MSA1	12876	1	2	4.2276	244.8	0.445264	0.667281	4.16995	3e-06	SLS*DFTGPPQLQALK	1153.45	0	-1	-1
Lowdose_2rad_IMAC_MSA1	13299	1	2	4.2276	625.7	0.48893	0.699235	5.04693	0	IMVGS*TDDPSVFSLPDSK	1918.88	33.2193	-1	-1
Lowdose_2rad_IMAC_MSA1	6378	1	3	4.2268	287.1	0.481854	0.694157	3.62052	3e-06	SPS*PPTQHTGQPPGQPSAPSQLSAPR	2584.32	16.7001	-1	-1
Lowdose_2rad_IMAC_MSA1	13294	1	2	4.2262	589.7	0.293999	0.542217	5.1651	4.4e-05	IMVGS*TDDPSVFSLPDSK	1653.62	34.7393	-1	-1
Lowdose_2rad_IMAC_MSA1	12077	1	2	4.226	340.1	0.528774	0.727168	0.258013	0	S*NSAPLIHGLSDTSPVFQAEAPSAR	1926.81	0	-1	-1
Lowdose_2rad_IMAC_MSA1	8900	1	2	4.2257	163.6	0.425113	0.652007	3.92325	1.1e-05	KTS*PASLDFPESQK	1729.08	66.4386	-1	-1
Lowdose_2rad_IMAC_MSA1	8186	1	2	4.2239	461.2	0.359147	0.599289	4.37023	1.1e-05	SSGHSSSELS*PDAVEK	1673.57	22.0262	-1	-1
Lowdose_2rad_IMAC_MSA1	11888	1	2	4.2207	552.1	0.239036	0.488913	5.73106	0.000216	DRPGS*PESPLLDAPFSR	1724.96	51.6504	-1	-1
Lowdose_2rad_IMAC_MSA1	9872	1	4	4.2199	370.9	0.460177	0.678363	6.17024	0	RDS*FDDRGPSLNPVLDYDHGSR	1811.6	33.0134	-1	-1
Lowdose_2rad_IMAC_MSA1	10082	1	3	4.2172	305.8	0.278194	0.527441	5.86199	0.000605	VQSLEGEKLS*PKSDISPLTPR	1016.68	50.2302	-1	-1
Lowdose_2rad_IMAC_MSA1	6466	1	4	4.2166	715.3	0.318693	0.564529	5.58123	2e-06	HPGAHQGNLASGLHSNAIASPGS*PSLGR	1279.03	24.3056	-1	-1
Lowdose_2rad_IMAC_MSA1	11455	1	4	4.2138	312.8	0.499407	0.706687	3.66075	0	AKTQT*PPVSPAPQPTEERLPSSPVYEDAASFK	1802.91	28.2351	-1	-1
Lowdose_2rad_IMAC_MSA1	13678	1	3	4.2134	825.8	0.284545	0.533428	4.40711	4.8e-05	YPLDVQKEFGY*DSPHDLDS*D	961.201	15.525	77.9441	-1
Lowdose_2rad_IMAC_MSA1	10379	1	2	4.2124	597.1	0.551704	0.742768	6.98134	0	AITSLLGGGS*PK	2029.38	104.749	-1	-1
Lowdose_2rad_IMAC_MSA1	7116	1	2	4.2112	219.7	0.363982	0.603309	2.6868	3.1e-05	LGAGGGS*PEKSPSAQELK	1365.28	142.463	-1	-1
Lowdose_2rad_IMAC_MSA1	9408	1	3	4.2108	872.3	0.337656	0.581082	7.46722	9e-06	RPS*QNAISFFNVGHSK	1746.05	138.037	-1	-1
Lowdose_2rad_IMAC_MSA1	11591	1	4	4.2105	167.8	0.415295	0.644434	5.4019	4e-06	KPPGTPPPS*ALPLGAPPPDALPPGPTPEDSPSLETGSR	967.812	8.9144	-1	-1
Lowdose_2rad_IMAC_MSA1	11846	1	4	4.2089	145.8	0.2159	0.46465	-0.177879	0.003594	AVS*PPHLDGPPS*PRS*PVIGSEVFLPNSNHVASGAGEAEER	817.894	3.0553	3.0553	3.0553
Lowdose_2rad_IMAC_MSA1	10135	1	2	4.2065	931	0.547011	0.739602	4.45772	0	NLALDEAGQRST*M	2523.09	50.5889	-1	-1
Lowdose_2rad_IMAC_MSA1	7735	1	2	4.2047	452.3	0.445906	0.667762	3.16356	1e-06	AQFSVAGVHTVPGS*PQAR	1635.91	48.7021	-1	-1
Lowdose_2rad_IMAC_MSA1	13820	1	2	4.2036	545.1	0.327196	0.57201	5.17061	2.2e-05	EDS*FESLDSLGSR	1058.18	43.5078	-1	-1
Lowdose_2rad_IMAC_MSA1	9918	1	4	4.1995	532.3	0.525991	0.725252	4.2029	0	HIKEEPLS*EEEPCTSTAIASPEKK	2694.28	95.1351	-1	-1
Lowdose_2rad_IMAC_MSA1	14255	1	2	4.1994	303.6	0.513169	0.716358	7.7249	0	GNSSS*PAPAASITSMLSPSFTPTSVIR	2106.67	0	-1	-1
Lowdose_2rad_IMAC_MSA1	14242	1	2	4.1989	329.7	0.598109	0.773375	-2.2812	0	GNSSS*PAPAASITSMLSPSFTPTSVIR	1632.72	0	-1	-1
Lowdose_2rad_IMAC_MSA1	6438	1	4	4.1967	467.8	0.42674	0.653253	4.64422	0	NYQQNY*QNSESGEKNEGSESAPEGQAQQR	2195.71	0	-1	-1
Lowdose_2rad_IMAC_MSA1	12571	1	3	4.1963	576.6	0.330053	0.574502	4.40202	3.5e-05	RVSVCAET*YNPDEEEEDTDPR	2280.74	0	-1	-1
Lowdose_2rad_IMAC_MSA1	7754	1	3	4.1957	215	0.414257	0.643628	4.42922	3.5e-05	TGKEYIPGQPPLSQSS*DSSPTR	1766.8	0	-1	-1
Lowdose_2rad_IMAC_MSA1	10877	1	2	4.1947	481.4	0.360073	0.600061	6.89059	1.1e-05	RSDS*LLSFR	1109.89	57.8182	-1	-1
Lowdose_2rad_IMAC_MSA1	11018	1	2	4.1947	954.6	0.405798	0.637023	7.03339	1e-06	TLS*SSAQEDIIR	1809.74	46.4386	-1	-1
Lowdose_2rad_IMAC_MSA1	11933	1	2	4.1944	790.7	0.506461	0.711661	-1.14286	0	IQEQES*S*GEEDSDLSPEER	2167.77	168.987	86.0447	-1
Lowdose_2rad_IMAC_MSA1	7301	1	3	4.1942	722.1	0.472963	0.687723	4.74822	0	TPSPKEEDEEPES*PPEKK	1625.33	205.554	-1	-1
Lowdose_2rad_IMAC_MSA1	13881	1	2	4.1932	474.9	0.49845	0.70601	4.14348	0	AS*LGSLEGEAEAEASS*PKGK	1648.99	21.7585	34.7393	-1
Lowdose_2rad_IMAC_MSA1	8160	1	3	4.1926	332.7	0.454062	0.673841	6.96372	4e-06	AAVLS*DS*EDEEKASAKK	726.728	59.7503	29.1418	-1
Lowdose_2rad_IMAC_MSA1	10933	1	2	4.1915	458.4	0.406609	0.637659	5.24847	3e-06	S*ASVNKEPVSLPGIMR	1562.67	0	-1	-1
Lowdose_2rad_IMAC_MSA1	14839	1	2	4.1876	178.4	0.386546	0.621728	4.5098	2.2e-05	QLS*PESLGTLQFGELNLGK	1315.83	87.4145	-1	-1
Lowdose_2rad_IMAC_MSA1	13277	1	3	4.1876	225.1	0.453052	0.673091	4.74809	1.2e-05	MVIQGPSS*PQGEAMVTDVLEDQKEGR	874.474	31.0284	-1	-1
Lowdose_2rad_IMAC_MSA1	8452	1	2	4.1873	786.4	0.375851	0.613067	6.60523	3e-06	VQSLEGEKLS*PK	1887.37	192.627	-1	-1
Lowdose_2rad_IMAC_MSA1	10511	1	3	4.1853	510.5	0.289298	0.537864	8.51614	0.000129	TFLDKDAQRLS*PIPEEVPK	1656.58	117.645	-1	-1
Lowdose_2rad_IMAC_MSA1	13558	1	3	4.1842	388.9	0.369007	0.607459	5.55635	2.5e-05	VVKPKS*PEPEATLTFPFLDK	1619.18	128.402	-1	-1
Lowdose_2rad_IMAC_MSA1	6513	1	2	4.1837	271.2	0.323924	0.569143	8.52287	6.1e-05	S*SSISEEKGDSDDEKPR	512.992	0	-1	-1
Lowdose_2rad_IMAC_MSA1	11516	1	2	4.1813	137.2	0.404061	0.635658	4.59574	2.2e-05	RAS*DTSLTQGIVAFR	1362.38	97.2212	-1	-1
Lowdose_2rad_IMAC_MSA1	12900	1	2	4.1805	1716.7	0.474632	0.688935	4.57144	0	S*LDSDES*EDEEDDYQQK	1515.05	0	48.7537	-1
Lowdose_2rad_IMAC_MSA1	9586	1	3	4.1792	263.4	0.283954	0.532873	0.740526	0.000605	VVDYSQFQES*DDADEDYGRDSGPPTKK	1206.25	30.7875	-1	-1
Lowdose_2rad_IMAC_MSA1	3944	1	2	4.1787	370.7	0.351569	0.592933	4.11639	1.6e-05	LGASNS*PGQPNSVKR	1242.49	142.126	-1	-1
Lowdose_2rad_IMAC_MSA1	5933	1	2	4.1785	262.4	0.4734	0.688041	5.87003	1e-06	SPGS*PVGEGTGSPPK	1788.73	57.8182	-1	-1
Lowdose_2rad_IMAC_MSA1	10652	1	3	4.1781	441.5	0.187549	0.433069	4.94723	0.003276	VQSLEGEKLS*PKSDIS*PLT*PR	1261.07	0	27.4432	50.5632
Lowdose_2rad_IMAC_MSA1	7402	1	3	4.1772	93.1	0.297472	0.54541	0.518588	0.004262	IS*QFLGICIQRSGRGLGAT*FILR	349.962	36.2416	51.4848	-1
Lowdose_2rad_IMAC_MSA1	5663	1	2	4.1755	671.6	0.340223	0.583286	5.1054	1.1e-05	RGS*IGENQGEEK	-1	-1	-1	-1
Lowdose_2rad_IMAC_MSA1	10927	1	2	4.1752	466.8	0.565817	0.752208	4.84131	0	S*ASVNKEPVSLPGIMR	1593.55	0	-1	-1
Lowdose_2rad_IMAC_MSA1	14707	1	3	4.1746	521	0.193144	0.439482	5.47212	0.001905	KET*ES*EAEDNLDDLEK	-1	-1	-1	-1
Lowdose_2rad_IMAC_MSA1	10212	1	2	4.1739	285.3	0.508996	0.71344	3.98107	1e-06	VSSPLSPLSPGIKS*PTIPR	1335.76	31.0284	-1	-1
Lowdose_2rad_IMAC_MSA1	12434	1	3	4.1736	484.2	0.261189	0.511067	4.91928	0.000331	S*SPKSNDSDLQEYELEVK	1392.99	0	-1	-1
Lowdose_2rad_IMAC_MSA1	7144	1	2	4.1663	142.2	0.536255	0.732294	10.0433	1e-06	FAS*DDEHDEHDENGATGPVKR	1045.24	243.215	-1	-1
Lowdose_2rad_IMAC_MSA1	14891	1	3	4.1655	638.4	0.429432	0.655311	5.8764	1e-06	SSKAS*LGS*LEGEAEAEASSPK	889.92	19.355	19.355	-1
Lowdose_2rad_IMAC_MSA1	8104	1	2	4.1643	449.3	0.446053	0.667872	5.05998	1e-06	TAS*GSSVTSLDGTR	1351.78	40.807	-1	-1
Lowdose_2rad_IMAC_MSA1	9569	1	3	4.1614	248.2	0.389148	0.623817	6.68253	4.8e-05	DRS*SPPPGYIPDELHQVAR	1813.28	0	-1	-1
Lowdose_2rad_IMAC_MSA1	11098	1	2	4.1613	928.4	0.480211	0.692973	3.96147	0	YNDWS*DDDDDSNESK	2362.73	87.4145	-1	-1
Lowdose_2rad_IMAC_MSA1	5567	1	2	4.1591	259.6	0.262821	0.512661	6.76231	0.000294	RSS*TSSEPTPTVK	824.433	34.7393	-1	-1
Lowdose_2rad_IMAC_MSA1	10587	1	3	4.1588	466	0.370299	0.608522	-1.96265	1.7e-05	TSS*DSALHTSVMNPSPQDTYPGPTPPSILPSR	2369.21	27.3069	-1	-1
Lowdose_2rad_IMAC_MSA1	6341	1	2	4.1575	443.6	0.387252	0.622296	6.31515	6e-06	LRLS*PS*PTSQR	1667.16	141.785	46.6551	-1
Lowdose_2rad_IMAC_MSA1	13089	1	2	4.1569	1455.3	0.41389	0.643343	4.5227	0	TSFSVGS*DDELGPIR	2140.64	48.036	-1	-1
Lowdose_2rad_IMAC_MSA1	9686	1	3	4.1568	400.1	0.254354	0.504335	6.364	0.000605	S*TRSVENLPECGITHEQR	1343.51	0	-1	-1
Lowdose_2rad_IMAC_MSA1	12923	1	3	4.156	236.7	0.388691	0.623451	5.0408	6.7e-05	ELS*NSPLRENSFGSPLEFR	1606.59	0	-1	-1
Lowdose_2rad_IMAC_MSA1	9029	1	2	4.1557	430.8	0.36083	0.600691	0.713937	1.1e-05	HVILSGS*TEVISNEGGR	1866.1	28.879	-1	-1
Lowdose_2rad_IMAC_MSA1	12637	1	3	4.1554	334.5	0.215166	0.46386	6.33472	0.002505	RAS*VCAEAYNPDEEEDDAESR	1308.65	27.0853	-1	-1
Lowdose_2rad_IMAC_MSA1	9513	1	2	4.154	462.2	0.404068	0.635663	3.98143	4e-06	NSQEDS*EDS*EDKDVK	1184.93	61.74	119.376	-1
Lowdose_2rad_IMAC_MSA1	7929	1	2	4.1515	114.4	0.346092	0.588296	4.98677	0.000116	HTGPNS*PDTANDGFVR	1152.3	55.3598	-1	-1
Lowdose_2rad_IMAC_MSA1	10957	1	2	4.1501	367.9	0.265488	0.515255	5.43638	0.000216	DIIRQPS*EEEIIK	-1	-1	-1	-1
Lowdose_2rad_IMAC_MSA1	6874	1	4	4.15	329.6	0.518337	0.719956	6.88329	0	TKFAS*DDEHDEHDENGATGPVKR	1705.1	46.4114	-1	-1
Lowdose_2rad_IMAC_MSA1	10378	1	2	4.1482	1308.9	0.432694	0.657795	4.98237	0	VPS*S*DEEVVEEPQSR	2454.6	107.483	111.511	-1
Lowdose_2rad_IMAC_MSA1	12420	1	3	4.1471	951.5	0.303803	0.551183	5.7848	1.7e-05	LLES*SLSSSEGEEPVEYK	2032.21	56.5109	-1	-1
Lowdose_2rad_IMAC_MSA1	5675	1	2	4.1464	521.8	0.446773	0.668411	5.88855	1e-06	SGAQASSTPLS*PTR	1811.1	25.4036	-1	-1
Lowdose_2rad_IMAC_MSA1	13376	1	3	4.1455	908.3	0.460934	0.678921	5.63466	0	GGREGFES*DTDSEFTFK	1299.15	119.755	-1	-1
Lowdose_2rad_IMAC_MSA1	8191	1	2	4.1453	1133.4	0.389501	0.6241	5.77098	1e-06	KRET*DDEGEDD	-1	-1	-1	-1
Lowdose_2rad_IMAC_MSA1	11346	1	2	4.1448	639.5	0.380235	0.616632	3.63309	4e-06	RSS*GFISELPSEEGK	1913.11	66.4386	-1	-1
Lowdose_2rad_IMAC_MSA1	4373	1	3	4.1447	543.4	0.462156	0.679821	5.3963	1e-06	S*SSPGKPQAVSSLNSSHSR	1789.22	18.1803	-1	-1
Lowdose_2rad_IMAC_MSA1	5700	1	2	4.1446	578.5	0.349925	0.591545	2.57669	1.1e-05	NDKS*EEEQSSSSVK	1635.12	321.986	-1	-1
Lowdose_2rad_IMAC_MSA1	11359	1	2	4.144	926.3	0.45999	0.678226	5.23766	0	SQS*FAGFSGLQER	2034.59	46.5836	-1	-1
Lowdose_2rad_IMAC_MSA1	10307	1	2	4.1438	470.8	0.339495	0.582662	6.07685	1.6e-05	RFS*DGAASIQAFK	1179.42	89.448	-1	-1
Lowdose_2rad_IMAC_MSA1	12228	1	2	4.1436	697.9	0.405396	0.636707	4.75211	2e-06	GSGTAS*DDEFENLR	1806.43	92.8771	-1	-1
Lowdose_2rad_IMAC_MSA1	10919	1	2	4.1432	624.5	0.410552	0.640743	7.79241	2e-06	KLEKEEEEGISQES*S*EEEQ	2156.41	156.422	175.159	-1
Lowdose_2rad_IMAC_MSA1	7367	1	2	4.1412	189.1	0.279001	0.528205	2.88289	0.000294	SSSVGSSSSYPIS*PAVSR	1836.25	74.5809	-1	-1
Lowdose_2rad_IMAC_MSA1	11409	1	3	4.1408	245.8	0.528111	0.726712	4.03482	1e-06	SKS*PPKVPIVIQDDSLPAGPPPQIR	1655.91	27.3069	-1	-1
Lowdose_2rad_IMAC_MSA1	11393	1	3	4.1398	96.4	0.413353	0.642925	3.26704	0.000243	KLEKEEEEGIS*QES*S*EEEQ	-1	-1	-1	-1
Lowdose_2rad_IMAC_MSA1	13883	1	2	4.1378	1204.5	0.350573	0.592092	6.04687	3e-06	S*TAALEEDAQILK	1783.72	36.4386	-1	-1
Lowdose_2rad_IMAC_MSA1	12249	1	3	4.1376	1268.8	0.533401	0.730343	2.52036	0	IS*APNVDFNLEGPK	-1	-1	-1	-1
Lowdose_2rad_IMAC_MSA1	14273	1	2	4.1357	483.6	0.457577	0.676444	2.44933	1e-06	S*SSPAPADIAQTVQEDLR	2541.41	0	-1	-1
Lowdose_2rad_IMAC_MSA1	5166	1	2	4.1346	619.8	0.433657	0.658526	5.27272	1e-06	PFSAPKPQTS*PSPK	2368.84	66.4386	-1	-1
Lowdose_2rad_IMAC_MSA1	10996	1	4	4.1333	137.9	0.477778	0.691215	5.0255	1e-06	AKTQTPPVSPAPQPTEERLPS*SPVYEDAASFK	995.335	0	-1	-1
Lowdose_2rad_IMAC_MSA1	12771	1	2	4.1327	241.6	0.436494	0.660677	3.22384	4e-06	SYS*SPDITQAIQEEEKR	1893.21	0	-1	-1
Lowdose_2rad_IMAC_MSA1	13425	1	3	4.1327	362	0.425799	0.652533	4.11312	9e-06	HGSGADSDY*ENTQSGDPLLGLEGK	838.007	0	-1	-1
Lowdose_2rad_IMAC_MSA1	13759	1	3	4.1307	310.3	0.374924	0.61231	7.42134	4.8e-05	KCS*LPAEEDSVLEK	1185.7	164.341	-1	-1
Lowdose_2rad_IMAC_MSA1	14705	1	3	4.1305	1102.4	0.176419	0.420023	7.86759	0.000812	TSS*EDNLYLAVLR	2873.26	46.5836	-1	-1
Lowdose_2rad_IMAC_MSA1	10702	1	2	4.1302	609.9	0.450487	0.671183	5.22168	1e-06	LKDLFDYS*PPLHK	1429.36	76.73	-1	-1
Lowdose_2rad_IMAC_MSA1	10884	1	2	4.1299	729.2	0.392891	0.62681	7.81607	3e-06	RSDS*LLSFR	1444.03	50.9006	-1	-1
Lowdose_2rad_IMAC_MSA1	11206	1	3	4.1286	256.8	0.48428	0.695902	5.22344	4e-06	KLEKEEEEGIS*QES*S*EEEQ	-1	-1	-1	-1
Lowdose_2rad_IMAC_MSA1	6182	1	3	4.1281	575.7	0.389429	0.624042	5.52735	6e-06	RRPS*DENTIAPSEVQK	1369.76	55.795	-1	-1
Lowdose_2rad_IMAC_MSA1	11023	1	3	4.1279	457.7	0.306815	0.553909	3.61439	9.4e-05	KLEKEEEEGISQES*S*EEEQ	1370.4	12.2767	12.2767	-1
Lowdose_2rad_IMAC_MSA1	14947	1	3	4.1276	515.4	0.259545	0.509456	3.56098	0.000331	EFSGPSTPTGT*LEFEGGEVSLEGGK	1343.28	56.7945	-1	-1
Lowdose_2rad_IMAC_MSA1	9933	1	3	4.1257	373.4	0.350777	0.592264	5.71438	4.8e-05	NKPGPNIES*GNEDDDASFK	1250.17	72.843	-1	-1
Lowdose_2rad_IMAC_MSA1	14529	1	3	4.1253	517.1	0.473663	0.688232	4.66226	1e-06	S*SKAS*LGSLEGEAEAEASSPK	932.885	0	18.562	-1
Lowdose_2rad_IMAC_MSA1	4372	1	2	4.1237	423.8	0.450348	0.67108	4.32938	1e-06	SYS*PDGKESPSDKK	1876.61	33.2193	-1	-1
Lowdose_2rad_IMAC_MSA1	12631	1	2	4.1236	835.5	0.430134	0.655846	2.16565	1e-06	S*LDSDES*EDEEDDYQQK	1647.82	0	119.755	-1
Lowdose_2rad_IMAC_MSA1	5235	1	3	4.1226	553.1	0.37634	0.613466	5.90074	9e-06	SGPKPFSAPKPQT*SPSPK	1084.47	0	-1	-1
Lowdose_2rad_IMAC_MSA1	11355	1	2	4.1217	1052	0.479098	0.692169	5.39538	0	SQS*FAGFSGLQER	1906.6	56.5109	-1	-1
Lowdose_2rad_IMAC_MSA1	9400	1	2	4.1213	715	0.322568	0.567951	5.55957	1.6e-05	LGS*SSNLQFK	2152.8	56.4386	-1	-1
Lowdose_2rad_IMAC_MSA1	8139	1	4	4.1184	213.4	0.411058	0.641138	-8.72822	2e-06	EGPMIHSGSVIAAGIS*QGRS*T*SLK	84.9938	16.2399	16.2399	0
Lowdose_2rad_IMAC_MSA1	11589	1	3	4.1183	618.2	0.504723	0.710439	5.48114	0	AKS*PTPESSTIASYVTLR	1256.5	15.3994	-1	-1
Lowdose_2rad_IMAC_MSA1	9005	1	2	4.1181	136.5	0.332143	0.576318	1.52015	0.000158	LSLEGDHST*PPSAYGSVK	1865.41	31.0284	-1	-1
Lowdose_2rad_IMAC_MSA1	6064	1	2	4.1154	438.5	0.422681	0.650139	4.94819	3e-06	FYYTAGSS*SPTHAK	1781.69	0	-1	-1
Lowdose_2rad_IMAC_MSA1	3310	1	3	4.1145	290.3	0.459205	0.677647	6.75346	6e-06	ARS*RT*PPSAPSQSR	811.135	126.52	126.52	-1
Lowdose_2rad_IMAC_MSA1	13854	1	3	4.1111	492.9	0.299847	0.547583	4.43679	9.4e-05	ASLGS*LEGEAEAEASS*PKGK	929.061	88.0884	28.879	-1
Lowdose_2rad_IMAC_MSA1	10076	1	2	4.1106	358	0.447818	0.669192	2.10643	2e-06	KAEDS*DS*EPEPEDNVR	-1	-1	-1	-1
Lowdose_2rad_IMAC_MSA1	13078	1	3	4.1099	140.3	0.533273	0.730255	-1.47335	6e-06	GIPLATGDTS*PEPELLPGAPLPPPKEVINGNIK	829.515	23.9593	-1	-1
Lowdose_2rad_IMAC_MSA1	13497	1	2	4.1075	348.9	0.386318	0.621545	3.09301	8e-06	QS*LGELIGTLNAAK	1559.23	121.715	-1	-1
Lowdose_2rad_IMAC_MSA1	10759	1	3	4.1074	619.9	0.494011	0.702859	6.34862	0	LKDLFDYS*PPLHK	900.985	92.8771	-1	-1
Lowdose_2rad_IMAC_MSA1	8493	1	2	4.1073	113	0.288779	0.537382	5.23598	0.000534	SGKNSQEDS*EDS*EDKDVK	2064.69	74.5809	93.4564	-1
Lowdose_2rad_IMAC_MSA1	9414	1	3	4.1061	283.4	0.423638	0.650875	7.07952	1.7e-05	RPS*QNAISFFNVGHSK	774.262	122.478	-1	-1
Lowdose_2rad_IMAC_MSA1	9555	1	3	4.1046	210.9	0.338425	0.581743	4.8305	0.000243	MAPTPIPT*RSPSDSSTASTPVAEQIER	1631.66	0	-1	-1
Lowdose_2rad_IMAC_MSA1	13155	1	3	4.1008	601.2	0.415553	0.644634	3.86041	3e-06	RTS*SEDNLYLAVLR	1614.72	0	-1	-1
Lowdose_2rad_IMAC_MSA1	15039	1	3	4.0997	333.4	0.264263	0.514065	4.33997	0.000605	SSKAS*LGS*LEGEAEAEASSPK	1360.12	0	8.9779	-1
Lowdose_2rad_IMAC_MSA1	6848	1	4	4.0968	576.3	0.364504	0.603742	7.99399	1e-06	IHRAS*DPGLPAEEPKEK	-1	-1	-1	-1
Lowdose_2rad_IMAC_MSA1	5438	1	2	4.0926	209	0.197796	0.444743	3.70162	0.002853	ILEQQNS*SRTLEKNK	647.673	15.0222	-1	-1
Lowdose_2rad_IMAC_MSA1	8624	1	2	4.0916	841.5	0.43208	0.657328	4.48653	1e-06	NTSAEKELSS*PIS*PK	1727.83	72.8771	54.5597	-1
Lowdose_2rad_IMAC_MSA1	10277	1	3	4.0905	480.3	0.301601	0.549182	4.66101	9.4e-05	SAS*TEKLEQGTSALIR	824.763	33.5845	-1	-1
Lowdose_2rad_IMAC_MSA1	6227	1	2	4.0896	174.6	0.3761	0.61327	4.57752	3.1e-05	GS*SQPNLSTSHSEQEYGK	1767.37	0	-1	-1
Lowdose_2rad_IMAC_MSA1	10975	1	3	4.0888	466.8	0.441743	0.664637	3.92285	3e-06	LLKEGEEPTVY*SDEEEPKDESAR	1248.06	0	-1	-1
Lowdose_2rad_IMAC_MSA1	11976	1	3	4.0878	285.4	0.280567	0.529686	4.14748	0.000605	SEPVKEESSELEQPFAQDTS*SVGPDR	1073.36	0	-1	-1
Lowdose_2rad_IMAC_MSA1	10870	1	2	4.0853	429.4	0.358578	0.598814	9.10687	1.6e-05	LLKEGEEPTVYS*DEEEPKDESAR	1948.67	118.801	-1	-1
Lowdose_2rad_IMAC_MSA1	12045	1	2	4.0833	515.7	0.446869	0.668483	1.98307	1e-06	ANS*TSDSVFTETPSPVLK	1548.39	40.5889	-1	-1
Lowdose_2rad_IMAC_MSA1	9857	1	3	4.0832	367.9	0.542736	0.736706	3.35329	0	DKS*PVREPIDNLTPEER	1810.12	256.863	-1	-1
Lowdose_2rad_IMAC_MSA1	8332	1	3	4.0819	329.2	0.581567	0.762605	6.38658	0	NTSAEKELSSPIS*PK	845.542	26.6493	-1	-1
Lowdose_2rad_IMAC_MSA1	6236	1	2	4.0791	879.3	0.520679	0.721581	4.50762	0	GDEASEEGQNGSS*PK	2940.63	34.7393	-1	-1
Lowdose_2rad_IMAC_MSA1	8549	1	2	4.077	479.7	0.339637	0.582784	2.86679	2.2e-05	AMADELS*EKQVYDAHTK	1893.56	127.311	-1	-1
Lowdose_2rad_IMAC_MSA1	6229	1	2	4.0761	769.6	0.537057	0.732842	5.03148	0	GDEASEEGQNGSS*PK	2735.09	50.5889	-1	-1
Lowdose_2rad_IMAC_MSA1	3134	1	3	4.0747	580	0.231624	0.481273	6.26345	0.000605	RPATADS*PKPSAK	716.855	19.1637	-1	-1
Lowdose_2rad_IMAC_MSA1	7295	1	2	4.0738	440.6	0.360376	0.600313	3.93034	1.1e-05	SPADPTDLGGQTS*PR	2381.39	34.7393	-1	-1
Lowdose_2rad_IMAC_MSA1	11010	1	3	4.0738	173.6	0.327753	0.572497	6.23504	0.000605	GNAEGS*S*DEEGKLVIDEPAKEK	-1	-1	-1	-1
Lowdose_2rad_IMAC_MSA1	11742	1	2	4.0736	313.8	0.424612	0.651623	4.64743	4e-06	ETSFGS*SENITMTSLSK	1539.13	69.4786	-1	-1
Lowdose_2rad_IMAC_MSA1	12751	1	4	4.0709	358.4	0.191211	0.437277	2.9396	0.001455	RVS*GEPQQSGDGSLSPQAEAIEVAAGESAGR	575.38	4.2311	-1	-1
Lowdose_2rad_IMAC_MSA1	13773	1	3	4.0701	353.5	0.258077	0.508013	6.79085	0.000812	KMPLDLS*PLATPIIR	739.62	75.8828	-1	-1
Lowdose_2rad_IMAC_MSA1	8009	1	3	4.0691	421.7	0.357106	0.597583	5.322	3.5e-05	TKFAS*DDEHDEHDENGATGPVK	1672.06	22.0918	-1	-1
Lowdose_2rad_IMAC_MSA1	8151	1	3	4.0689	425	0.365111	0.604244	5.48772	2.5e-05	TEMDKSPFNS*PS*PQDSPR	1470.09	51.5088	62.4965	-1
Lowdose_2rad_IMAC_MSA1	12814	1	3	4.0688	489.3	0.426096	0.65276	4.4749	4e-06	TESPAT*AAETASEELDNR	1785.39	31.2954	-1	-1
Lowdose_2rad_IMAC_MSA1	13898	1	3	4.0667	384.1	0.242285	0.492225	4.81893	0.000812	QMNMS*PPPGNAGPVIMSIEEK	1450.3	175.852	-1	-1
Lowdose_2rad_IMAC_MSA1	9190	1	2	4.0657	456.6	0.380697	0.617006	5.21134	8e-06	IEDVGS*DEEDDSGKDK	2344.39	166.615	-1	-1
Lowdose_2rad_IMAC_MSA1	11396	1	3	4.0648	770.8	0.416576	0.645427	3.36178	1e-06	SKYDEIFYNLAPADGKLS*GSK	966.109	15.3994	-1	-1
Lowdose_2rad_IMAC_MSA1	10733	1	2	4.061	1689.3	0.522925	0.723136	5.13583	0	RVS*LSEIGFGK	1763.55	75.9104	-1	-1
Lowdose_2rad_IMAC_MSA1	14302	1	2	4.0609	808.3	0.50772	0.712545	3.22263	0	EQDVVTGVS*PLLFR	2290.73	53.7264	-1	-1
Lowdose_2rad_IMAC_MSA1	6629	1	2	4.0606	577.4	0.438433	0.662143	5.36714	1e-06	RGS*IGENQIKDEK	-1	-1	-1	-1
Lowdose_2rad_IMAC_MSA1	10961	1	3	4.0606	256.1	0.447126	0.668675	4.58479	1.2e-05	DMES*PTKLDVTLAK	1138.85	0	-1	-1
Lowdose_2rad_IMAC_MSA1	7036	1	2	4.0602	532	0.360844	0.600703	6.69041	8e-06	NKAGT*PVSELTK	1662.63	107.814	-1	-1
Lowdose_2rad_IMAC_MSA1	9236	1	2	4.0591	499.1	0.530364	0.728261	4.74844	0	NSATFKS*FEDR	2064.99	51.3432	-1	-1
Lowdose_2rad_IMAC_MSA1	10809	1	2	4.0568	709.7	0.319981	0.565669	5.7375	1.6e-05	GFSVVADT*PELQR	1663.14	61.362	-1	-1
Lowdose_2rad_IMAC_MSA1	14021	1	2	4.0554	2284.5	0.469473	0.685181	6.01123	0	NVFTS*AEELER	1774.8	56.5109	-1	-1
Lowdose_2rad_IMAC_MSA1	10568	1	3	4.0554	260	0.35454	0.595433	6.68942	0.000129	S*RSLPAFPTSSLLTQSQK	1013.03	0	-1	-1
Lowdose_2rad_IMAC_MSA1	12295	1	3	4.0526	495.2	0.258896	0.508818	4.75883	0.000331	TEVALAKDMESPTKLDVT*LAK	955.983	15.6488	-1	-1
Lowdose_2rad_IMAC_MSA1	7993	1	2	4.0519	418.7	0.285323	0.534156	3.95788	0.000116	KAEGEPQEES*PLK	-1	-1	-1	-1
Lowdose_2rad_IMAC_MSA1	6199	1	2	4.0498	143.9	0.277594	0.526872	-0.170078	0.000534	GS*SQPNLSTSHSEQEYGK	2075.08	0	-1	-1
Lowdose_2rad_IMAC_MSA1	9576	1	2	4.049	643.7	0.499432	0.706705	4.87495	0	GIS*QTNLITTVTPEKK	1463.03	132.877	-1	-1
Lowdose_2rad_IMAC_MSA1	8255	1	2	4.0486	766.3	0.440671	0.663831	5.80814	1e-06	RDS*WSYINSK	1907.93	132.095	-1	-1
Lowdose_2rad_IMAC_MSA1	13411	1	4	4.0461	341.6	0.384617	0.620175	1.31809	2e-06	EASSPPPHPQLHS*EEEIEPMEGPAPPVLIQLS*PPNTDADTR	1991.41	0.7286	36.9422	-1
Lowdose_2rad_IMAC_MSA1	8516	1	2	4.0456	274.3	0.36494	0.604103	4.64886	2.2e-05	GGVTGS*PEAS*ISGSKGDLK	2039.53	40.807	36.8721	-1
Lowdose_2rad_IMAC_MSA1	9253	1	2	4.0456	783.1	0.527932	0.726589	1.66138	0	TSASEGNPYVSSTLSVPAS*PR	2760.07	92.6724	-1	-1
Lowdose_2rad_IMAC_MSA1	14323	1	2	4.0456	987.2	0.315528	0.561719	6.78548	1.1e-05	TNS*MQQLEQWIK	2037.21	33.5845	-1	-1
Lowdose_2rad_IMAC_MSA1	12615	1	3	4.0455	805.2	0.202571	0.450079	5.80768	0.000605	AAGGNS*REPS*PLPELALR	-1	-1	-1	-1
Lowdose_2rad_IMAC_MSA1	5552	1	3	4.0452	1028.7	0.40485	0.636278	6.2151	1e-06	YDERPGPS*PLPHR	1840.75	186.874	-1	-1
Lowdose_2rad_IMAC_MSA1	10069	1	2	4.0435	265.8	0.455274	0.67474	1.62876	3e-06	SVAAEGALLPQTPPS*PR	1261.29	99.9471	-1	-1
Lowdose_2rad_IMAC_MSA1	9538	1	2	4.04	355.1	0.319381	0.565138	4.83066	6.1e-05	TMLLLSRS*PEAQPK	1149.83	56.503	-1	-1
Lowdose_2rad_IMAC_MSA1	11595	1	3	4.039	811.5	0.437782	0.661651	5.11904	1e-06	AKS*PTPESSTIASYVTLR	1241.57	0	-1	-1
Lowdose_2rad_IMAC_MSA1	12557	1	4	4.0363	273.6	0.348091	0.589992	4.15089	1.3e-05	SSHYGGS*LPNVNQIGSGLAEFQSPLHSPLDSSR	736.798	0	-1	-1
Lowdose_2rad_IMAC_MSA1	4650	1	2	4.0355	287.3	0.320803	0.566395	3.67135	6.1e-05	GAKEEHGGLIRS*PR	-1	-1	-1	-1
Lowdose_2rad_IMAC_MSA1	9710	1	3	4.0352	481.2	0.293691	0.541933	5.09509	0.000129	EEDEPEERS*GDETPGSEVPGDK	757.811	136.125	-1	-1
Lowdose_2rad_IMAC_MSA1	11255	1	3	4.0344	429	0.456177	0.675409	5.78561	2e-06	KLSGDQIT*LPTTVDYSSVPK	1145.95	23.2721	-1	-1
Lowdose_2rad_IMAC_MSA1	9932	1	4	4.0339	545.7	0.477825	0.691249	4.91892	0	AHSSPAS*LQLGAVSPGTLTPTGVVSGPAATPTAQHLR	1259.77	0	-1	-1
Lowdose_2rad_IMAC_MSA1	9177	1	4	4.0323	813	0.379014	0.615641	6.32043	0	SPEKIEEVLSPEGSPS*KSPSK	2226.02	0	-1	-1
Lowdose_2rad_IMAC_MSA1	4524	1	2	4.032	393.4	0.287897	0.53656	6.36414	0.000116	TVART*PLGQR	1474.72	52.604	-1	-1
Lowdose_2rad_IMAC_MSA1	11688	1	3	4.0303	226.7	0.295561	0.543655	4.38834	0.000605	DFQDYMEPEEGCQGS*PQRR	963.958	71.2483	-1	-1
Lowdose_2rad_IMAC_MSA1	13502	1	3	4.0299	171.4	0.358967	0.599139	4.62405	0.000243	RRGS*SGSVDETLFALPAASEPVIR	1583.63	0	-1	-1
Lowdose_2rad_IMAC_MSA1	6442	1	3	4.0291	249.9	0.361421	0.601183	7.9696	9.4e-05	KQKGS*EENLDEAR	-1	-1	-1	-1
Lowdose_2rad_IMAC_MSA1	8424	1	2	4.0283	337.4	0.306556	0.553675	4.87611	8.4e-05	RGS*LSNAGDPEIVK	580.97	65.9172	-1	-1
Lowdose_2rad_IMAC_MSA1	7917	1	2	4.0273	494	0.266183	0.515929	3.66384	0.000158	SRPTSEGS*DIESTEPQK	1242.12	0	-1	-1
Lowdose_2rad_IMAC_MSA1	11129	1	3	4.0258	897.3	0.473794	0.688327	6.27018	0	GPRIS*APNVDFNLEGPK	-1	-1	-1	-1
Lowdose_2rad_IMAC_MSA1	10269	1	2	4.0252	256.9	0.208636	0.456767	4.93772	0.001666	YKDIIRQPS*EEEIIK	1194.27	138.594	-1	-1
Lowdose_2rad_IMAC_MSA1	4537	1	2	4.023	578.1	0.553915	0.744255	5.20798	0	SHS*PSASQSGSQLR	2223.99	117.124	-1	-1
Lowdose_2rad_IMAC_MSA1	9878	1	3	4.0193	235	0.456025	0.675296	3.90002	1.2e-05	QQSHFAMMHGGTGFAGIDSSS*PEVK	894.469	0	-1	-1
Lowdose_2rad_IMAC_MSA1	6703	1	4	4.0186	374.6	0.34415	0.586643	3.56071	6e-06	RTNS*DSALHQSTMTPTQPESFSSGSQDVHQK	1879.1	0	-1	-1
Lowdose_2rad_IMAC_MSA1	5740	1	2	4.0183	326.4	0.529204	0.727464	3.96835	0	HSS*ETFSSTPSATR	1894.67	46.4386	-1	-1
Lowdose_2rad_IMAC_MSA1	10725	1	2	4.0165	750.3	0.412897	0.642571	6.07381	1e-06	RVS*LSEIGFGK	1244.89	67.806	-1	-1
Lowdose_2rad_IMAC_MSA1	9793	1	2	4.0162	671.5	0.440416	0.663638	4.54273	1e-06	ILSQS*TDSLNMR	2098.51	56.5109	-1	-1
Lowdose_2rad_IMAC_MSA1	11868	1	3	4.0153	428.9	0.377182	0.614151	6.73579	1.7e-05	KQS*LGELIGTLNAAK	1112.01	108.668	-1	-1
Lowdose_2rad_IMAC_MSA1	13232	1	3	4.0153	521.6	0.355565	0.596293	4.79593	1.7e-05	IEEAMDGSET*PQLFTVLPEKR	1511.91	63.2703	-1	-1
Lowdose_2rad_IMAC_MSA1	3399	1	3	4.0135	393.4	0.463785	0.681018	6.4158	3e-06	KPIETGS*PKTK	1069.04	0	-1	-1
Lowdose_2rad_IMAC_MSA1	4367	1	2	4.0114	352.1	0.354066	0.595034	4.62443	2.2e-05	SYS*PDGKESPSDKK	1885.81	33.5845	-1	-1
Lowdose_2rad_IMAC_MSA1	11168	1	2	4.0108	39.8	0.318964	0.564769	-2.86314	0.000953	S*YDVPPPPMEPDHPFYSNISK	1149.12	0	-1	-1
Lowdose_2rad_IMAC_MSA1	2961	1	3	4.0102	730.4	0.245175	0.495151	5.46596	0.000243	NKKS*PEIHR	-1	-1	-1	-1
Lowdose_2rad_IMAC_MSA1	11971	1	3	4.01	275.6	0.295312	0.543426	4.46434	0.000448	ITPLSLQTQGSS*HETLNIVEEK	1110.99	0	-1	-1
Lowdose_2rad_IMAC_MSA1	11732	1	2	4.0087	338.2	0.279068	0.528269	8.08014	0.000158	KLEKEEEEGISQES*S*EEEQ	1660.57	163.987	112.251	-1
Lowdose_2rad_IMAC_MSA1	15334	1	2	4.0086	84.5	0.236866	0.486689	3.24694	0.002853	ALES*PERPFLAILGGAK	-1	-1	-1	-1
Lowdose_2rad_IMAC_MSA1	4565	1	3	4.0079	321.3	0.428354	0.654488	5.25697	1.2e-05	PGPTPSGTNVGS*SGRSPSKAVAAR	814.075	0	-1	-1
Lowdose_2rad_IMAC_MSA1	12148	1	2	4.0067	167	0.250006	0.500006	2.89498	0.000953	EVDGLLTSEPMGS*PVSSK	1893.23	50.7334	-1	-1
Lowdose_2rad_IMAC_MSA1	10789	1	4	4.0065	577.3	0.382503	0.618468	4.41593	0	GLLAQGLRPES*PPPAGPLLNGAPAGESPQPK	1331.32	60.3234	-1	-1
Lowdose_2rad_IMAC_MSA1	6301	1	3	4.0058	532.8	0.452868	0.672955	7.24224	1e-06	SDKS*PDLAPTPAPQSTPR	1558.98	19.1644	-1	-1
Lowdose_2rad_IMAC_MSA1	7303	1	2	4.0057	539.9	0.405822	0.637042	3.70204	3e-06	SPADPTDLGGQTS*PR	2522.77	40.5889	-1	-1
Lowdose_2rad_IMAC_MSA1	7806	1	3	4.0044	341.1	0.2046	0.452327	6.62581	0.003276	LGSLSARS*DSEATISR	633.863	0	-1	-1
Lowdose_2rad_IMAC_MSA1	13769	1	2	4.0036	161.8	0.485963	0.69711	5.05125	3e-06	ALS*PLSPVAIEQTSLK	1251.95	179.424	-1	-1
Lowdose_2rad_IMAC_MSA1	12798	1	2	4.0033	426.8	0.529188	0.727453	1.67053	0	ALS*IESLSPTDSSNGVNWR	1518.39	117.124	-1	-1
Lowdose_2rad_IMAC_MSA1	14697	1	2	4.0008	894.7	0.403469	0.635192	4.54835	1e-06	TSS*EDNLYLAVLR	1888.38	56.5109	-1	-1
Lowdose_2rad_IMAC_MSA1	13222	1	2	4.0007	623.8	0.45507	0.674589	3.17081	1e-06	SQS*TTFNPDDMSEPEFK	1820.44	0	-1	-1
Lowdose_2rad_IMAC_MSA1	10392	1	3	3.998	272.6	0.395373	0.628787	5.74583	3.5e-05	KS*PRPAGPQLFLPDPDPQR	-1	-1	-1	-1
Lowdose_2rad_IMAC_MSA1	10416	1	3	3.9978	562.5	0.534994	0.731433	3.86038	0	RILS*DVTHSAVFGVPASK	1238.94	0	-1	-1
Lowdose_2rad_IMAC_MSA1	10686	1	2	3.9947	556.2	0.366686	0.605546	5.31146	8e-06	LIDLES*PTPESQK	1481.72	85.2262	-1	-1
Lowdose_2rad_IMAC_MSA1	14559	1	3	3.9947	374.9	0.272436	0.521954	3.76839	0.000448	S*ASPDDDLGSSNWEAADLGNEER	1992.32	0	-1	-1
Lowdose_2rad_IMAC_MSA1	8179	1	2	3.9945	129.4	0.3455	0.587792	4.53118	0.000116	KVELS*ES*EEDKGGK	-1	-1	-1	-1
Lowdose_2rad_IMAC_MSA1	13892	1	2	3.9944	1029.5	0.448453	0.669666	5.40414	0	S*TAALEEDAQILK	1350.6	0	-1	-1
Lowdose_2rad_IMAC_MSA1	8917	1	2	3.9931	529.2	0.373194	0.610896	4.00245	8e-06	GAGDGS*DEEVDGKADGAEAKPAE	-1	-1	-1	-1
Lowdose_2rad_IMAC_MSA1	9821	1	4	3.9921	256.5	0.43784	0.661695	3.92275	1e-06	RPNEDS*DEDEEKGAVVPPVHDIYR	1990.52	216.15	-1	-1
Lowdose_2rad_IMAC_MSA1	9394	1	2	3.9895	555.5	0.371701	0.609673	6.4961	8e-06	LGS*SSNLQFK	1444.69	56.4386	-1	-1
Lowdose_2rad_IMAC_MSA1	6518	1	3	3.9865	465.1	0.362248	0.60187	5.65421	2.5e-05	NVAEALGHS*PKDPGGGGGPVR	-1	-1	-1	-1
Lowdose_2rad_IMAC_MSA1	8249	1	2	3.9862	787.5	0.363354	0.602789	6.70282	6e-06	RDS*WSYINSK	2070.94	119.755	-1	-1
Lowdose_2rad_IMAC_MSA1	14726	1	2	3.9857	471	0.487869	0.698476	2.10679	0	DLYRPLS*SDDLDSVGDSV	2775.73	46.5836	-1	-1
Lowdose_2rad_IMAC_MSA1	13965	1	2	3.9855	300.1	0.372124	0.61002	4.54307	1.6e-05	TIGGGDDS*FNTFFSETGAGK	1496.14	55.3598	-1	-1
Lowdose_2rad_IMAC_MSA1	5692	1	3	3.9844	744.3	0.493475	0.702478	6.85634	0	ADS*DSEDKGEESKPK	1534.52	67.806	-1	-1
Lowdose_2rad_IMAC_MSA1	14711	1	2	3.9841	1442.6	0.548129	0.740357	4.62005	0	S*IEVENDFLPVEK	-1	-1	-1	-1
Lowdose_2rad_IMAC_MSA1	8264	1	2	3.984	1076.4	0.330798	0.57515	0.744127	8e-06	HYEDGYPGGSDNYGS*LSR	2239.57	23.9593	-1	-1
Lowdose_2rad_IMAC_MSA1	2864	1	3	3.9838	342.9	0.37025	0.608482	6.98083	3.5e-05	TRHS*PTPQQSNR	1211.74	119.204	-1	-1
Lowdose_2rad_IMAC_MSA1	4360	1	2	3.9827	682.6	0.459236	0.67767	4.57513	1e-06	RPEGPGAQAPSS*PR	2272.57	33.2193	-1	-1
Lowdose_2rad_IMAC_MSA1	9696	1	2	3.982	227	0.340708	0.583702	4.09557	6.1e-05	RLS*NVSLTGVSTIR	1179.44	83.4288	-1	-1
Lowdose_2rad_IMAC_MSA1	12137	1	2	3.9798	954.7	0.562491	0.749994	5.9602	0	SPS*FGAGEGLLR	1966.2	56.5109	-1	-1
Lowdose_2rad_IMAC_MSA1	10261	1	2	3.9794	920.1	0.386742	0.621886	4.41784	2e-06	VPS*S*DEEVVEEPQSR	1989.79	124.469	129.71	-1
Lowdose_2rad_IMAC_MSA1	4021	1	2	3.9759	254.5	0.281798	0.530846	5.96985	0.000216	RQSPSPST*RPIR	1996.29	27.0275	-1	-1
Lowdose_2rad_IMAC_MSA1	11532	1	3	3.9757	248.1	0.323817	0.569049	4.73434	0.000331	KLEKEEEEGIS*QES*S*EEEQ	-1	-1	-1	-1
Lowdose_2rad_IMAC_MSA1	9846	1	2	3.9753	274.6	0.382814	0.61872	-1.00819	1.6e-05	SQRY*SGAYGASVSDEELK	873.758	0	-1	-1
Lowdose_2rad_IMAC_MSA1	5479	1	2	3.9746	259.9	0.375736	0.612973	3.27006	2.2e-05	AEVLGHKT*PEPAPR	-1	-1	-1	-1
Lowdose_2rad_IMAC_MSA1	7963	1	3	3.9744	329.9	0.423687	0.650912	7.89937	1.2e-05	KEKT*PELPEPSVK	1338.61	137.299	-1	-1
Lowdose_2rad_IMAC_MSA1	14789	1	2	3.9736	155.6	0.408144	0.638861	2.04208	2.2e-05	MES*PIPILPLPTPDAETEK	1260.68	198.337	-1	-1
Lowdose_2rad_IMAC_MSA1	3803	1	2	3.9734	263.7	0.439548	0.662984	5.55479	4e-06	HNS*TTSSTSSGGYR	1687.55	36.4386	-1	-1
Lowdose_2rad_IMAC_MSA1	11228	1	3	3.9733	193.5	0.333149	0.577191	3.82492	0.000448	KLEKEEEEGIS*QES*S*EEEQ	-1	-1	-1	-1
Lowdose_2rad_IMAC_MSA1	5669	1	2	3.9727	282.4	0.263196	0.513026	4.63493	0.000294	KGDRSPEPGQT*WTR	1830.6	76.5346	-1	-1
Lowdose_2rad_IMAC_MSA1	9923	1	3	3.9708	671.7	0.316007	0.562145	6.61162	3.5e-05	HIKEEPLS*EEEPCTSTAIASPEKK	1292.34	41.4882	-1	-1
Lowdose_2rad_IMAC_MSA1	7953	1	3	3.9704	373.6	0.22431	0.473614	7.29486	0.001905	S*RDSGDENEPIQER	1375.6	33.936	-1	-1
Lowdose_2rad_IMAC_MSA1	14315	1	3	3.9682	166.3	0.315256	0.561477	3.73541	0.000812	S*SPGQTPEEGAQALAEFAALHGPALR	870.169	0	-1	-1
Lowdose_2rad_IMAC_MSA1	11243	1	3	3.968	656.9	0.323009	0.568339	4.6721	2.5e-05	HIKEEPLS*EEEPCTSTAIASPEK	2203.01	213.925	-1	-1
Lowdose_2rad_IMAC_MSA1	11528	1	3	3.9668	216	0.298553	0.5464	3.82723	0.000812	KLEKEEEEGISQES*S*EEEQ	1166.89	25.8855	25.8855	-1
Lowdose_2rad_IMAC_MSA1	11613	1	2	3.9666	126.8	0.357611	0.598006	5.93542	8.4e-05	T*SSAELSTSAPDEPLLQK	1439.38	0	-1	-1
Lowdose_2rad_IMAC_MSA1	11922	1	2	3.9662	477.3	0.37401	0.611564	4.54365	8e-06	RGGGSGGGEES*EGEEVDED	2729.94	126.334	-1	-1
Lowdose_2rad_IMAC_MSA1	7129	1	2	3.9644	152.5	0.265488	0.515255	5.6134	0.000715	LGAGGGS*PEKSPSAQELK	872.142	65.9605	-1	-1
Lowdose_2rad_IMAC_MSA1	14031	1	3	3.9619	287.2	0.323178	0.568487	5.56265	0.000243	RS*SVSTIQVEWPEPDLAPAIK	902.769	0	-1	-1
Lowdose_2rad_IMAC_MSA1	10569	1	2	3.959	174.9	0.237358	0.487194	2.38642	0.001263	AGMSSNQSIS*SPVLDAVPR	2252.3	0	-1	-1
Lowdose_2rad_IMAC_MSA1	12378	1	2	3.956	712.3	0.349899	0.591523	0.348764	8e-06	FNDS*EGDDT*EETEDYR	1887.68	248.642	109.531	-1
Lowdose_2rad_IMAC_MSA1	4553	1	2	3.9555	139.1	0.22063	0.469713	4.67323	0.002853	KGGHERPPS*PGLR	-1	-1	-1	-1
Lowdose_2rad_IMAC_MSA1	4142	1	2	3.9546	867.4	0.36431	0.603581	5.72097	4e-06	HVDSLSQRS*PK	1569.46	88.0884	-1	-1
Lowdose_2rad_IMAC_MSA1	8699	1	3	3.9544	912.9	0.495878	0.704186	6.63834	0	TDSREDEIS*PPPPNPVVK	1514.19	120.795	-1	-1
Lowdose_2rad_IMAC_MSA1	9021	1	3	3.954	621.9	0.354299	0.59523	7.37554	1.2e-05	VGS*LDNVGHLPAGGAVK	-1	-1	-1	-1
Lowdose_2rad_IMAC_MSA1	4506	1	3	3.9479	694.4	0.336103	0.579744	6.00141	1.7e-05	SVGKVEPSSQS*PGRS*PR	1106.76	49.3131	89.6469	-1
Lowdose_2rad_IMAC_MSA1	4655	1	2	3.9442	765.4	0.420389	0.648374	4.32513	1e-06	VSAGEPGSHPS*PAPR	1499.78	80.5339	-1	-1
Lowdose_2rad_IMAC_MSA1	9683	1	2	3.9427	499.4	0.465392	0.682196	5.48493	1e-06	YLLGDAPVS*PSSQK	2281.64	50.7334	-1	-1
Lowdose_2rad_IMAC_MSA1	8692	1	3	3.9421	971.8	0.450521	0.671209	4.05259	0	TDSREDEIS*PPPPNPVVK	1983.43	128.964	-1	-1
Lowdose_2rad_IMAC_MSA1	2867	1	2	3.9418	653.4	0.366381	0.605294	4.65832	8e-06	TRHS*PTPQQSNR	1092.2	75.2336	-1	-1
Lowdose_2rad_IMAC_MSA1	11578	1	3	3.9407	317.8	0.201284	0.448647	3.88352	0.004262	LHS*SNPNLSTLDFGEEK	2056.19	0	-1	-1
Lowdose_2rad_IMAC_MSA1	14252	1	3	3.933	543.6	0.421409	0.64916	3.03556	3e-06	GNSSS*PAPAASITSMLSPSFTPTSVIR	2068.5	28.879	-1	-1
Lowdose_2rad_IMAC_MSA1	3658	1	3	3.9315	572.7	0.379194	0.615787	5.29818	9e-06	THTTALAGRS*PS*PASGRR	1088.88	54.6837	66.8964	-1
Lowdose_2rad_IMAC_MSA1	10185	1	3	3.9307	282.2	0.358664	0.598886	6.40987	9.4e-05	SEDRRS*S*EEREAGEI	789.463	57.5362	66.0464	-1
Lowdose_2rad_IMAC_MSA1	4955	1	2	3.9302	342.2	0.420666	0.648588	4.20443	6e-06	AEDGATPSPSNET*PKK	1267.23	12.1046	-1	-1
Lowdose_2rad_IMAC_MSA1	7984	1	4	3.93	406.2	0.333308	0.577328	4.71609	9e-06	TKEYVSNDAAQS*DDEEKLQSQPTDTDGGR	1306.96	0.555	-1	-1
Lowdose_2rad_IMAC_MSA1	3339	1	2	3.9298	349.9	0.41511	0.64429	5.5277	6e-06	RESPS*PAPKPR	1490	44.0237	-1	-1
Lowdose_2rad_IMAC_MSA1	6445	1	3	3.9287	246.9	0.348385	0.590241	7.30446	0.000178	KQKGS*EENLDEAR	-1	-1	-1	-1
Lowdose_2rad_IMAC_MSA1	7562	1	2	3.928	373.1	0.300942	0.548582	5.61134	8.4e-05	AFGPGLQGGSAGS*PAR	783.274	96.2096	-1	-1
Lowdose_2rad_IMAC_MSA1	9173	1	2	3.9269	217.5	0.414347	0.643698	4.13548	1.1e-05	ERSPALKSPLQS*VVVR	2035.19	67.8546	-1	-1
Lowdose_2rad_IMAC_MSA1	14148	1	3	3.9233	648.4	0.438814	0.66243	5.90314	1e-06	SSS*PAPADIAQTVQEDLR	2082.55	0	-1	-1
Lowdose_2rad_IMAC_MSA1	14569	1	3	3.9228	323.8	0.299684	0.547434	2.01707	0.000331	GPEDSWLLLSAPGPTPAS*PRPAS*PCGK	1535.78	25.8184	33.1757	-1
Lowdose_2rad_IMAC_MSA1	12056	1	3	3.9226	459.5	0.328991	0.573577	5.54886	6.7e-05	KS*LDS*DESEDEEDDYQQK	1572.73	0	0	-1
Lowdose_2rad_IMAC_MSA1	4948	1	3	3.9223	280.3	0.404329	0.635869	6.07678	2.5e-05	RSS*PSARPPDVPGQQPQAAK	874.186	46.6551	-1	-1
Lowdose_2rad_IMAC_MSA1	6547	1	2	3.9211	317	0.562521	0.750014	0.608563	0	SPAVATSTAAPPPPSS*PLPSK	2326.31	40.807	-1	-1
Lowdose_2rad_IMAC_MSA1	14014	1	2	3.9192	1816.5	0.287355	0.536055	6.34674	1.1e-05	NVFTS*AEELER	2052.25	101.178	-1	-1
Lowdose_2rad_IMAC_MSA1	10681	1	2	3.919	215.6	0.252896	0.502888	4.91529	0.000715	GSLAS*LDS*LRK	1103.95	85.6197	96.1158	-1
Lowdose_2rad_IMAC_MSA1	12370	1	2	3.9169	528.2	0.41686	0.645647	-0.907995	3e-06	IYHLPDAES*DEDEDFKEQTR	2194.6	134.332	-1	-1
Lowdose_2rad_IMAC_MSA1	5483	1	2	3.9155	185.3	0.395045	0.628526	2.21699	2.2e-05	AEVLGHKT*PEPAPR	-1	-1	-1	-1
Lowdose_2rad_IMAC_MSA1	6114	1	2	3.9129	369.6	0.395308	0.628735	-5.10998	8e-06	ASPS*PQPSSQPLQIHR	1727.98	53.2444	-1	-1
Lowdose_2rad_IMAC_MSA1	8784	1	3	3.9118	138.1	0.331868	0.57608	3.05352	0.000812	QEASTGQSPEDHASLAPPLSPDHS*SLEAK	1137.8	0	-1	-1
Lowdose_2rad_IMAC_MSA1	9010	1	2	3.9095	841.7	0.262003	0.511862	9.29911	8.4e-05	SALLTQNGTGS*LPR	1677.49	85.9037	-1	-1
Lowdose_2rad_IMAC_MSA1	9278	1	2	3.9087	158.6	0.417914	0.646463	4.29976	1.6e-05	FSTYSQS*PPDTPSLR	858.542	48.7537	-1	-1
Lowdose_2rad_IMAC_MSA1	8304	1	4	3.9073	300.1	0.450413	0.671128	6.50764	0	GHY*EVTGSDDETGKLQGSGVSLASK	698.721	0	-1	-1
Lowdose_2rad_IMAC_MSA1	10258	1	2	3.9072	1104.2	0.506219	0.711491	3.7808	0	VPS*S*DEEVVEEPQSR	1934.63	55.2591	56.4657	-1
Lowdose_2rad_IMAC_MSA1	11103	1	2	3.9046	673.4	0.408211	0.638914	4.75276	2e-06	YNDWS*DDDDDSNESK	2613.71	149.534	-1	-1
Lowdose_2rad_IMAC_MSA1	9258	1	2	3.9043	541.4	0.401173	0.633382	-0.871321	4e-06	TSASEGNPYVSSTLSVPAS*PR	1879.16	76.8418	-1	-1
Lowdose_2rad_IMAC_MSA1	11633	1	3	3.903	151.7	0.375685	0.612931	-1.95061	0.000243	KPPGTPPPS*ALPLGAPPPDALPPGPTPEDSPSLETGSR	1117.5	36.9422	-1	-1
Lowdose_2rad_IMAC_MSA1	12665	1	2	3.9005	581.6	0.296706	0.544707	3.29083	6.1e-05	TVS*DLALQNAFGDR	1396.79	0	-1	-1
Lowdose_2rad_IMAC_MSA1	5796	1	3	3.8999	859.2	0.339598	0.58275	7.03949	9e-06	RPMEEDGEEKS*PSK	1535.04	42.5705	-1	-1
Lowdose_2rad_IMAC_MSA1	11965	1	2	3.899	1240.3	0.389767	0.624313	4.03566	1e-06	IS*MSEVDLNVAAPK	2144.46	72.8771	-1	-1
Lowdose_2rad_IMAC_MSA1	7329	1	3	3.8983	421.4	0.329323	0.573867	6.57071	6.7e-05	TRSPS*PT*LGESLAPHK	818.148	33.8658	33.8658	-1
Lowdose_2rad_IMAC_MSA1	12939	1	4	3.8968	402.1	0.420909	0.648775	2.9494	0	SHS*LDDLQVEPGAEQDVPTEVTEPPPQIVPEVPQK	1305.68	0	-1	-1
Lowdose_2rad_IMAC_MSA1	5969	1	2	3.896	222	0.432521	0.657663	6.35159	8e-06	HGLQLGAQS*PGR	-1	-1	-1	-1
Lowdose_2rad_IMAC_MSA1	9599	1	2	3.8946	152.6	0.443203	0.665735	9.80954	1.1e-05	MAPTPIPTRS*PSDSSTASTPVAEQIER	1537.93	46.6551	-1	-1
Lowdose_2rad_IMAC_MSA1	8935	1	2	3.8925	541	0.311985	0.558556	4.6448	4.4e-05	SPSLSPSPPS*PLEK	1738.13	94.1937	-1	-1
Lowdose_2rad_IMAC_MSA1	11464	1	3	3.8901	99.5	0.358217	0.598512	-10.6517	0.000812	CHT*DQLEES*LLIGAVLKGLLVFGLHSI	150.236	35.6649	27.0713	-1
Lowdose_2rad_IMAC_MSA1	9171	1	4	3.8901	850	0.310223	0.556977	7.04434	2e-06	SPEKIEEVLSPEGSPSKS*PSK	2365.06	15.3994	-1	-1
Lowdose_2rad_IMAC_MSA1	11272	1	2	3.888	377.6	0.244856	0.494829	1.44023	0.000397	AAPEASS*PPASPLQHLLPGK	1686.42	34.7393	-1	-1
Lowdose_2rad_IMAC_MSA1	10625	1	2	3.8857	1019.9	0.343181	0.585817	6.28335	8e-06	KQIT*MEELVR	-1	-1	-1	-1
Lowdose_2rad_IMAC_MSA1	13019	1	3	3.8857	406.3	0.408472	0.639118	2.43475	9e-06	SSKASLGS*LEGEAEAEASSPK	1620.62	31.309	-1	-1
Lowdose_2rad_IMAC_MSA1	8013	1	3	3.8855	194.7	0.378587	0.615294	5.10974	0.000129	TKFAS*DDEHDEHDENGATGPVK	1541.91	22.0918	-1	-1
Lowdose_2rad_IMAC_MSA1	11905	1	2	3.8839	662.7	0.525966	0.725235	0.248981	0	IQEQES*S*GEEDSDLSPEER	2223.25	177.167	189.306	-1
Lowdose_2rad_IMAC_MSA1	12909	1	3	3.8821	283.9	0.30414	0.551489	6.55827	0.000331	VEMYS*GS*DDDDDFNKLPK	809.376	31.0284	103.892	-1
Lowdose_2rad_IMAC_MSA1	10824	1	2	3.8806	237.8	0.250245	0.500245	4.84597	0.000715	RAS*QEANLLTLAQK	425.617	100.86	-1	-1
Lowdose_2rad_IMAC_MSA1	7943	1	2	3.8801	663.5	0.472204	0.687171	3.17057	0	TTKS*PSDSGYSYETIGK	1440.62	50.7334	-1	-1
Lowdose_2rad_IMAC_MSA1	10846	1	2	3.88	406.5	0.351753	0.593088	4.02821	2.2e-05	RAS*QEANLLTLAQK	705.928	138.873	-1	-1
Lowdose_2rad_IMAC_MSA1	13194	1	2	3.8799	812.1	0.398773	0.631485	4.50256	2e-06	ATNES*EDEIPQLVPIGK	2297.07	51.4491	-1	-1
Lowdose_2rad_IMAC_MSA1	3808	1	2	3.8792	555.1	0.424366	0.651434	4.85054	2e-06	ASEDTTS*GSPPKK	977.556	18.1803	-1	-1
Lowdose_2rad_IMAC_MSA1	10849	1	4	3.8762	615.9	0.475749	0.689746	4.65099	0	LLKEGEEPTVY*SDEEEPKDESAR	1151.78	0	-1	-1
Lowdose_2rad_IMAC_MSA1	11974	1	3	3.8759	501.1	0.215898	0.464648	4.29532	0.001084	TSEIEPKNS*PEDLGLSLTGDSCK	1548.71	109.767	-1	-1
Lowdose_2rad_IMAC_MSA1	4679	1	2	3.8757	128.3	0.300591	0.548262	5.18328	0.000397	KADRDQS*PFSK	880.452	66.0514	-1	-1
Lowdose_2rad_IMAC_MSA1	8116	1	3	3.8747	446.3	0.270447	0.520045	9.58439	0.000331	KQS*EADLAETRPDLK	680.795	93.5106	-1	-1
Lowdose_2rad_IMAC_MSA1	8529	1	2	3.8746	304.6	0.219403	0.468405	5.59916	0.001263	KGS*ITEYTAAEEK	1616.46	112.877	-1	-1
Lowdose_2rad_IMAC_MSA1	9155	1	2	3.8734	846.5	0.263644	0.513463	4.75828	8.4e-05	SPSGSAFGS*QENLR	1413.57	72.1272	-1	-1
Lowdose_2rad_IMAC_MSA1	11156	1	3	3.8712	434.7	0.406799	0.637808	5.19888	9e-06	KLEKEEEEGISQES*S*EEEQ	1482.2	0	0	-1
Lowdose_2rad_IMAC_MSA1	8057	1	2	3.8711	817.1	0.558084	0.74705	5.19788	0	KRET*DDEGEDD	-1	-1	-1	-1
Lowdose_2rad_IMAC_MSA1	11075	1	3	3.8701	335.3	0.402522	0.634446	4.81742	1.7e-05	ALVEFESNPEETREPGS*PPSVQR	1530.45	0	-1	-1
Lowdose_2rad_IMAC_MSA1	9675	1	3	3.8667	344.6	0.223964	0.473248	5.58535	0.001905	ASQSRPNS*S*ALETLGGEK	663	9.5451	5.6165	-1
Lowdose_2rad_IMAC_MSA1	13804	1	2	3.8665	677.6	0.550369	0.741869	3.48095	0	VENMSSNQDGNDS*DEFM	2233.82	225.103	-1	-1
Lowdose_2rad_IMAC_MSA1	5963	1	3	3.8663	482.3	0.306443	0.553573	6.83882	9.4e-05	GRS*FAGNLNTYKR	988.641	104.459	-1	-1
Lowdose_2rad_IMAC_MSA1	13814	1	2	3.8661	431.9	0.449031	0.670098	4.32873	2e-06	EDS*FESLDSLGSR	1433.43	166.314	-1	-1
Lowdose_2rad_IMAC_MSA1	10736	1	3	3.865	355	0.279871	0.529028	3.29913	0.000448	IYGENGSKSMS*DVSAEDVQNLR	1309	0	-1	-1
Lowdose_2rad_IMAC_MSA1	10784	1	3	3.8648	618.1	0.200554	0.447833	6.41905	0.001084	VSHQGY*STEAEFEEPR	1594.23	0	-1	-1
Lowdose_2rad_IMAC_MSA1	5920	1	2	3.8647	239	0.454705	0.674318	5.11746	4e-06	SPGS*PVGEGTGSPPK	1646.62	71.078	-1	-1
Lowdose_2rad_IMAC_MSA1	13076	1	2	3.8647	371.8	0.220871	0.469969	2.27778	0.000953	NS*WDSPAFSNDVIR	1416.88	95.8731	-1	-1
Lowdose_2rad_IMAC_MSA1	2999	1	2	3.8635	423.4	0.352401	0.593634	7.46896	2.2e-05	RAS*PS*PPPKR	-1	-1	-1	-1
Lowdose_2rad_IMAC_MSA1	8926	1	3	3.8626	319	0.242971	0.492921	6.37675	0.001441	GGDVFGDTSFLSNHGGSSGSTHRS*PR	1502.52	51.9424	-1	-1
Lowdose_2rad_IMAC_MSA1	7901	1	4	3.8616	745.3	0.20274	0.450267	5.79881	0.000195	KGAGDGS*DEEVDGKADGAEAKPAE	-1	-1	-1	-1
Lowdose_2rad_IMAC_MSA1	8324	1	2	3.8615	1179.6	0.577858	0.76017	5.37206	0	SLYASS*PGGVYATR	2052.79	40.807	-1	-1
Lowdose_2rad_IMAC_MSA1	13380	1	2	3.8605	488.7	0.400829	0.633111	3.92207	6e-06	GGREGFES*DTDSEFTFK	1139.38	46.6551	-1	-1
Lowdose_2rad_IMAC_MSA1	9714	1	2	3.8596	403	0.310421	0.557154	3.62467	6.1e-05	S*YSAGNASQLEQLSR	1522.74	0	-1	-1
Lowdose_2rad_IMAC_MSA1	9777	1	3	3.858	300.5	0.2162	0.464973	6.51381	0.003276	RKPSVPDS*ASPADDSFVDPGER	1001.23	80.2378	-1	-1
Lowdose_2rad_IMAC_MSA1	12021	1	2	3.8562	356.6	0.469996	0.685563	3.69391	1e-06	FNDS*EGDDTEETEDYR	1106.9	89.8058	-1	-1
Lowdose_2rad_IMAC_MSA1	8611	1	4	3.8525	477.6	0.396652	0.629803	1.14653	1e-06	QRSDDES*PSTSSGSSDADQRDPAAPEPEEQEER	1123.62	27.3069	-1	-1
Lowdose_2rad_IMAC_MSA1	8376	1	2	3.8522	610	0.347723	0.58968	7.50493	1.6e-05	PSMS*PTPLDR	1808.96	36.8721	-1	-1
Lowdose_2rad_IMAC_MSA1	5773	1	3	3.8509	632.9	0.425199	0.652073	5.40286	2e-06	SEVQQPVHPKPLS*PDSR	1631.71	0	-1	-1
Lowdose_2rad_IMAC_MSA1	12917	1	3	3.8506	192.7	0.426115	0.652775	4.48791	4.8e-05	ELSNS*PLRENSFGSPLEFR	932.403	24.3056	-1	-1
Lowdose_2rad_IMAC_MSA1	8259	1	2	3.8496	1080.3	0.229193	0.478741	1.9006	0.000158	HYEDGYPGGSDNYGS*LSR	2665.42	0	-1	-1
Lowdose_2rad_IMAC_MSA1	10891	1	2	3.8485	398.1	0.212187	0.460638	5.48156	0.000953	DMES*PTKLDVTLAK	893.011	102.431	-1	-1
Lowdose_2rad_IMAC_MSA1	10340	1	2	3.8427	315.5	0.320009	0.565693	7.84844	8.4e-05	ESS*PLYS*PTFSDSTSAVK	1485.71	0	67.806	-1
Lowdose_2rad_IMAC_MSA1	14961	1	2	3.8407	476.2	0.227042	0.476489	4.52833	0.000534	KET*ES*EAEDNLDDLEK	-1	-1	-1	-1
Lowdose_2rad_IMAC_MSA1	8368	1	2	3.8395	611.4	0.327959	0.572677	6.28859	2.2e-05	PSMS*PTPLDR	1552.36	45.407	-1	-1
Lowdose_2rad_IMAC_MSA1	5647	1	3	3.8387	565.5	0.424493	0.651531	5.45752	3e-06	SKS*NPDFLKK	1227.78	24.3056	-1	-1
Lowdose_2rad_IMAC_MSA1	6119	1	2	3.8384	427	0.341001	0.583953	4.90572	3.1e-05	DLVQPDKPAS*PK	-1	-1	-1	-1
Lowdose_2rad_IMAC_MSA1	6508	1	3	3.8378	454.4	0.269946	0.519563	5.65421	0.000331	NVAEALGHS*PKDPGGGGGPVR	-1	-1	-1	-1
Lowdose_2rad_IMAC_MSA1	11915	1	2	3.8364	316.8	0.512616	0.715972	4.89839	1e-06	RGGGSGGGEES*EGEEVDED	2574.36	95.6345	-1	-1
Lowdose_2rad_IMAC_MSA1	13573	1	3	3.831	454.9	0.233281	0.482992	1.3033	0.000812	TGSSSPPGGPPKPGSQLDSMLGS*LQSDLNK	858.332	16.8905	-1	-1
Lowdose_2rad_IMAC_MSA1	12356	1	2	3.8296	439.1	0.438035	0.661842	2.22847	3e-06	FNDS*EGDDT*EETEDYR	2217.55	265.658	124.705	-1
Lowdose_2rad_IMAC_MSA1	9314	1	2	3.8293	596	0.339958	0.583059	5.70804	1.6e-05	TLS*DESIYNSQR	1483.22	56.5109	-1	-1
Lowdose_2rad_IMAC_MSA1	10467	1	2	3.8282	340.8	0.208688	0.456824	3.52537	0.001263	RTS*PQVLGSILK	1400.86	0	-1	-1
Lowdose_2rad_IMAC_MSA1	5559	1	2	3.828	442.1	0.161625	0.402026	5.28727	0.003703	RSS*TSSEPTPTVK	851.297	38.365	-1	-1
Lowdose_2rad_IMAC_MSA1	5520	1	2	3.8273	258.9	0.466569	0.683059	4.5735	3e-06	NSASATTPLSGNS*SR	1284.92	0	-1	-1
Lowdose_2rad_IMAC_MSA1	13523	1	2	3.8272	685.7	0.395015	0.628502	4.83714	4e-06	AS*GQAFELILSPR	1418.26	213.925	-1	-1
Lowdose_2rad_IMAC_MSA1	8790	1	4	3.8267	108.4	0.456921	0.675959	3.61852	6e-06	QEASTGQSPEDHASLAPPLS*PDHSSLEAK	885.548	35.3144	-1	-1
Lowdose_2rad_IMAC_MSA1	13566	1	3	3.8264	433.9	0.387309	0.622342	5.24953	1.7e-05	VVKPKS*PEPEATLTFPFLDK	2251.54	131.287	-1	-1
Lowdose_2rad_IMAC_MSA1	10019	1	2	3.826	451.1	0.212833	0.461338	5.95222	0.000953	CRS*PGMLEPLGSSR	1819.56	266.45	-1	-1
Lowdose_2rad_IMAC_MSA1	14996	1	3	3.8253	293.7	0.239328	0.489212	3.15863	0.001905	TGSS*SPPGGPPKPGSQLDSMLGSLQSDLNK	1447.96	0	-1	-1
Lowdose_2rad_IMAC_MSA1	13627	1	2	3.824	468.2	0.461088	0.679035	4.50225	1e-06	GSLLTILGSPS*PER	1449.82	132.095	-1	-1
Lowdose_2rad_IMAC_MSA1	9787	1	2	3.8232	639.4	0.353709	0.594734	4.87546	1.1e-05	ILSQS*TDSLNMR	1961.39	56.5109	-1	-1
Lowdose_2rad_IMAC_MSA1	5986	1	2	3.8228	274.7	0.440018	0.663339	6.30612	6e-06	ALSAS*HTDLAH	852.206	81.1779	-1	-1
Lowdose_2rad_IMAC_MSA1	14560	1	3	3.8227	318.8	0.22798	0.477473	1.50848	0.001905	GPEDSWLLLSAPGPTPAS*PRPAS*PCGK	1666.79	44.4458	105.07	-1
Lowdose_2rad_IMAC_MSA1	12550	1	2	3.8215	506.5	0.482167	0.694382	5.87127	1e-06	TCS*FGGFDLTNR	2053.22	56.5109	-1	-1
Lowdose_2rad_IMAC_MSA1	8317	1	2	3.8177	918.8	0.385101	0.620565	4.00606	3e-06	SLYAS*SPGGVYATR	2476.39	76.73	-1	-1
Lowdose_2rad_IMAC_MSA1	12683	1	3	3.8165	545.4	0.582838	0.763438	5.75504	0	SLDS*DES*EDEEDDYQQK	1857.6	8.556	8.556	-1
Lowdose_2rad_IMAC_MSA1	13263	1	2	3.8162	646.8	0.396704	0.629844	4.62638	4e-06	GMYDGPVFDLTTT*PK	2589.31	40.5889	-1	-1
Lowdose_2rad_IMAC_MSA1	7950	1	2	3.8161	349.7	0.519116	0.720497	5.12755	0	S*SSVGSSSSYPISPAVSR	2091.2	0	-1	-1
Lowdose_2rad_IMAC_MSA1	8541	1	2	3.8153	284.6	0.451419	0.671877	4.98269	4e-06	SFSLASSSNS*PISQR	1916.27	45.407	-1	-1
Lowdose_2rad_IMAC_MSA1	14010	1	3	3.8153	744.4	0.310985	0.55766	5.17985	3.5e-05	EPES*PPASAPIPLFGADTIGQR	1458.91	6.1856	-1	-1
Lowdose_2rad_IMAC_MSA1	9811	1	2	3.8152	301.5	0.370177	0.608422	0.759888	2.2e-05	VRPAS*TGGLSLLPPPPGGK	1332.92	56.5109	-1	-1
Lowdose_2rad_IMAC_MSA1	7554	1	3	3.8138	512.6	0.309665	0.556476	5.93892	9.4e-05	SGKNSQEDS*EDSEDKDVK	1068.54	0	-1	-1
Lowdose_2rad_IMAC_MSA1	11958	1	2	3.812	383.1	0.320199	0.565861	3.42976	6.1e-05	ASVSPMDEPVPDSES*PIEK	1933.21	67.806	-1	-1
Lowdose_2rad_IMAC_MSA1	14630	1	2	3.8115	1566.3	0.406428	0.637517	2.33936	1e-06	DWEDDS*DEDMSNFDR	1781.12	203.5	-1	-1
Lowdose_2rad_IMAC_MSA1	12561	1	2	3.8112	169.1	0.187789	0.433346	-11.2898	0.00478	NATLAESRPVS*LAGS*T*TK	344.207	60.8817	0	0
Lowdose_2rad_IMAC_MSA1	7949	1	2	3.8111	487.1	0.400541	0.632883	5.05438	6e-06	TTKSPS*DSGYSYETIGK	1420.12	55.5643	-1	-1
Lowdose_2rad_IMAC_MSA1	8152	1	2	3.8109	278.3	0.333228	0.577259	5.04464	6.1e-05	SIS*NEGLTLNNSHVSK	1568.39	0	-1	-1
Lowdose_2rad_IMAC_MSA1	11326	1	2	3.8091	495.2	0.386889	0.622004	4.64919	8e-06	SLS*SPTVTLSAPLEGAK	1194.52	0	-1	-1
Lowdose_2rad_IMAC_MSA1	4365	1	3	3.8083	656.1	0.498254	0.705871	6.79815	0	SYS*PDGKESPSDKK	690.798	46.5836	-1	-1
Lowdose_2rad_IMAC_MSA1	14029	1	2	3.8081	326.1	0.436937	0.661012	5.06905	4e-06	LFVLLPEQS*PVSYSK	2269.68	80.2378	-1	-1
Lowdose_2rad_IMAC_MSA1	11980	1	3	3.8079	227.4	0.374091	0.61163	3.30548	9.4e-05	SEPVKEESSELEQPFAQDT*SSVGPDR	1253.05	27.3069	-1	-1
Lowdose_2rad_IMAC_MSA1	4208	1	3	3.8077	516.2	0.300391	0.548079	7.81721	9.4e-05	THTTALAGRS*PS*PASGR	703.641	0	0	-1
Lowdose_2rad_IMAC_MSA1	13617	1	2	3.8073	391.5	0.444856	0.666975	4.42406	3e-06	GSLLTILGSPS*PER	1513.42	119.755	-1	-1
Lowdose_2rad_IMAC_MSA1	4016	1	2	3.8037	442.1	0.229356	0.478911	1.99899	0.000534	RQSPS*PSTRPIR	2253.06	50.1105	-1	-1
Lowdose_2rad_IMAC_MSA1	5666	1	2	3.8035	268.3	0.293598	0.541847	1.47396	0.000216	KGDRSPEPGQT*WTR	1997.39	67.5636	-1	-1
Lowdose_2rad_IMAC_MSA1	7923	1	2	3.8031	271	0.299124	0.546922	4.7211	0.000158	HTGPNS*PDTANDGFVR	993.329	31.309	-1	-1
Lowdose_2rad_IMAC_MSA1	6335	1	2	3.8028	245.7	0.335674	0.579374	6.98357	8.4e-05	RGNDPLTSS*PGR	789.395	28.879	-1	-1
Lowdose_2rad_IMAC_MSA1	7168	1	2	3.8027	455.2	0.270098	0.51971	8.20176	0.000158	RVQT*PLLR	-1	-1	-1	-1
Lowdose_2rad_IMAC_MSA1	12609	1	3	3.8017	328	0.248494	0.498492	3.24029	0.001084	SLS*EGLYPYPPEMGKPATGDFGYR	1084.86	46.6551	-1	-1
Lowdose_2rad_IMAC_MSA1	14137	1	3	3.8008	430.6	0.47048	0.685915	6.30145	2e-06	SSLS*GDEEDELFKGATLK	1462.59	75.9104	-1	-1
Lowdose_2rad_IMAC_MSA1	5661	1	3	3.7994	628.2	0.406696	0.637727	6.40254	3e-06	KGDRS*PEPGQTWTR	1168.94	191.012	-1	-1
Lowdose_2rad_IMAC_MSA1	6799	1	2	3.7975	194.4	0.47339	0.688033	3.91235	4e-06	QAS*TDAGTAGALTPQHVR	2217.79	33.2193	-1	-1
Lowdose_2rad_IMAC_MSA1	12267	1	2	3.7967	436.7	0.327205	0.572018	5.69959	4.4e-05	FAIQDIS*VEETSAK	1493.39	61.5698	-1	-1
Lowdose_2rad_IMAC_MSA1	7618	1	3	3.7964	160	0.396428	0.629625	5.45042	0.000129	APS*PAPSSVPLGSEKPSNVSQDR	835.723	38.5173	-1	-1
Lowdose_2rad_IMAC_MSA1	4393	1	4	3.7941	812.7	0.409715	0.64009	4.83993	0	RAHT*PTPGIYMGRPTHSGGGGGGGGGGGGGGGGR	2385.24	0	-1	-1
Lowdose_2rad_IMAC_MSA1	12075	1	3	3.794	523.7	0.230021	0.479605	3.76362	0.000812	ATLSSTSGLDLMSESGEGEIS*PQREVSR	1165.48	0	-1	-1
Lowdose_2rad_IMAC_MSA1	13319	1	3	3.7936	396.6	0.277467	0.526751	5.30863	0.000331	WLAES*PVGLPPEEEDKLTR	1258.04	78.2929	-1	-1
Lowdose_2rad_IMAC_MSA1	13307	1	4	3.7934	389.9	0.2667	0.51643	5.67882	9.4e-05	MVIQGPSS*PQGEAMVTDVLEDQKEGR	1756.11	46.5836	-1	-1
Lowdose_2rad_IMAC_MSA1	11284	1	3	3.7933	554.8	0.22081	0.469904	4.8509	0.000812	IQEQES*S*GEEDSDLSPEEREK	954.052	69.295	57.9641	-1
Lowdose_2rad_IMAC_MSA1	8248	1	2	3.7928	221.9	0.256539	0.506497	6.06555	0.000715	S*STPLPTISSSAENTR	1870.29	31.0284	-1	-1
Lowdose_2rad_IMAC_MSA1	13710	1	3	3.7927	931.5	0.302924	0.550385	6.76936	2.5e-05	KS*PNELVDDLFK	-1	-1	-1	-1
Lowdose_2rad_IMAC_MSA1	8006	1	2	3.7924	217.2	0.328051	0.572757	5.12045	0.000116	GTDDS*PKDSQEDLQER	1577.35	28.097	-1	-1
Lowdose_2rad_IMAC_MSA1	8011	1	3	3.7922	599.3	0.263198	0.513028	6.65208	0.000243	GTDDS*PKDSQEDLQER	1423.15	0	-1	-1
Lowdose_2rad_IMAC_MSA1	10896	1	3	3.7898	218.9	0.314951	0.561205	5.35409	0.000448	YLCEGT*ESPYQTGQLHPAIR	830.281	24.5066	-1	-1
Lowdose_2rad_IMAC_MSA1	10521	1	2	3.7896	733.2	0.358138	0.598446	3.5322	8e-06	VPS*S*DEEVVEEPQSR	1369.09	236.142	200.761	-1
Lowdose_2rad_IMAC_MSA1	8569	1	3	3.7895	856.3	0.447447	0.668915	4.82831	0	TDSREDEIS*PPPPNPVVK	1782.4	90.557	-1	-1
Lowdose_2rad_IMAC_MSA1	5140	1	2	3.7893	456.1	0.322118	0.567554	5.08008	4.4e-05	ATAPQTQHVS*PMR	1596.16	133.519	-1	-1
Lowdose_2rad_IMAC_MSA1	10089	1	3	3.7873	210.8	0.357431	0.597855	5.04979	0.000178	SPSLSPSPPS*PLEKTPLGER	490.178	1.1842	-1	-1
Lowdose_2rad_IMAC_MSA1	12066	1	2	3.7853	98.6	0.55668	0.74611	9.60242	2e-06	KLEKEEEEGIS*QES*S*EEEQ	-1	-1	-1	-1
Lowdose_2rad_IMAC_MSA1	5717	1	3	3.7852	651.8	0.33314	0.577183	7.60094	2.5e-05	NDKS*EEEQSSSSVK	1120.35	141.908	-1	-1
Lowdose_2rad_IMAC_MSA1	4958	1	3	3.7851	243.2	0.381654	0.617782	4.98608	6.7e-05	RSS*PSARPPDVPGQQPQAAK	791.376	28.879	-1	-1
Lowdose_2rad_IMAC_MSA1	6358	1	2	3.784	151.8	0.4125	0.642262	-1.11867	2.2e-05	AKTQT*PPVSPAPQPTEER	1147.07	56.5109	-1	-1
Lowdose_2rad_IMAC_MSA1	13625	1	3	3.784	683.2	0.285174	0.534017	5.05792	9.4e-05	FDIYDPFHPTDEAYS*PPPAPEQK	1665.03	0	-1	-1
Lowdose_2rad_IMAC_MSA1	10255	1	2	3.7816	210.8	0.345277	0.587603	4.72615	8.4e-05	LGAPENSGIS*TLER	1397.55	0	-1	-1
Lowdose_2rad_IMAC_MSA1	4107	1	2	3.7793	401.8	0.367581	0.606285	3.78784	1.6e-05	AEDGATPSPS*NETPKKK	1711.66	44.4458	-1	-1
Lowdose_2rad_IMAC_MSA1	13554	1	2	3.7771	78	0.443224	0.665751	5.80551	3.1e-05	DMDEPS*PVPNVEEVTLPK	1491.09	79.2097	-1	-1
Lowdose_2rad_IMAC_MSA1	12607	1	2	3.7768	402.7	0.351991	0.593288	4.72319	2.2e-05	S*SGFISELPSEEGK	1191.83	0	-1	-1
Lowdose_2rad_IMAC_MSA1	11166	1	3	3.7746	549.3	0.339056	0.582285	4.50521	3.5e-05	METEADAPS*PAPS*LGERLEPR	1140.54	99.8904	121.918	-1
Lowdose_2rad_IMAC_MSA1	4539	1	2	3.7736	177	0.326214	0.571151	5.5023	0.000158	RQS*PS*PSTRPIR	1241.36	80.8119	80.8119	-1
Lowdose_2rad_IMAC_MSA1	13913	1	3	3.7725	291.6	0.228231	0.477735	2.45582	0.002505	S*DSPEIPFQAAAGPSDGLDASSPGNSFVGLR	2005.65	0	-1	-1
Lowdose_2rad_IMAC_MSA1	8430	1	2	3.7661	365.5	0.352009	0.593303	5.73246	3.1e-05	RGS*LSNAGDPEIVK	407.382	35.1743	-1	-1
Lowdose_2rad_IMAC_MSA1	8181	1	3	3.766	138.3	0.38837	0.623193	5.36652	0.000243	TPKDS*PGIPPSANAHQLFR	795.3	0	-1	-1
Lowdose_2rad_IMAC_MSA1	14564	1	3	3.7639	620.6	0.224076	0.473367	5.37091	0.000605	S*ASPDDDLGSSNWEAADLGNEER	2806.24	0	-1	-1
Lowdose_2rad_IMAC_MSA1	4962	1	2	3.7599	277.7	0.438708	0.66235	4.69174	6e-06	AEDGATPSPSNET*PKK	1449.05	10.937	-1	-1
Lowdose_2rad_IMAC_MSA1	9139	1	3	3.7595	159.7	0.486847	0.697744	6.71816	1.7e-05	ERS*PALKSPLQSVVVR	844.636	71.0801	-1	-1
Lowdose_2rad_IMAC_MSA1	4419	1	2	3.7589	266.3	0.248317	0.498314	1.46877	0.000715	GGS*REYDTGGGSSSSR	737.211	107.22	-1	-1
Lowdose_2rad_IMAC_MSA1	7127	1	3	3.7586	275.8	0.244985	0.49496	6.25494	0.001905	MGPSGGEGMEPERRDS*QDGSSYR	1321.67	0	-1	-1
Lowdose_2rad_IMAC_MSA1	4538	1	3	3.7569	370.5	0.371556	0.609554	6.56032	3.5e-05	TNTMNGSKS*PVISRPK	1036.19	19.0998	-1	-1
Lowdose_2rad_IMAC_MSA1	15102	1	3	3.7562	223.2	0.230712	0.480325	4.83104	0.004262	TGSSS*PPGGPPKPGSQLDSMLGSLQSDLNK	1525.66	27.0275	-1	-1
Lowdose_2rad_IMAC_MSA1	6617	1	2	3.7558	801.6	0.186458	0.431808	6.06024	0.000953	MLEEKS*PEKVK	-1	-1	-1	-1
Lowdose_2rad_IMAC_MSA1	3125	1	2	3.7556	617.1	0.34788	0.589814	5.17109	1.6e-05	ARS*VS*PPPKR	-1	-1	-1	-1
Lowdose_2rad_IMAC_MSA1	10272	1	3	3.7554	343	0.420168	0.648204	6.4155	1.2e-05	RALS*SAGPIPIRPPIVPVK	1552.94	36.73	-1	-1
Lowdose_2rad_IMAC_MSA1	9622	1	3	3.7548	316.6	0.262544	0.51239	2.78318	0.000812	S*ASTESGFHNHTDTAEGDVIAAAR	836.389	0	-1	-1
Lowdose_2rad_IMAC_MSA1	8004	1	3	3.7533	468.8	0.311353	0.55799	7.66316	9.4e-05	GTDDS*PKDSQEDLQER	1861.14	42.3862	-1	-1
Lowdose_2rad_IMAC_MSA1	14760	1	2	3.753	435.6	0.560192	0.74846	6.49806	0	GS*PEEELPLPAFEK	-1	-1	-1	-1
Lowdose_2rad_IMAC_MSA1	11983	3	3	3.7515	265.3	0.484659	0.696175	6.23312	4e-06	ASLGSLEGEAEAEAS*SPKGK	1057.69	33.5845	-1	-1
Lowdose_2rad_IMAC_MSA1	9865	1	3	3.7467	169.1	0.30264	0.550127	3.38834	0.001084	KLEEVLST*EGAEENGNSDKK	451.541	40.8784	-1	-1
Lowdose_2rad_IMAC_MSA1	6622	1	2	3.7466	645.6	0.282256	0.531278	6.17831	8.4e-05	VKT*PEMIIQKPK	-1	-1	-1	-1
Lowdose_2rad_IMAC_MSA1	4037	1	2	3.7454	785	0.398996	0.631661	4.57032	3e-06	IRSS*VEKENQK	962.946	0	-1	-1
Lowdose_2rad_IMAC_MSA1	8801	1	2	3.745	140.2	0.466435	0.68296	2.06543	8e-06	S*SSPGKLLGSGYGGLTGGSSR	1038.28	0	-1	-1
Lowdose_2rad_IMAC_MSA1	3815	1	2	3.7446	448.1	0.441329	0.664326	5.70569	3e-06	ASEDTTS*GSPPKK	1122.04	36.73	-1	-1
Lowdose_2rad_IMAC_MSA1	10833	1	3	3.7442	402.8	0.263715	0.513532	7.69651	0.000448	VQSLEGEKLS*PKS*DISPLTPR	916.203	44.3027	85.3814	-1
Lowdose_2rad_IMAC_MSA1	11340	1	2	3.7393	512.3	0.484369	0.695966	3.74882	1e-06	GIS*QTNLITTVTPEK	1144.77	76.73	-1	-1
Lowdose_2rad_IMAC_MSA1	13153	1	2	3.7393	62.9	0.259086	0.509005	1.79223	0.002853	S*STPPGESYFGVSSLQLK	1083.48	0	-1	-1
Lowdose_2rad_IMAC_MSA1	9703	1	3	3.7389	338.6	0.3244	0.569561	5.30484	0.000129	EEDEPEERS*GDETPGSEVPGDK	808.629	106.002	-1	-1
Lowdose_2rad_IMAC_MSA1	5635	1	2	3.7384	1054.2	0.391344	0.625575	5.44752	2e-06	TRS*NPEGAEDR	1714.51	46.5836	-1	-1
Lowdose_2rad_IMAC_MSA1	11728	1	3	3.738	332.2	0.254173	0.504156	3.412	0.001084	ERDTSPDKGELVS*DEEEDT	677.532	53.5061	-1	-1
Lowdose_2rad_IMAC_MSA1	4813	1	3	3.7379	418.3	0.358731	0.598942	6.715	3.5e-05	KGPAAPPPT*PVKPPR	-1	-1	-1	-1
Lowdose_2rad_IMAC_MSA1	6706	1	2	3.7372	453.7	0.193969	0.440419	5.87588	0.001666	ILEQQNSSRT*LEK	433.087	31.309	-1	-1
Lowdose_2rad_IMAC_MSA1	3207	1	3	3.7361	333.8	0.309226	0.556081	6.24038	0.000243	VKS*PSKQAPGEK	1374.87	55.8014	-1	-1
Lowdose_2rad_IMAC_MSA1	10386	1	2	3.7349	542.9	0.454791	0.674382	4.83002	1e-06	AITSLLGGGS*PK	1529.41	152.781	-1	-1
Lowdose_2rad_IMAC_MSA1	13275	1	2	3.7344	296.8	0.34059	0.583601	5.91289	6.1e-05	ELGS*TEDIYLASR	1083.03	36.73	-1	-1
Lowdose_2rad_IMAC_MSA1	12552	1	2	3.7341	266.1	0.339653	0.582798	4.91395	6.1e-05	VSS*PSPELGTTPASIFR	1692.22	0	-1	-1
Lowdose_2rad_IMAC_MSA1	12460	1	2	3.7324	120.7	0.347176	0.589216	9.30741	0.000158	SFGTRPLS*SGFSPEEAQQQDEEFEK	881.186	0	-1	-1
Lowdose_2rad_IMAC_MSA1	7122	1	3	3.7324	394.5	0.428598	0.654674	7.28727	6e-06	FAS*DDEHDEHDENGATGPVKR	1584.37	188.451	-1	-1
Lowdose_2rad_IMAC_MSA1	13891	1	2	3.7279	675.1	0.403069	0.634877	5.30014	3e-06	VDS*TTCLFPVEEK	1439.93	50.5889	-1	-1
Lowdose_2rad_IMAC_MSA1	11769	1	3	3.7263	496.1	0.341304	0.584212	5.2114	3.5e-05	AIGGIILTAS*HNPGGPNGDFGIK	1879.43	44.4458	-1	-1
Lowdose_2rad_IMAC_MSA1	11993	1	2	3.7262	301.1	0.32878	0.573393	3.36559	8.4e-05	ASLGSLEGEAEAEASS*PKGK	1262.64	0	-1	-1
Lowdose_2rad_IMAC_MSA1	5641	1	2	3.7258	1314.6	0.325433	0.570467	5.63032	8e-06	TRS*NPEGAEDR	1913.46	56.5109	-1	-1
Lowdose_2rad_IMAC_MSA1	10617	1	2	3.7258	1198.5	0.255516	0.505486	4.31798	8.4e-05	KQIT*MEELVR	-1	-1	-1	-1
Lowdose_2rad_IMAC_MSA1	4575	1	3	3.7257	321.9	0.255093	0.505067	5.8391	0.001084	GGTPAGSARGS*PTRPNPPVR	591.29	75.9104	-1	-1
Lowdose_2rad_IMAC_MSA1	9689	1	2	3.7225	659.6	0.432424	0.65759	4.78418	1e-06	YLLGDAPVS*PSSQK	2156.47	35.1743	-1	-1
Lowdose_2rad_IMAC_MSA1	3407	1	3	3.7165	381.3	0.411166	0.641222	6.54343	1.2e-05	SKT*PPKSYSTAR	1459.02	36.8721	-1	-1
Lowdose_2rad_IMAC_MSA1	10318	1	3	3.7152	413.1	0.198132	0.44512	5.55807	0.003276	S*SPPLRTPDVLESSGPAVR	1011.18	0	-1	-1
Lowdose_2rad_IMAC_MSA1	10265	1	3	3.7129	495.1	0.480056	0.692861	6.14879	1e-06	RALS*SAGPIPIRPPIVPVK	1443.54	33.5845	-1	-1
Lowdose_2rad_IMAC_MSA1	6181	1	2	3.7127	474.7	0.369489	0.607856	6.19806	1.1e-05	GGLS*PANDTGAK	1244.17	150.006	-1	-1
Lowdose_2rad_IMAC_MSA1	5994	1	2	3.7114	548.3	0.22703	0.476477	5.50559	0.000534	KSLS*DSESDDSK	1035.56	72.8771	-1	-1
Lowdose_2rad_IMAC_MSA1	14634	1	2	3.7113	1723.4	0.453749	0.673609	3.51144	0	DWEDDS*DEDMSNFDR	2647.95	203.631	-1	-1
Lowdose_2rad_IMAC_MSA1	8891	1	2	3.7111	125.4	0.429684	0.655503	-0.060358	2.2e-05	KTS*PASLDFPESQK	1611.69	66.4386	-1	-1
Lowdose_2rad_IMAC_MSA1	7042	1	2	3.7096	592.9	0.243234	0.493188	5.21834	0.000294	AGDLLEDS*PKRPK	-1	-1	-1	-1
Lowdose_2rad_IMAC_MSA1	4582	1	3	3.7092	784.4	0.225493	0.474861	5.30109	0.000331	GGTPAGSARGS*PTRPNPPVR	382.421	24.121	-1	-1
Lowdose_2rad_IMAC_MSA1	8928	1	2	3.7087	484.1	0.290479	0.538961	5.99708	0.000116	SPSLSPSPPS*PLEK	1602.69	55.3598	-1	-1
Lowdose_2rad_IMAC_MSA1	5510	1	2	3.7086	174.8	0.328938	0.573531	6.80027	0.000158	SGS*GGGSAKEPQEER	1482.99	28.879	-1	-1
Lowdose_2rad_IMAC_MSA1	5627	1	2	3.7066	535.9	0.221874	0.471035	7.24676	0.000534	RSS*LLNAK	1611.42	50.5889	-1	-1
Lowdose_2rad_IMAC_MSA1	3705	1	3	3.7056	437.1	0.480975	0.693524	6.08631	1e-06	SKVGST*ENIKHQPGGGR	1219.23	40.807	-1	-1
Lowdose_2rad_IMAC_MSA1	14848	1	2	3.7048	472	0.252942	0.502933	4.41978	0.000294	MPLDLS*PLATPIIR	956.885	88.2612	-1	-1
Lowdose_2rad_IMAC_MSA1	11014	1	2	3.7031	188.2	0.389106	0.623784	4.85106	3.1e-05	HKAAAYDIS*EDEED	1108.76	68.9241	-1	-1
Lowdose_2rad_IMAC_MSA1	14844	1	2	3.7016	739.5	0.324805	0.569917	5.61675	2.2e-05	SLTSS*LENIFSR	2174.94	0	-1	-1
Lowdose_2rad_IMAC_MSA1	6161	1	3	3.701	490.6	0.330613	0.57499	4.71261	4.8e-05	ATAPQTQHVS*PMRQVEPPAK	1255.67	42.0983	-1	-1
Lowdose_2rad_IMAC_MSA1	13827	1	2	3.7007	572.7	0.379009	0.615637	3.71159	8e-06	SYS*SPDITQAIQEEEK	1422.65	0	-1	-1
Lowdose_2rad_IMAC_MSA1	6106	1	2	3.7001	297	0.33645	0.580043	0.91563	6.1e-05	ASPS*PQPSSQPLQIHR	1996.29	115.473	-1	-1
Lowdose_2rad_IMAC_MSA1	8650	1	3	3.6974	296.9	0.429329	0.655232	3.9019	1.2e-05	ERS*PS*PLRGNVVPS*PLPTR	851.582	123.709	123.709	0
Lowdose_2rad_IMAC_MSA1	13681	1	2	3.6963	202.8	0.428672	0.65473	-1.30557	1.1e-05	S*IEDLQPPSALSAPFTNSLAR	828.45	80.7157	-1	-1
Lowdose_2rad_IMAC_MSA1	3193	1	3	3.6919	441.7	0.476963	0.690625	5.67733	1e-06	NTPSQHSHSIQHS*PER	908.815	99.52	-1	-1
Lowdose_2rad_IMAC_MSA1	11530	1	2	3.6907	983.7	0.333216	0.577249	4.71023	1.1e-05	SLS*MVDLQDAR	2047	25.4036	-1	-1
Lowdose_2rad_IMAC_MSA1	2874	1	2	3.6868	545.8	0.387219	0.622269	3.68008	8e-06	TRHSPTPQQS*NR	741.183	83.2567	-1	-1
Lowdose_2rad_IMAC_MSA1	10767	1	3	3.6866	566.9	0.373759	0.611358	6.13032	1.2e-05	LKDLFDYS*PPLHK	1071.14	92.8771	-1	-1
Lowdose_2rad_IMAC_MSA1	11137	1	2	3.6864	188.1	0.32761	0.572372	-0.151028	0.000158	EGEEPTVYS*DEEEPKDESAR	1358.72	33.5845	-1	-1
Lowdose_2rad_IMAC_MSA1	11387	1	3	3.6857	527.9	0.271699	0.521248	4.48511	0.000243	SKYDEIFYNLAPADGKLS*GSK	1003.38	27.3069	-1	-1
Lowdose_2rad_IMAC_MSA1	12059	1	2	3.6856	370.1	0.466952	0.683339	-0.434966	2e-06	KSLDS*DES*EDEEDDYQQK	1559.99	0	66.9931	-1
Lowdose_2rad_IMAC_MSA1	10279	1	2	3.6832	457.9	0.179029	0.423118	4.58168	0.002186	DIIRQPS*EEEIIK	-1	-1	-1	-1
Lowdose_2rad_IMAC_MSA1	4971	1	2	3.6805	342.4	0.274365	0.523799	4.65834	0.000294	GPAGEAGAS*PPVRR	-1	-1	-1	-1
Lowdose_2rad_IMAC_MSA1	14632	1	2	3.679	516.3	0.498886	0.706319	3.52122	0	AS*LGSLEGEAEAEASSPK	662.32	25.6136	-1	-1
Lowdose_2rad_IMAC_MSA1	12644	1	3	3.6775	665.8	0.315894	0.562044	4.94884	3.5e-05	SCNRMSS*HTETSSFLQTLTGR	1137.03	23.9593	-1	-1
Lowdose_2rad_IMAC_MSA1	13737	1	2	3.677	247.7	0.434539	0.659196	4.68251	8e-06	KCS*LPAEEDSVLEK	1110.89	171.978	-1	-1
Lowdose_2rad_IMAC_MSA1	11639	1	4	3.6761	416.4	0.264003	0.513812	4.48795	9.4e-05	VVGKPAQLGTQRS*QEADVQDWEFR	984.883	0	-1	-1
Lowdose_2rad_IMAC_MSA1	7808	1	2	3.6752	191.6	0.308691	0.5556	4.62226	0.000216	LGSLSARS*DSEATISR	768.43	27.3069	-1	-1
Lowdose_2rad_IMAC_MSA1	14664	1	2	3.6722	519.1	0.325663	0.570669	5.75532	4.4e-05	VDS*TTCLFPVEEK	1850.83	56.4386	-1	-1
Lowdose_2rad_IMAC_MSA1	10286	1	3	3.6709	404.4	0.235092	0.484863	5.26777	0.001084	SAST*EKLEQGTSALIR	1343.97	0	-1	-1
Lowdose_2rad_IMAC_MSA1	14530	1	2	3.669	705.2	0.385173	0.620623	1.09585	6e-06	MPQDGS*DDEDEEWPTLEK	1876.47	239.163	-1	-1
Lowdose_2rad_IMAC_MSA1	15436	1	3	3.6679	219.5	0.283841	0.532767	5.84847	0.001084	PEEETTNAVES*NNRVY*QT*PK	307.945	0	6.4475	12.2023
Lowdose_2rad_IMAC_MSA1	4518	1	2	3.6651	440.9	0.323265	0.568564	6.67438	6.1e-05	TVART*PLGQR	1404.86	32.5041	-1	-1
Lowdose_2rad_IMAC_MSA1	11124	1	2	3.6643	141.7	0.298038	0.545929	3.64209	0.000534	GPRIS*APNVDFNLEGPK	-1	-1	-1	-1
Lowdose_2rad_IMAC_MSA1	12573	1	2	3.6612	51.1	0.553999	0.744311	2.1021	6e-06	RVS*VCAET*YNPDEEEEDTDPR	862.222	40.4711	45.9378	-1
Lowdose_2rad_IMAC_MSA1	8618	1	2	3.6593	481.8	0.197196	0.444068	5.36931	0.001263	NTSAEKELSS*PIS*PK	1669.61	76.73	58.1708	-1
Lowdose_2rad_IMAC_MSA1	8194	1	2	3.6592	813.4	0.434713	0.659328	4.72846	1e-06	SLY*ASSPGGVYATR	1514.36	40.807	-1	-1
Lowdose_2rad_IMAC_MSA1	3533	1	2	3.6565	284.1	0.193136	0.439472	6.47068	0.002853	RRS*PS*LSSK	765.599	73.1182	0	-1
Lowdose_2rad_IMAC_MSA1	6167	1	2	3.6562	545.3	0.448827	0.669946	6.94249	1e-06	AELAHS*PLPAK	-1	-1	-1	-1
Lowdose_2rad_IMAC_MSA1	14461	1	4	3.6553	299.4	0.351462	0.592842	3.99412	9e-06	VPPPRS*PQAQEAPVNIDEGLTGCTIQLLPAQDK	1296.1	19.0307	-1	-1
Lowdose_2rad_IMAC_MSA1	5470	1	3	3.6528	742.6	0.398407	0.631195	6.96503	3e-06	AEVLGHKT*PEPAPR	-1	-1	-1	-1
Lowdose_2rad_IMAC_MSA1	10409	1	2	3.6508	26.9	0.461926	0.679651	1.0187	0.000116	KS*PRPAGPQLFLPDPDPQR	-1	-1	-1	-1
Lowdose_2rad_IMAC_MSA1	9389	1	2	3.6505	461.8	0.185975	0.431248	5.9228	0.002186	RLS*QSDEDVIR	621.691	48.6032	-1	-1
Lowdose_2rad_IMAC_MSA1	4653	1	2	3.6499	348.4	0.373791	0.611384	4.27301	2.2e-05	GAKEEHGGLIRS*PR	-1	-1	-1	-1
Lowdose_2rad_IMAC_MSA1	6321	1	2	3.6471	217.2	0.312413	0.558939	5.13836	0.000216	AEDGATPSPSNET*PK	2290.68	0	-1	-1
Lowdose_2rad_IMAC_MSA1	8336	1	2	3.6467	483.9	0.262895	0.512733	4.19825	0.000216	VEQMPQAS*PGLAPR	-1	-1	-1	-1
Lowdose_2rad_IMAC_MSA1	10806	1	2	3.645	393.7	0.43487	0.659447	-2.79061	4e-06	KLEKEEEEGISQES*S*EEEQ	2051.44	147.623	101.67	-1
Lowdose_2rad_IMAC_MSA1	7114	1	2	3.6444	448.4	0.492372	0.701692	5.02146	1e-06	DSSFTEVPRS*PK	1649.76	164.373	-1	-1
Lowdose_2rad_IMAC_MSA1	8030	1	2	3.6432	358.5	0.498326	0.705922	3.80411	1e-06	T*ASNPKVENEDEPVR	1652.16	0	-1	-1
Lowdose_2rad_IMAC_MSA1	7172	1	3	3.6421	280.4	0.317152	0.563162	5.89296	0.000331	TPSPKEEDEEPES*PPEKK	679.742	95.4826	-1	-1
Lowdose_2rad_IMAC_MSA1	11734	1	3	3.642	212.3	0.417792	0.646368	1.61699	4.8e-05	TQTPPVSPAPQPTEERLPS*SPVYEDAASFK	1232.94	0	-1	-1
Lowdose_2rad_IMAC_MSA1	8523	1	3	3.6405	207.4	0.308144	0.555107	2.41697	0.000812	RKELEEVS*PETPVVPATTQR	1463.96	124.705	-1	-1
Lowdose_2rad_IMAC_MSA1	9474	1	2	3.6392	341.7	0.394262	0.627903	5.87922	1.1e-05	KDS*LTQAQEQGNLLN	2009.8	50.7334	-1	-1
Lowdose_2rad_IMAC_MSA1	5425	1	2	3.6362	277.4	0.426599	0.653145	-2.25665	8e-06	TNPPTQKPPS*PPMSGR	1578.23	89.8058	-1	-1
Lowdose_2rad_IMAC_MSA1	7044	1	2	3.6327	663.9	0.337215	0.580702	6.05464	2.2e-05	NKAGT*PVSELTK	1379.24	94.1937	-1	-1
Lowdose_2rad_IMAC_MSA1	5747	1	2	3.6322	307.5	0.454243	0.673976	4.34897	4e-06	HSS*ETFSSTPSATR	1718.48	0	-1	-1
Lowdose_2rad_IMAC_MSA1	12719	1	3	3.6312	110.7	0.310614	0.557328	5.80925	0.002505	MIEVLT*T*TDSQKLLHQLNALLEQES*R	553.986	16.7001	0	99.6412
Lowdose_2rad_IMAC_MSA1	14853	1	3	3.6311	180.6	0.407094	0.638039	0.348735	9.4e-05	EVQTPQYLNPFDEPEAFVTIKDS*PPQSTK	871.557	0	-1	-1
Lowdose_2rad_IMAC_MSA1	6239	1	2	3.6303	307.6	0.171501	0.414127	5.10398	0.00478	LELQGPRGS*PNAR	-1	-1	-1	-1
Lowdose_2rad_IMAC_MSA1	12826	1	3	3.6291	539.8	0.368218	0.60681	5.19297	1.7e-05	ESAS*PTIPNLDLLEAHTK	1273.49	36.8721	-1	-1
Lowdose_2rad_IMAC_MSA1	7177	1	3	3.6287	265.3	0.253397	0.503386	4.26271	0.001905	TPSPKEEDEEPES*PPEKK	692.392	95.4826	-1	-1
Lowdose_2rad_IMAC_MSA1	6146	1	2	3.6271	942.9	0.547683	0.740056	5.59218	0	SHS*SSEAYEPR	1819.59	56.4386	-1	-1
Lowdose_2rad_IMAC_MSA1	7049	1	2	3.6226	1121.4	0.171507	0.414134	5.37201	0.001263	AGDLLEDS*PKRPK	-1	-1	-1	-1
Lowdose_2rad_IMAC_MSA1	8193	1	2	3.6223	257.3	0.257295	0.507243	4.37023	0.000715	SSGHSSS*ELSPDAVEK	1636.09	25.8184	-1	-1
Lowdose_2rad_IMAC_MSA1	4137	1	2	3.6217	797.9	0.456167	0.675401	5.6255	1e-06	HVDSLS*QRSPK	2290.98	107.22	-1	-1
Lowdose_2rad_IMAC_MSA1	6125	1	2	3.6188	662.6	0.263568	0.513389	4.99042	0.000158	DLVQPDKPAS*PK	-1	-1	-1	-1
Lowdose_2rad_IMAC_MSA1	3264	1	2	3.6187	621.9	0.335618	0.579325	6.7431	2.2e-05	KVVVS*PTKK	1573.85	18.1803	-1	-1
Lowdose_2rad_IMAC_MSA1	6460	1	3	3.618	423.6	0.291404	0.539818	4.81813	0.000243	SQGDEAGGHGEDRPEPLS*PK	636.145	88.344	-1	-1
Lowdose_2rad_IMAC_MSA1	4660	1	2	3.6151	694.9	0.513706	0.716733	4.87864	0	VSAGEPGSHPS*PAPR	1476.71	86.6238	-1	-1
Lowdose_2rad_IMAC_MSA1	11429	1	2	3.6135	232.3	0.490383	0.700274	2.29457	3e-06	DPGS*PGPFDYVGAPPAESIPQK	1874.21	111.778	-1	-1
Lowdose_2rad_IMAC_MSA1	4926	1	2	3.6103	529.2	0.237958	0.487809	7.78003	0.000397	KETQS*PEQVK	1564.4	25.6136	-1	-1
Lowdose_2rad_IMAC_MSA1	14761	1	3	3.6098	346.6	0.232755	0.482447	6.60487	0.001905	S*SKASLGS*LEGEAEAEASSPK	1303.57	0	17.2899	-1
Lowdose_2rad_IMAC_MSA1	7617	1	3	3.6088	599.4	0.388661	0.623427	7.19335	6e-06	ISSKS*PGHMVILDQTK	824.846	24.3056	-1	-1
Lowdose_2rad_IMAC_MSA1	14523	1	2	3.6071	632	0.430318	0.655986	4.55958	2e-06	MPQDGS*DDEDEEWPTLEK	1538.12	236.078	-1	-1
Lowdose_2rad_IMAC_MSA1	10056	1	2	3.604	135	0.393979	0.627677	2.01317	6.1e-05	DALGDSLQVPVS*PSSTTSSR	2096.31	107.22	-1	-1
Lowdose_2rad_IMAC_MSA1	9573	1	2	3.6033	249.4	0.288652	0.537263	-28.5006	0.000294	QDPLHS*PT*SKRK	708.565	19.1644	0	-1
Lowdose_2rad_IMAC_MSA1	13370	1	3	3.6026	475.9	0.286321	0.53509	6.34382	0.000178	GGREGFES*DTDSEFTFK	1295.05	48.6032	-1	-1
Lowdose_2rad_IMAC_MSA1	14913	1	4	3.5998	197.9	0.426079	0.652747	4.93875	2e-06	SKGHYEVTGS*DDETGKLQGSGVSLASK	1181.02	0	-1	-1
Lowdose_2rad_IMAC_MSA1	8254	1	2	3.5994	432.5	0.306968	0.554047	5.09165	8.4e-05	SST*PLPTISSSAENTR	1294.99	0	-1	-1
Lowdose_2rad_IMAC_MSA1	3622	1	2	3.599	497	0.23062	0.480229	5.74125	0.000534	RDS*QGTYSSR	992.547	94.1937	-1	-1
Lowdose_2rad_IMAC_MSA1	3523	1	2	3.5978	358.7	0.217883	0.466779	6.04836	0.001263	S*SPEQPRPSTSK	461.961	0	-1	-1
Lowdose_2rad_IMAC_MSA1	6010	1	2	3.5975	111	0.359222	0.599351	1.395	0.000158	RRS*QS*IEQESQEK	1581.36	123.093	123.093	-1
Lowdose_2rad_IMAC_MSA1	12874	1	3	3.5962	298	0.467938	0.68406	0.127293	6e-06	T*QTPPVS*PAPQPTEERLPSSPVYEDAASFK	523.318	0	32.7278	-1
Lowdose_2rad_IMAC_MSA1	15193	1	2	3.5954	914.4	0.428075	0.654274	4.84037	1e-06	SSLS*GDEEDELFK	1090.78	0	-1	-1
Lowdose_2rad_IMAC_MSA1	4751	1	4	3.5951	405.1	0.175266	0.418648	5.69234	0.002679	APPQTHLPSGASSGTGSASATHGGGS*PPGTR	950.815	18.6518	-1	-1
Lowdose_2rad_IMAC_MSA1	5446	1	2	3.595	649.3	0.398609	0.631355	2.21755	4e-06	VQEKPDS*PGGSTQIQR	1999.25	112.33	-1	-1
Lowdose_2rad_IMAC_MSA1	8209	1	2	3.5935	413.1	0.290664	0.539133	5.07625	0.000158	RDS*LTGSSDLYK	700.242	45.407	-1	-1
Lowdose_2rad_IMAC_MSA1	12819	1	3	3.5935	303.6	0.41742	0.64608	5.45743	1.7e-05	TES*PATAAETASEELDNR	1751.82	15.0222	-1	-1
Lowdose_2rad_IMAC_MSA1	5890	1	2	3.5932	695	0.326088	0.571041	3.61849	3.1e-05	S*REDLSAQPVQTK	1078.45	135.867	-1	-1
Lowdose_2rad_IMAC_MSA1	12639	1	3	3.593	618.7	0.33543	0.579163	4.42662	2.5e-05	SCNRMS*SHTETSSFLQTLTGR	1709.54	25.6136	-1	-1
Lowdose_2rad_IMAC_MSA1	9120	1	3	3.5914	125.4	0.310798	0.557493	9.09988	0.001905	TGKEYIPGQPPLSQSSDSS*PTRNSEPAGLETPEAK	1170.18	25.8184	-1	-1
Lowdose_2rad_IMAC_MSA1	4052	1	2	3.5896	604.3	0.374136	0.611667	6.12341	8e-06	RPPS*PEPSTK	1460.55	117.43	-1	-1
Lowdose_2rad_IMAC_MSA1	8049	1	2	3.5884	178.6	0.362223	0.60185	4.84036	8.4e-05	ETERAS*PIKMDLAPSK	1206.68	38.9152	-1	-1
Lowdose_2rad_IMAC_MSA1	4739	1	3	3.5873	375.5	0.238508	0.488373	7.31752	0.001441	KKEEPSQNDIS*PK	291.816	69.1418	-1	-1
Lowdose_2rad_IMAC_MSA1	9250	1	2	3.5871	375.3	0.262217	0.512071	3.81675	0.000397	TTRT*PEEGGYSYDISEK	2357.22	25.6136	-1	-1
Lowdose_2rad_IMAC_MSA1	14718	1	2	3.5869	932	0.494828	0.70344	5.35111	0	S*IEVENDFLPVEK	-1	-1	-1	-1
Lowdose_2rad_IMAC_MSA1	9399	1	3	3.584	305.6	0.267355	0.517064	-1.21393	0.000812	VKPPPS*PTTEGPSLQPDLAPEEAAGTQRPK	1017.97	46.6551	-1	-1
Lowdose_2rad_IMAC_MSA1	12063	1	2	3.5837	517.8	0.485615	0.696861	2.14637	1e-06	KSLDS*DES*EDEEDDYQQK	1013.29	0	54.8418	-1
Lowdose_2rad_IMAC_MSA1	10385	1	2	3.583	1236.4	0.523584	0.723591	2.70871	0	VPS*S*DEEVVEEPQSR	1996.08	364.349	374.962	-1
Lowdose_2rad_IMAC_MSA1	8184	1	2	3.5827	882.1	0.445	0.667083	5.36448	1e-06	KRET*DDEGEDD	-1	-1	-1	-1
Lowdose_2rad_IMAC_MSA1	4432	1	3	3.5819	309.6	0.314107	0.560452	6.12071	0.000243	RPAEATSSPT*SPERPR	1165.78	36.73	-1	-1
Lowdose_2rad_IMAC_MSA1	14537	1	2	3.5818	342.7	0.406751	0.63777	2.18241	1.1e-05	VDS*TTCLFPVEEK	1508.64	0	-1	-1
Lowdose_2rad_IMAC_MSA1	9615	1	2	3.5815	311.3	0.279994	0.529145	4.7588	0.000294	S*ASSGAEGDVSSEREP	1435.94	0	-1	-1
Lowdose_2rad_IMAC_MSA1	11609	1	3	3.5811	232.9	0.283014	0.531991	3.73971	0.001084	S*LGEQDQMTLRPPEKVDLEPLK	1309.13	127.024	-1	-1
Lowdose_2rad_IMAC_MSA1	12746	1	2	3.5798	774.8	0.296413	0.544438	7.50741	6.1e-05	SGLS*LEELR	1533.42	35.1743	-1	-1
Lowdose_2rad_IMAC_MSA1	13608	1	3	3.5798	66.3	0.329627	0.574132	1.9171	0.004262	ETAVPGPLGIEDISPNLS*PDDKSFSR	1350.78	20.6028	-1	-1
Lowdose_2rad_IMAC_MSA1	14543	1	2	3.5791	821	0.46928	0.68504	5.15048	1e-06	VDS*TTCLFPVEEK	2096.59	40.5889	-1	-1
Lowdose_2rad_IMAC_MSA1	12446	1	2	3.5767	118.4	0.416222	0.645153	5.33181	4.4e-05	SFGTRPLS*SGFSPEEAQQQDEEFEK	1181.02	0	-1	-1
Lowdose_2rad_IMAC_MSA1	12996	1	3	3.5759	259.8	0.263906	0.513718	2.10451	0.001441	HSTY*KYGRPDEIIEER	317.179	19.888	-1	-1
Lowdose_2rad_IMAC_MSA1	12198	1	2	3.5748	222.3	0.312129	0.558685	5.13616	0.000216	GSPVSEIGWETPPPES*PR	1769.05	69.839	-1	-1
Lowdose_2rad_IMAC_MSA1	10685	1	2	3.5742	257.8	0.26862	0.518286	5.19252	0.000534	GSLAS*LDS*LRK	735.01	85.6197	101.324	-1
Lowdose_2rad_IMAC_MSA1	7066	1	2	3.5739	433.4	0.459442	0.677822	4.79262	2e-06	CDSSPDS*AEDVRK	1160.81	40.9413	-1	-1
Lowdose_2rad_IMAC_MSA1	8161	1	3	3.5736	352.9	0.232567	0.482252	5.64872	0.001905	TEMDKS*PFNSPS*PQDSPR	984.567	69.9773	42.0128	-1
Lowdose_2rad_IMAC_MSA1	12922	1	3	3.5718	204.9	0.333585	0.577568	5.92803	0.000448	SGSS*SPDSEITELKFPSINHD	997.219	0	-1	-1
Lowdose_2rad_IMAC_MSA1	7902	1	2	3.5709	286.7	0.396343	0.629558	-0.290937	1.6e-05	KGAGDGS*DEEVDGKADGAEAKPAE	-1	-1	-1	-1
Lowdose_2rad_IMAC_MSA1	4222	1	3	3.5687	372.4	0.37459	0.612038	4.43283	3.5e-05	THTTALAGRS*PS*PASGR	869.608	10.1829	0	-1
Lowdose_2rad_IMAC_MSA1	5899	1	2	3.568	706.2	0.321132	0.566685	5.01022	3.1e-05	S*REDLSAQPVQTK	1036.96	128.306	-1	-1
Lowdose_2rad_IMAC_MSA1	9070	1	4	3.5642	387.8	0.385164	0.620616	0.395305	2e-06	TGKEYIPGQPPLSQSSDS*SPTRNSEPAGLETPEAK	1300.38	0	-1	-1
Lowdose_2rad_IMAC_MSA1	12337	1	3	3.5639	386.6	0.377003	0.614006	4.26202	3.5e-05	TITLVKS*PISVPGGSALISNLGK	1457.29	60.8817	-1	-1
Lowdose_2rad_IMAC_MSA1	6902	1	4	3.563	241	0.189896	0.435771	5.49546	0.003594	TIDLGAAAHYTGDKASPDQNAS*THTPQSSVK	865.13	0	-1	-1
Lowdose_2rad_IMAC_MSA1	13874	1	2	3.5627	339.5	0.317933	0.563855	4.488	8.4e-05	ASLGS*LEGEAEAEASS*PKGK	1764.57	0	0	-1
Lowdose_2rad_IMAC_MSA1	6152	1	2	3.562	1093.9	0.575379	0.758537	5.86195	0	SHS*SSEAYEPR	2020.96	40.5889	-1	-1
Lowdose_2rad_IMAC_MSA1	12312	1	2	3.562	258.9	0.443066	0.665632	4.89421	6e-06	ASS*LGEIDESSELR	1535.96	0	-1	-1
Lowdose_2rad_IMAC_MSA1	10417	1	3	3.5605	218.9	0.268445	0.518117	3.71389	0.001905	VEMYS*GS*DDDDDFNKLPKK	1526.07	29.2276	29.2276	-1
Lowdose_2rad_IMAC_MSA1	9637	3	4	3.5605	514.9	0.261592	0.511461	5.99637	6.4e-05	LSSESHHGGS*PIHWVLPAGMSAK	716.802	21.1418	-1	-1
Lowdose_2rad_IMAC_MSA1	6428	1	2	3.56	260.1	0.424888	0.651834	2.98773	1.1e-05	GYT*SDSEVYTDHGRPGK	1689.71	0	-1	-1
Lowdose_2rad_IMAC_MSA1	13187	1	2	3.559	665.5	0.344029	0.58654	3.64828	1.6e-05	ATNES*EDEIPQLVPIGK	1502.88	0	-1	-1
Lowdose_2rad_IMAC_MSA1	9780	1	3	3.5565	318.5	0.286827	0.535562	6.04203	0.000448	SASQSS*LDKLDQELKEQQK	1254.85	0	-1	-1
Lowdose_2rad_IMAC_MSA1	13832	1	2	3.5543	449.8	0.307205	0.554261	7.35736	8.4e-05	SYS*SPDITQAIQEEEK	879.187	0	-1	-1
Lowdose_2rad_IMAC_MSA1	11170	1	3	3.5529	366.9	0.460976	0.678952	5.63245	4e-06	KLEKEEEEGISQES*S*EEEQ	1474.42	25.8855	25.8855	-1
Lowdose_2rad_IMAC_MSA1	13508	1	3	3.5512	247.7	0.49862	0.70613	4.00173	4e-06	RRGS*SGSVDETLFALPAASEPVIR	1795.46	0	-1	-1
Lowdose_2rad_IMAC_MSA1	14152	1	2	3.5494	432.9	0.296388	0.544415	4.74642	0.000116	SSLS*GDEEDELFKGATLK	1059.21	0	-1	-1
Lowdose_2rad_IMAC_MSA1	12182	1	2	3.549	544	0.345675	0.587941	-1.82523	2.2e-05	KSLDS*DES*EDEEDDYQQK	1139.41	0	88.2612	-1
Lowdose_2rad_IMAC_MSA1	9310	1	2	3.5483	702.6	0.283629	0.532568	4.6785	8.4e-05	TLS*DESIYNSQR	1456.47	56.5109	-1	-1
Lowdose_2rad_IMAC_MSA1	5133	1	2	3.5453	381.6	0.320932	0.566509	6.8525	8.4e-05	ATAPQTQHVS*PMR	1098.98	97.6381	-1	-1
Lowdose_2rad_IMAC_MSA1	10400	1	3	3.5452	340.9	0.413601	0.643118	6.31774	1.7e-05	KS*PRPAGPQLFLPDPDPQR	-1	-1	-1	-1
Lowdose_2rad_IMAC_MSA1	7232	1	3	3.5451	421.4	0.332656	0.576763	5.26846	6.7e-05	SLGNILQAKPTS*SPAKGPPQK	1246.1	36.73	-1	-1
Lowdose_2rad_IMAC_MSA1	11630	1	2	3.54	549	0.389492	0.624093	4.42197	8e-06	LPSS*PVYEDAASFK	1461.08	33.2193	-1	-1
Lowdose_2rad_IMAC_MSA1	14119	1	2	3.5368	490.8	0.276408	0.525745	5.43532	0.000158	TLMLPLTEGS*LR	1164.94	63.1255	-1	-1
Lowdose_2rad_IMAC_MSA1	8540	1	2	3.5354	393.7	0.287011	0.535734	4.03652	0.000158	AMADELS*EKQVYDAHTK	1183.3	127.311	-1	-1
Lowdose_2rad_IMAC_MSA1	8173	1	2	3.5343	137.3	0.225618	0.474993	4.87411	0.003703	KVELS*ES*EEDKGGK	-1	-1	-1	-1
Lowdose_2rad_IMAC_MSA1	12602	1	2	3.5334	331	0.222647	0.471855	2.51424	0.001263	SPS*LGSDLTFATR	1572.33	23.9593	-1	-1
Lowdose_2rad_IMAC_MSA1	3290	1	2	3.5312	816.9	0.327424	0.57221	6.54076	2.2e-05	RPS*QGPPAR	-1	-1	-1	-1
Lowdose_2rad_IMAC_MSA1	5780	1	2	3.5309	188	0.247416	0.497409	5.29487	0.001263	SES*PKEPEQLRK	1099.52	31.0284	-1	-1
Lowdose_2rad_IMAC_MSA1	4045	1	2	3.5292	954.1	0.397342	0.630351	6.53053	3e-06	RPPS*PEPSTK	1827.29	135.867	-1	-1
Lowdose_2rad_IMAC_MSA1	11037	1	3	3.5281	418.9	0.400471	0.632828	4.9821	1.2e-05	KLEKEEEEGISQES*S*EEEQ	1244.65	12.2767	12.2767	-1
Lowdose_2rad_IMAC_MSA1	8530	1	2	3.527	154.1	0.212872	0.461381	6.98474	0.003703	EGNTTEDDFPSS*PGNGNK	1808.34	92.8771	-1	-1
Lowdose_2rad_IMAC_MSA1	6536	1	2	3.5262	118.3	0.398162	0.631001	4.5629	6.1e-05	APS*RQDVYGPQPQVR	1151.75	166.128	-1	-1
Lowdose_2rad_IMAC_MSA1	7625	1	3	3.5262	55.5	0.442459	0.665176	3.71732	0.000605	APS*PAPSSVPLGSEKPSNVSQDR	891.028	87.9099	-1	-1
Lowdose_2rad_IMAC_MSA1	7810	1	3	3.5242	419.4	0.289711	0.538248	6.52422	0.000243	LGSLSARSDS*EATISR	861.614	23.2721	-1	-1
Lowdose_2rad_IMAC_MSA1	4477	1	2	3.5234	331.1	0.354345	0.595269	5.28502	4.4e-05	T*SPAKQQAPPVR	1489.01	0	-1	-1
Lowdose_2rad_IMAC_MSA1	5621	1	2	3.5222	633.5	0.205979	0.453849	7.49103	0.000953	RSS*LLNAK	1251.4	56.4386	-1	-1
Lowdose_2rad_IMAC_MSA1	11136	1	2	3.5218	1577.4	0.3624	0.601997	7.4243	3e-06	GEFSAS*PMLK	2187.11	55.4363	-1	-1
Lowdose_2rad_IMAC_MSA1	12068	1	4	3.5203	256.1	0.413345	0.642919	4.71314	2e-06	AKTQT*PPVS*PAPQPTEERLPSSPVYEDAASFK	1548.37	0	8.556	-1
Lowdose_2rad_IMAC_MSA1	7855	1	2	3.5199	543.3	0.396972	0.630057	6.67351	8e-06	GAGDGS*DEEVDGK	-1	-1	-1	-1
Lowdose_2rad_IMAC_MSA1	4954	1	4	3.5181	705.4	0.552912	0.743581	4.91809	0	AHT*PTPGIYMGRPTHSGGGGGGGGGGGGGGGGR	2345.01	46.6551	-1	-1
Lowdose_2rad_IMAC_MSA1	3830	1	2	3.5178	876.3	0.5394	0.734439	4.48595	0	HRPS*PPAT*PPPK	-1	-1	-1	-1
Lowdose_2rad_IMAC_MSA1	4033	1	3	3.5129	609.9	0.169774	0.412036	6.48735	0.003276	IRS*SVEKENQK	520.429	0	-1	-1
Lowdose_2rad_IMAC_MSA1	14753	1	2	3.5124	253	0.478903	0.692028	5.12756	3e-06	GS*PEEELPLPAFEK	-1	-1	-1	-1
Lowdose_2rad_IMAC_MSA1	7841	1	2	3.5119	136.5	0.284575	0.533456	4.0285	0.000715	SKT*PTGPELDTSYK	1114.87	47.851	-1	-1
Lowdose_2rad_IMAC_MSA1	14842	1	2	3.5094	491.4	0.355616	0.596335	3.38019	2.2e-05	MPLDLS*PLATPIIR	1091.16	95.3297	-1	-1
Lowdose_2rad_IMAC_MSA1	3711	1	3	3.5089	639	0.426401	0.652994	6.38202	2e-06	SKVGS*TENIKHQPGGGR	1364.29	31.0284	-1	-1
Lowdose_2rad_IMAC_MSA1	12043	1	3	3.508	274.3	0.284977	0.533832	4.5121	0.000812	QGAIYHGLATLLNQPS*PMMQR	1257.77	225.103	-1	-1
Lowdose_2rad_IMAC_MSA1	6548	1	2	3.5073	318.5	0.293445	0.541706	5.42681	0.000216	HVAYGGY*STPEDR	1765.89	0	-1	-1
Lowdose_2rad_IMAC_MSA1	4949	1	4	3.5071	752.2	0.448661	0.669822	5.59741	0	AHT*PTPGIYMGRPTHSGGGGGGGGGGGGGGGGR	2473.65	0	-1	-1
Lowdose_2rad_IMAC_MSA1	9884	1	3	3.5057	143.2	0.44014	0.66343	6.24957	6.7e-05	QQSHFAMMHGGTGFAGIDSSS*PEVK	855.057	0	-1	-1
Lowdose_2rad_IMAC_MSA1	8869	1	2	3.5056	266.9	0.198226	0.445226	5.57413	0.002853	CGS*SEDLHDSVR	728.638	46.4386	-1	-1
Lowdose_2rad_IMAC_MSA1	11556	1	3	3.5045	347.2	0.200314	0.447565	1.89408	0.004262	KQDDS*PPRPIIGPALPPGFIK	-1	-1	-1	-1
Lowdose_2rad_IMAC_MSA1	12221	1	2	3.5036	621.5	0.510132	0.714235	4.76959	0	IS*APNVDFNLEGPK	-1	-1	-1	-1
Lowdose_2rad_IMAC_MSA1	9079	1	2	3.5035	443	0.236078	0.485879	3.2669	0.000715	VGS*LDNVGHLPAGGAVK	-1	-1	-1	-1
Lowdose_2rad_IMAC_MSA1	4976	1	2	3.503	348.2	0.357693	0.598074	5.3438	3.1e-05	GPAGEAGAS*PPVRR	-1	-1	-1	-1
Lowdose_2rad_IMAC_MSA1	10928	1	3	3.5028	385.4	0.349349	0.591058	7.02771	6.7e-05	SAS*VNKEPVSLPGIMR	1769.55	27.3069	-1	-1
Lowdose_2rad_IMAC_MSA1	14967	1	3	3.5025	739.4	0.266296	0.516039	5.21641	0.000129	KET*ES*EAEDNLDDLEK	-1	-1	-1	-1
Lowdose_2rad_IMAC_MSA1	14818	1	3	3.5018	245.5	0.427409	0.653765	5.00435	2.5e-05	MLGQKAT*PPPSPLLSELLK	2119.04	158.002	-1	-1
Lowdose_2rad_IMAC_MSA1	9879	1	4	3.5017	424.8	0.241625	0.491554	5.02531	0.000195	QQSHFAMMHGGTGFAGIDSSS*PEVK	1193.21	28.879	-1	-1
Lowdose_2rad_IMAC_MSA1	5395	1	2	3.5009	538.8	0.250307	0.500307	6.72525	0.000294	VGGS*SVDLHR	1357.4	56.5109	-1	-1
Lowdose_2rad_IMAC_MSA1	7759	1	3	3.499	157.9	0.293484	0.541742	4.42922	0.001905	TGKEYIPGQPPLSQSS*DSSPTR	1538.06	46.6551	-1	-1
Lowdose_2rad_IMAC_MSA1	4601	1	2	3.4981	186.6	0.225923	0.475314	4.42258	0.002186	RRS*PS*PYYSR	1409.53	155.501	67.806	-1
Lowdose_2rad_IMAC_MSA1	13679	1	2	3.4967	145.4	0.334944	0.578743	1.58022	0.000216	S*NSISQIPSLEEMQQLR	1215.69	0	-1	-1
Lowdose_2rad_IMAC_MSA1	6568	1	3	3.4967	787	0.354334	0.59526	6.56481	9e-06	RTPHVQAVQGPLGS*PPK	2810.16	227.574	-1	-1
Lowdose_2rad_IMAC_MSA1	14637	1	2	3.4965	211.2	0.393679	0.627438	4.10544	3.1e-05	AS*LGSLEGEAEAEASSPK	634.357	25.6136	-1	-1
Lowdose_2rad_IMAC_MSA1	10382	1	2	3.4956	919.4	0.419098	0.647378	-0.354674	2e-06	VAGEAAET*DS*EPEPEPEPTAAPR	1513.12	310.382	217.877	-1
Lowdose_2rad_IMAC_MSA1	7804	1	2	3.495	130.7	0.381173	0.617392	5.22381	8.4e-05	S*LSPNHNTLQTLK	1027.08	0	-1	-1
Lowdose_2rad_IMAC_MSA1	5039	1	2	3.4923	146.9	0.332732	0.576829	6.8768	0.000216	T*PRT*PRTPQLK	627.855	38.3028	38.3028	-1
Lowdose_2rad_IMAC_MSA1	8657	1	3	3.4916	273	0.283767	0.532698	4.52197	0.000812	GLAEVQQDGEAEEGATS*DGEKKR	1108.83	35.1743	-1	-1
Lowdose_2rad_IMAC_MSA1	6459	1	4	3.4913	809.6	0.325953	0.570923	4.96708	2e-06	HPGAHQGNLASGLHSNAIASPGS*PSLGR	1213.25	15.3994	-1	-1
Lowdose_2rad_IMAC_MSA1	11923	1	4	3.4903	343.8	0.2835	0.532447	2.15984	9.4e-05	DS*SKGEDSAEETEAKPAVVAPAPVVEAVSTPSAAFPSDATAENVK	1226.51	0	-1	-1
Lowdose_2rad_IMAC_MSA1	12239	1	3	3.4898	1355	0.292424	0.540762	7.71185	1.2e-05	KKS*PNELVDDLFK	-1	-1	-1	-1
Lowdose_2rad_IMAC_MSA1	11386	1	4	3.4883	535	0.228765	0.478294	5.00525	0.000195	GSNPLDGRDSPS*AGGPVGQLEPIPIPAPASPGTRPTLK	1399.21	0	-1	-1
Lowdose_2rad_IMAC_MSA1	3897	1	2	3.4871	265.3	0.255026	0.505001	4.87821	0.000715	SRGS*PRYS*PR	1597.35	0	46.5836	-1
Lowdose_2rad_IMAC_MSA1	4490	1	2	3.4866	326.3	0.266506	0.516242	6.51532	0.000397	LDNARQS*AER	-1	-1	-1	-1
Lowdose_2rad_IMAC_MSA1	6482	1	3	3.4853	177	0.421743	0.649417	5.87806	6.7e-05	RYPSSISSS*PQKDLTQAK	1294.4	33.5845	-1	-1
Lowdose_2rad_IMAC_MSA1	12753	1	3	3.4853	245.8	0.251542	0.50154	3.34641	0.002505	VATLNS*EEESDPPTYKDAFPPLPEK	1323.5	94.1937	-1	-1
Lowdose_2rad_IMAC_MSA1	3615	1	2	3.4852	519.8	0.212384	0.460851	5.83615	0.000953	RDS*QGTYSSR	1027.43	26.8638	-1	-1
Lowdose_2rad_IMAC_MSA1	14524	1	2	3.4848	324.3	0.461605	0.679415	5.75993	4e-06	SSS*TSDILEPFTVER	1159.67	0	-1	-1
Lowdose_2rad_IMAC_MSA1	4572	1	3	3.4831	368.6	0.495938	0.704229	4.63094	1e-06	PGPTPSGTNVGS*SGRSPSKAVAAR	795.614	0	-1	-1
Lowdose_2rad_IMAC_MSA1	3013	1	2	3.4813	426	0.325769	0.570762	5.44776	6.1e-05	RAS*PS*PPPKR	-1	-1	-1	-1
Lowdose_2rad_IMAC_MSA1	14295	1	2	3.4795	425.4	0.298118	0.546002	5.76744	0.000116	EQDVVTGVS*PLLFR	2239.7	134.985	-1	-1
Lowdose_2rad_IMAC_MSA1	13687	1	2	3.4779	231.1	0.315363	0.561572	4.42637	0.000216	KS*PNELVDDLFK	-1	-1	-1	-1
Lowdose_2rad_IMAC_MSA1	11739	1	2	3.4774	374.3	0.285242	0.534081	5.40593	0.000216	S*SPNPFITGLTR	1341.17	0	-1	-1
Lowdose_2rad_IMAC_MSA1	5463	1	3	3.4767	892.2	0.282768	0.531759	6.50932	4.8e-05	AEVLGHKT*PEPAPR	-1	-1	-1	-1
Lowdose_2rad_IMAC_MSA1	13724	1	2	3.4764	365.6	0.349269	0.59099	6.34937	4.4e-05	SQSSSLLDMGNMS*ASDLDVADR	1884.59	27.3069	-1	-1
Lowdose_2rad_IMAC_MSA1	6166	1	3	3.4764	449	0.303216	0.550651	5.91816	0.000178	ATAPQTQHVS*PMRQVEPPAK	1365.08	21.4914	-1	-1
Lowdose_2rad_IMAC_MSA1	12961	1	3	3.4756	382.8	0.19073	0.436726	5.38378	0.004262	VEMYS*GS*DDDDDFNKLPK	792.208	46.5836	112.33	-1
Lowdose_2rad_IMAC_MSA1	9461	1	3	3.4744	133.7	0.268507	0.518177	6.17015	0.004262	TSSPRS*PPSSSEIFTPAHEENVR	1210.19	0	-1	-1
Lowdose_2rad_IMAC_MSA1	11142	1	2	3.4731	1372.4	0.338545	0.581846	6.69209	8e-06	GEFSAS*PMLK	2331.25	58.7106	-1	-1
Lowdose_2rad_IMAC_MSA1	8385	1	2	3.472	1073.7	0.19231	0.438532	7.60356	0.000715	RQS*FAVLR	-1	-1	-1	-1
Lowdose_2rad_IMAC_MSA1	11826	1	3	3.4717	236.1	0.342224	0.584999	4.88727	0.000243	TAS*EINFDKLQFEPPLRK	1527.13	36.8721	-1	-1
Lowdose_2rad_IMAC_MSA1	6498	1	3	3.4689	202.1	0.299115	0.546914	4.25654	0.001084	SSSISEEKGDS*DDEKPR	677.467	53.463	-1	-1
Lowdose_2rad_IMAC_MSA1	4540	1	2	3.4678	109	0.22334	0.472589	5.15636	0.00478	GASGGAGGRS*LDSR	736.603	67.806	-1	-1
Lowdose_2rad_IMAC_MSA1	13585	1	4	3.4671	139.2	0.252199	0.502194	-12.7726	0.001981	VTVVDTDVHVVY*DTFVKPDNEIVDYNT*R	607.214	0	15.3994	-1
Lowdose_2rad_IMAC_MSA1	7325	1	2	3.4661	411.6	0.355414	0.596166	4.72482	3.1e-05	SQS*IEQESQEK	891.682	46.5836	-1	-1
Lowdose_2rad_IMAC_MSA1	8327	1	3	3.465	353.6	0.50176	0.70835	6.81352	1e-06	NTSAEKELSSPIS*PK	1457.02	27.4432	-1	-1
Lowdose_2rad_IMAC_MSA1	10816	1	2	3.4624	894.3	0.446424	0.66815	5.10144	1e-06	GFSVVADT*PELQR	1709.19	106.075	-1	-1
Lowdose_2rad_IMAC_MSA1	3107	1	2	3.4618	395.9	0.202814	0.450349	6.42624	0.001666	SRTS*PVSR	1406.71	66.4386	-1	-1
Lowdose_2rad_IMAC_MSA1	10368	1	2	3.4614	354.4	0.330098	0.574542	7.07705	8.4e-05	SLGS*PLLHER	1796.76	28.097	-1	-1
Lowdose_2rad_IMAC_MSA1	5869	1	3	3.4604	547.5	0.194544	0.441071	6.68735	0.001905	LKTEKEPDATPPS*PR	979.844	54.8418	-1	-1
Lowdose_2rad_IMAC_MSA1	11892	1	3	3.4585	486.5	0.359549	0.599624	6.46445	2.5e-05	RTPS*DDEEDNLFTPPK	1358.69	36.8721	-1	-1
Lowdose_2rad_IMAC_MSA1	11620	1	2	3.4582	132.2	0.345122	0.587471	4.2339	0.000216	TS*SAELSTSAPDEPLLQK	1881.74	0	-1	-1
Lowdose_2rad_IMAC_MSA1	10066	1	2	3.4562	65.7	0.337596	0.58103	1.84092	0.000715	ETNLDS*LPLVDTHSKR	1358.64	122.478	-1	-1
Lowdose_2rad_IMAC_MSA1	4351	1	2	3.4558	1117.7	0.50353	0.709598	6.0655	0	GPPASS*PAPAPK	1118.1	101.178	-1	-1
Lowdose_2rad_IMAC_MSA1	10309	1	3	3.4555	658.5	0.435595	0.659996	5.9173	1e-06	YKDIIRQPS*EEEIIK	1418.18	165.139	-1	-1
Lowdose_2rad_IMAC_MSA1	9749	1	2	3.4545	130.2	0.427732	0.654012	3.17258	3.1e-05	LGGLRPES*PESLTSVSR	1617.69	63.2703	-1	-1
Lowdose_2rad_IMAC_MSA1	12600	1	2	3.4543	172.3	0.292389	0.54073	1.60351	0.000534	S*SGFISELPSEEGK	1096.64	0	-1	-1
Lowdose_2rad_IMAC_MSA1	10241	1	2	3.4539	757.8	0.484641	0.696162	5.39761	0	ASS*LNFLNK	1188.08	50.5889	-1	-1
Lowdose_2rad_IMAC_MSA1	10997	1	2	3.453	341.3	0.285114	0.533961	5.03551	0.000294	DLFDYS*PPLHK	1192.58	33.5845	-1	-1
Lowdose_2rad_IMAC_MSA1	3346	1	2	3.4523	462.3	0.449758	0.67064	5.24943	3e-06	RESPS*PAPKPR	1604.88	9.513	-1	-1
Lowdose_2rad_IMAC_MSA1	15431	1	3	3.4507	188	0.480888	0.693461	4.70296	1.2e-05	S*SSSPELQTLQDILGDPGDKADVGR	1720.66	0	-1	-1
Lowdose_2rad_IMAC_MSA1	10777	1	3	3.4495	532.1	0.210088	0.458354	5.32771	0.001441	VS*HQGYSTEAEFEEPR	1658.73	13.5686	-1	-1
Lowdose_2rad_IMAC_MSA1	12834	1	4	3.4493	295.1	0.346795	0.588893	5.53155	1.3e-05	IEDS*EPHIPLIDDTDAEDDAPTKR	705.851	76.6254	-1	-1
Lowdose_2rad_IMAC_MSA1	8014	1	3	3.4491	290.2	0.255342	0.505314	3.9136	0.001441	KQPPVSPGTALVGSQKEPSEVPT*PK	1564.64	36.9422	-1	-1
Lowdose_2rad_IMAC_MSA1	11835	1	2	3.4481	1070.5	0.406108	0.637266	5.08844	2e-06	S*FTGGLGQLVVPSK	1415.63	66.4386	-1	-1
Lowdose_2rad_IMAC_MSA1	10128	1	2	3.4466	661.3	0.505687	0.711117	4.61482	0	NLALDEAGQRST*M	2411.5	43.2193	-1	-1
Lowdose_2rad_IMAC_MSA1	9011	1	2	3.4463	88.5	0.44024	0.663506	7.35243	4.4e-05	EYIPGQPPLSQSSDSS*PTR	1847.83	50.5889	-1	-1
Lowdose_2rad_IMAC_MSA1	11750	1	2	3.446	235.6	0.357197	0.59766	3.95702	6.1e-05	ETSFGS*SENITMTSLSK	1764.87	56.5109	-1	-1
Lowdose_2rad_IMAC_MSA1	12907	1	2	3.4448	1197.8	0.512512	0.715899	4.78157	0	S*LDSDES*EDEEDDYQQK	1802.2	0	132.095	-1
Lowdose_2rad_IMAC_MSA1	14601	1	2	3.4437	300.7	0.399018	0.631679	4.87088	1.6e-05	S*PTPAPFSPFNPTSLIK	661.149	0	-1	-1
Lowdose_2rad_IMAC_MSA1	11522	1	2	3.4416	706.9	0.409897	0.640232	4.6144	4e-06	SLS*MVDLQDAR	1540.49	56.5109	-1	-1
Lowdose_2rad_IMAC_MSA1	10687	1	2	3.4398	514.6	0.161899	0.402367	5.13306	0.00478	RKVMDS*DEDDDY	1816.78	72.5028	-1	-1
Lowdose_2rad_IMAC_MSA1	4018	1	3	3.4383	592.8	0.471774	0.686858	7.76882	1e-06	PGPTPSGTNVGSS*GRSPSK	1468.37	0	-1	-1
Lowdose_2rad_IMAC_MSA1	5525	1	2	3.4373	471.2	0.320571	0.56619	6.35835	6.1e-05	RS*PS*PYYSR	1532.79	89.4356	46.6551	-1
Lowdose_2rad_IMAC_MSA1	9244	1	2	3.4361	237.9	0.205349	0.453154	4.98817	0.003703	TTRT*PEEGGYSYDISEK	1558.25	20.2076	-1	-1
Lowdose_2rad_IMAC_MSA1	11646	1	3	3.4359	176.9	0.270468	0.520065	-2.04684	0.002505	KPPGT*PPPSALPLGAPPPDALPPGPTPEDSPSLETGSR	1033.91	0	-1	-1
Lowdose_2rad_IMAC_MSA1	14135	1	3	3.4352	465.4	0.257656	0.507598	5.19843	0.000448	GSQAQPDS*PSAQLALIAASQSFLQPGGK	1142.75	0	-1	-1
Lowdose_2rad_IMAC_MSA1	14671	1	2	3.4348	111.3	0.469867	0.685468	0.931356	1.6e-05	RSS*SSGDQSSDSLNSPTLLAL	437.261	0	-1	-1
Lowdose_2rad_IMAC_MSA1	6149	1	3	3.4327	626.1	0.240219	0.490121	6.92073	0.000448	YHGHS*MSDPGVSYR	1412.7	45.5662	-1	-1
Lowdose_2rad_IMAC_MSA1	5849	1	2	3.4297	431.1	0.359915	0.599929	6.62921	3.1e-05	SKVGS*TENIK	743.328	28.879	-1	-1
Lowdose_2rad_IMAC_MSA1	7070	1	2	3.4261	438.4	0.454599	0.67424	5.57535	3e-06	CDSSPDS*AEDVRK	1419.66	136.532	-1	-1
Lowdose_2rad_IMAC_MSA1	11013	1	2	3.4258	471.6	0.228443	0.477957	6.0207	0.000715	TLSS*SAQEDIIR	1605.76	0	-1	-1
Lowdose_2rad_IMAC_MSA1	12062	1	4	3.4245	251.6	0.434691	0.659311	4.91557	2e-06	AKTQT*PPVS*PAPQPTEERLPSSPVYEDAASFK	1345.11	0	5.0114	-1
Lowdose_2rad_IMAC_MSA1	8389	1	2	3.4233	1084	0.212543	0.461024	7.03376	0.000397	RQS*FAVLR	-1	-1	-1	-1
Lowdose_2rad_IMAC_MSA1	10842	1	4	3.4225	588.3	0.385917	0.621222	5.16312	1e-06	LLKEGEEPTVYS*DEEEPKDESAR	1816.5	46.5836	-1	-1
Lowdose_2rad_IMAC_MSA1	4534	1	2	3.422	224.5	0.247312	0.497305	5.42193	0.001263	GASGGAGGRS*LDSR	1083.9	67.6816	-1	-1
Lowdose_2rad_IMAC_MSA1	11583	1	3	3.4215	669.7	0.307614	0.55463	5.78575	4.8e-05	LHS*SNPNLSTLDFGEEK	1868.98	0	-1	-1
Lowdose_2rad_IMAC_MSA1	5160	1	2	3.4207	445.3	0.327711	0.57246	4.56883	6.1e-05	PFSAPKPQT*SPSPK	1581.74	0	-1	-1
Lowdose_2rad_IMAC_MSA1	9695	1	2	3.419	574.2	0.23928	0.489163	6.02932	0.000397	GAES*PFEEK	-1	-1	-1	-1
Lowdose_2rad_IMAC_MSA1	5656	1	3	3.4184	515.2	0.256875	0.506828	6.50617	0.000448	KGDRS*PEPGQTWTR	1069.78	146.55	-1	-1
Lowdose_2rad_IMAC_MSA1	14690	1	2	3.418	563.3	0.363429	0.602851	4.54835	1.6e-05	TSS*EDNLYLAVLR	1874.78	56.5109	-1	-1
Lowdose_2rad_IMAC_MSA1	8198	1	2	3.4163	222.5	0.298305	0.546173	4.96301	0.000294	WDGS*EEDEDNSKK	1197.95	76.8318	-1	-1
Lowdose_2rad_IMAC_MSA1	5872	1	2	3.4159	474.4	0.284581	0.533461	6.70233	0.000158	IPRPLS*PTK	1045.54	25.6136	-1	-1
Lowdose_2rad_IMAC_MSA1	9667	1	2	3.4156	569.1	0.212671	0.461163	4.36861	0.000953	WDGS*EEDEDNSK	1715.62	159.202	-1	-1
Lowdose_2rad_IMAC_MSA1	5839	1	3	3.4146	723.4	0.179933	0.424185	6.63573	0.001905	FARS*DDEQSSADKER	1055.11	143.717	-1	-1
Lowdose_2rad_IMAC_MSA1	14426	1	3	3.4125	257.2	0.365216	0.604331	2.3554	0.000129	EAEALLQSMGLTPESPIVPPPMSPS*SK	1588.69	0	-1	-1
Lowdose_2rad_IMAC_MSA1	11664	1	2	3.4105	375.1	0.345785	0.588035	6.3947	4.4e-05	RIS*EMEEELK	-1	-1	-1	-1
Lowdose_2rad_IMAC_MSA1	3408	1	2	3.41	335.2	0.457361	0.676285	5.20221	4e-06	KPIETGS*PKTK	1511.6	21.8934	-1	-1
Lowdose_2rad_IMAC_MSA1	10434	1	4	3.4075	152.6	0.216992	0.465824	-1.01412	0.004786	RLRS*LTAQIVILDVNDHNPT*FIS*FPNAHVK	188.965	0	4.8126	3.1836
Lowdose_2rad_IMAC_MSA1	4511	1	3	3.4051	685.2	0.274265	0.523703	6.00141	0.000129	SVGKVEPS*SQSPGRS*PR	1403.23	40.9493	28.8712	-1
Lowdose_2rad_IMAC_MSA1	4607	1	2	3.4031	721.4	0.375511	0.61279	6.78911	8e-06	SAS*ASHQADIK	1395.62	27.0275	-1	-1
Lowdose_2rad_IMAC_MSA1	6176	1	2	3.4023	603.7	0.359375	0.599479	6.08932	1.6e-05	GGLS*PANDTGAK	674.878	139.386	-1	-1
Lowdose_2rad_IMAC_MSA1	5862	1	3	3.4021	344.8	0.255754	0.505721	7.09248	0.001084	LKTEKEPDATPPS*PR	904.701	74.3267	-1	-1
Lowdose_2rad_IMAC_MSA1	6305	1	3	3.401	437	0.21135	0.459728	5.58644	0.001905	SDKS*PDLAPTPAPQSTPR	1815.38	12.1046	-1	-1
Lowdose_2rad_IMAC_MSA1	10039	1	2	3.4002	473.5	0.34548	0.587775	3.10515	3.1e-05	DSENLAS*PSEYPENGER	1992.02	87.4145	-1	-1
Lowdose_2rad_IMAC_MSA1	13731	1	2	3.4	150.2	0.226882	0.476321	4.47047	0.003703	KCS*LPAEEDSVLEK	533.193	118.801	-1	-1
Lowdose_2rad_IMAC_MSA1	3373	1	3	3.3996	524.4	0.268267	0.517945	6.93406	0.000331	RES*PSPAPKPR	909.72	54.6801	-1	-1
Lowdose_2rad_IMAC_MSA1	8297	1	2	3.3992	165.9	0.482908	0.694916	5.29168	6e-06	AVT*PVPTKTEEVSNLK	1341.41	99.9471	-1	-1
Lowdose_2rad_IMAC_MSA1	10491	1	3	3.3988	476.9	0.20875	0.456892	5.66476	0.001905	APEAAVSEDGKS*DDELLSSK	802.018	0	-1	-1
Lowdose_2rad_IMAC_MSA1	5518	1	2	3.3984	536.8	0.354755	0.595613	4.85051	2.2e-05	SGS*MDPSGAHPSVR	1545.02	46.5836	-1	-1
Lowdose_2rad_IMAC_MSA1	5545	1	3	3.3984	350.3	0.425318	0.652164	5.95204	1.2e-05	STTSQVTPAEEKDGHS*PMSK	710.882	27.1933	-1	-1
Lowdose_2rad_IMAC_MSA1	8954	1	3	3.3971	145.1	0.284213	0.533116	7.5112	0.002505	SKS*YDEGLDDYREDAK	682.973	46.6551	-1	-1
Lowdose_2rad_IMAC_MSA1	6509	1	3	3.3937	573.8	0.35563	0.596347	5.4749	2.5e-05	VASEAPLEHKPQVEAS*SPR	914.667	0	-1	-1
Lowdose_2rad_IMAC_MSA1	6531	1	2	3.3921	86	0.360219	0.600182	4.08667	0.000294	APS*RQDVYGPQPQVR	1138.95	204.925	-1	-1
Lowdose_2rad_IMAC_MSA1	4956	1	2	3.3915	497.4	0.234616	0.484372	6.60854	0.000715	YRS*PYSGPK	1164.02	23.9593	-1	-1
Lowdose_2rad_IMAC_MSA1	10437	1	2	3.3903	146.4	0.297673	0.545594	8.1365	0.000534	T*ISPSTSNNIPLMR	953.561	36.73	-1	-1
Lowdose_2rad_IMAC_MSA1	9397	1	2	3.3892	483.7	0.275139	0.524537	4.22059	0.000216	RS*PVPAQIAITVPK	1113.29	117.637	-1	-1
Lowdose_2rad_IMAC_MSA1	3213	1	3	3.389	386.1	0.332753	0.576847	6.37238	9.4e-05	VKS*PSKQAPGEK	1031.73	60.8236	-1	-1
Lowdose_2rad_IMAC_MSA1	9887	1	3	3.3867	346.4	0.256946	0.506898	7.56708	0.001084	SLDDS*EEDDDEDSGHSSR	1314.99	112.33	-1	-1
Lowdose_2rad_IMAC_MSA1	11165	1	2	3.3859	198	0.444402	0.666635	3.62778	1.1e-05	AAS*PAKPSSLDLVPNLPK	912.844	89.775	-1	-1
Lowdose_2rad_IMAC_MSA1	12052	1	2	3.3851	333.5	0.50867	0.713211	3.69391	1e-06	FNDS*EGDDTEETEDYR	1998.47	262.903	-1	-1
Lowdose_2rad_IMAC_MSA1	7252	1	4	3.3847	453	0.273495	0.522967	5.88194	6.4e-05	YREYS*PPYAPSHQQYPPSHATPLPK	2263.05	0	-1	-1
Lowdose_2rad_IMAC_MSA1	14023	1	2	3.3843	301.7	0.359424	0.59952	5.20129	4.4e-05	LFVLLPEQS*PVSYSK	1807.83	38.9152	-1	-1
Lowdose_2rad_IMAC_MSA1	12156	1	2	3.3793	121.4	0.2792	0.528394	3.64158	0.001263	EVDGLLTSEPMGS*PVSSK	2279.88	50.7334	-1	-1
Lowdose_2rad_IMAC_MSA1	7363	1	2	3.3786	706.6	0.249127	0.499126	6.14726	0.000294	RFS*DSEER	1010.39	87.4145	-1	-1
Lowdose_2rad_IMAC_MSA1	11480	1	3	3.3776	625.7	0.161594	0.401988	6.14076	0.004262	GGFDS*PFYRDSLPGSQR	2300.29	204.925	-1	-1
Lowdose_2rad_IMAC_MSA1	9359	1	2	3.3773	402.2	0.333876	0.57782	4.97707	6.1e-05	VGS*PLTLTDAQTR	1446.83	87.4145	-1	-1
Lowdose_2rad_IMAC_MSA1	14172	1	2	3.3766	308.9	0.421311	0.649085	5.5247	1.1e-05	AGS*ISTLDSLDFAR	1178.02	92.8771	-1	-1
Lowdose_2rad_IMAC_MSA1	9164	1	2	3.3755	535.6	0.234128	0.483868	4.05264	0.000534	SPSGSAFGS*QENLR	1233.71	62.2447	-1	-1
Lowdose_2rad_IMAC_MSA1	3904	1	2	3.375	332.5	0.394015	0.627706	5.51417	1.6e-05	SRGS*PRYS*PR	1620.97	50.7334	66.4386	-1
Lowdose_2rad_IMAC_MSA1	13812	1	2	3.3737	511	0.546492	0.739251	3.48095	0	VENMSSNQDGNDS*DEFM	1863.08	175.749	-1	-1
Lowdose_2rad_IMAC_MSA1	12938	1	3	3.372	317.7	0.502877	0.709138	0.944897	2e-06	GIPLATGDTS*PEPELLPGAPLPPPKEVINGNIK	1556.39	0	-1	-1
Lowdose_2rad_IMAC_MSA1	15026	1	2	3.3717	48.5	0.467628	0.683833	9.57388	6.1e-05	T*GSSSPPGGPPKPGSQLDSMLGSLQSDLNK	1072.96	0	-1	-1
Lowdose_2rad_IMAC_MSA1	15197	1	2	3.3711	599.7	0.304233	0.551573	6.27273	8.4e-05	SSLS*GDEEDELFK	1604.58	85.6197	-1	-1
Lowdose_2rad_IMAC_MSA1	11863	1	2	3.3705	514.5	0.222371	0.471562	4.88181	0.000953	SVSPT*FLNPSDENLK	1484.97	0	-1	-1
Lowdose_2rad_IMAC_MSA1	5841	1	2	3.3695	273	0.354771	0.595627	6.00559	6.1e-05	SKVGS*TENIK	408.273	25.4036	-1	-1
Lowdose_2rad_IMAC_MSA1	8781	1	4	3.3684	177.9	0.241361	0.491285	7.09249	0.001455	DLIRLESIDNHSST*GGQS*DQGYGSKDELIK	566.683	19.2919	19.2919	-1
Lowdose_2rad_IMAC_MSA1	12215	1	2	3.3676	613.9	0.465821	0.682511	3.8699	1e-06	IS*APNVDFNLEGPK	-1	-1	-1	-1
Lowdose_2rad_IMAC_MSA1	11280	1	4	3.3674	347.5	0.304538	0.55185	5.28712	4.4e-05	KLGDVS*PTQIDVSQFGSFKEDTK	1554.79	0	-1	-1
Lowdose_2rad_IMAC_MSA1	8933	1	2	3.3671	212.4	0.359449	0.599541	9.74751	8.4e-05	AAEDDEDDDVDTKKQKT*DEDD	1198.92	110.814	-1	-1
Lowdose_2rad_IMAC_MSA1	8537	1	2	3.3638	199.7	0.21877	0.467729	1.65689	0.002853	EGNTTEDDFPSS*PGNGNK	1670.68	46.5836	-1	-1
Lowdose_2rad_IMAC_MSA1	6436	1	2	3.3635	341.6	0.260175	0.510074	-0.299271	0.000534	GYTS*DSEVYTDHGRPGK	1374.83	0	-1	-1
Lowdose_2rad_IMAC_MSA1	11885	1	2	3.3628	843.7	0.366451	0.605352	7.08297	8e-06	GGFDS*PFYR	1403.89	124.705	-1	-1
Lowdose_2rad_IMAC_MSA1	8001	1	2	3.3627	202	0.310197	0.556953	3.04324	0.000294	GT*DDSPKDSQEDLQER	1690.47	21.7585	-1	-1
Lowdose_2rad_IMAC_MSA1	10923	1	2	3.3601	151.3	0.394691	0.628244	9.21613	6.1e-05	KSLDS*DES*EDEEDDYQQKR	1299.37	0	50.8901	-1
Lowdose_2rad_IMAC_MSA1	10088	1	3	3.3598	428.3	0.270611	0.520203	4.87741	0.000448	VQSLEGEKLS*PKSDISPLTPR	1916.67	24.2842	-1	-1
Lowdose_2rad_IMAC_MSA1	13034	1	2	3.3584	63.9	0.450363	0.671091	5.0353	6.1e-05	S*STPPGESYFGVSSLQLK	883.368	0	-1	-1
Lowdose_2rad_IMAC_MSA1	11822	1	3	3.358	195.6	0.243121	0.493073	4.56556	0.004262	TAS*EINFDKLQFEPPLRK	1194.65	27.3069	-1	-1
Lowdose_2rad_IMAC_MSA1	6933	1	2	3.3573	396.8	0.371995	0.609914	10.7669	2.2e-05	FNAHGDANTIVCNS*K	2466.8	85.1603	-1	-1
Lowdose_2rad_IMAC_MSA1	10178	1	3	3.3569	223.1	0.330126	0.574566	5.58809	0.000448	S*EDRRSS*EEREAGEI	430.955	32.5619	46.5836	-1
Lowdose_2rad_IMAC_MSA1	13947	1	3	3.3567	707.5	0.157983	0.397471	4.64613	0.004262	FNEEHIPDSPFVVPVAS*PSGDAR	1205.81	0	-1	-1
Lowdose_2rad_IMAC_MSA1	5496	1	3	3.3555	811.3	0.232871	0.482567	5.2695	0.000331	FIHQQPQSSS*PVYGSSAK	1979.33	86.4386	-1	-1
Lowdose_2rad_IMAC_MSA1	8708	1	3	3.3549	200.2	0.294375	0.542563	6.55782	0.001084	RAPS*VANVGSHCDLSLK	490.316	68.9518	-1	-1
Lowdose_2rad_IMAC_MSA1	12649	1	4	3.3549	149.1	0.238457	0.488321	6.69627	0.002679	MLPHAPGVQMQAIPEDAIPEES*GDEDEDDPDKR	-1	-1	-1	-1
Lowdose_2rad_IMAC_MSA1	9635	1	3	3.3544	175.7	0.271226	0.520794	2.9592	0.002505	MGQAPSQSLLPPAQDQPRS*PVPSAFSDQSR	1481.62	28.7034	-1	-1
Lowdose_2rad_IMAC_MSA1	7242	1	2	3.3539	180.8	0.367662	0.606351	-1.34518	8.4e-05	TPSPKEEDEEPES*PPEKK	1350.55	126.337	-1	-1
Lowdose_2rad_IMAC_MSA1	13312	1	3	3.3532	381.5	0.218776	0.467735	5.54466	0.002505	WLAES*PVGLPPEEEDKLTR	823.886	29.3829	-1	-1
Lowdose_2rad_IMAC_MSA1	13893	1	3	3.3524	503.7	0.185688	0.430915	4.89556	0.003276	QMNMS*PPPGNAGPVIMSIEEK	1346.92	183.935	-1	-1
Lowdose_2rad_IMAC_MSA1	10899	1	3	3.3512	323.2	0.361124	0.600936	5.63245	6.7e-05	KLEKEEEEGISQES*S*EEEQ	1261.53	12.2767	12.2767	-1
Lowdose_2rad_IMAC_MSA1	7838	1	3	3.3496	886.2	0.502269	0.708709	7.2927	0	SES*PKEPEQLR	1174.5	0	-1	-1
Lowdose_2rad_IMAC_MSA1	11404	1	3	3.3487	195.3	0.450384	0.671107	-0.677907	2.5e-05	SKS*PPKVPIVIQDDSLPAGPPPQIR	1045.77	24.3056	-1	-1
Lowdose_2rad_IMAC_MSA1	7371	1	2	3.3483	643	0.247797	0.497792	6.25057	0.000294	RFS*DSEER	1273.38	75.9104	-1	-1
Lowdose_2rad_IMAC_MSA1	15190	1	2	3.344	1152.3	0.496591	0.704692	1.2602	0	MLGEDS*DEEEEMDTSER	1424.25	146.55	-1	-1
Lowdose_2rad_IMAC_MSA1	3400	1	2	3.3434	264.6	0.379584	0.616104	5.95974	4.4e-05	KPIETGS*PKTK	1744.15	27.3069	-1	-1
Lowdose_2rad_IMAC_MSA1	12284	1	3	3.3433	245.5	0.24431	0.494277	4.38546	0.002505	EGMNPSY*DEYADSDEDQHDAYLER	1065.41	23.842	-1	-1
Lowdose_2rad_IMAC_MSA1	12260	1	2	3.3428	357.4	0.289817	0.538347	5.1141	0.000216	FAIQDIS*VEETSAK	985.188	69.9189	-1	-1
Lowdose_2rad_IMAC_MSA1	11184	1	2	3.3424	159.1	0.266276	0.516019	3.43437	0.001263	AAS*PAKPSSLDLVPNLPK	1046.43	80.5619	-1	-1
Lowdose_2rad_IMAC_MSA1	3945	1	2	3.3407	653.8	0.298949	0.546762	5.80313	8.4e-05	GRDS*PYQSR	1222.1	119.755	-1	-1
Lowdose_2rad_IMAC_MSA1	9069	1	2	3.3363	198	0.3711	0.60918	5.12854	8.4e-05	QLS*SGVSEIR	1527.37	56.5109	-1	-1
Lowdose_2rad_IMAC_MSA1	7248	1	2	3.3344	133.3	0.303623	0.55102	1.15365	0.000715	TPSPKEEDEEPES*PPEKK	1376.53	154.688	-1	-1
Lowdose_2rad_IMAC_MSA1	10559	1	4	3.3335	447.5	0.289486	0.538039	5.89473	4.4e-05	NLEELEEKSTT*PPPAEPVSLPQEPPKPR	2298.87	23.537	-1	-1
Lowdose_2rad_IMAC_MSA1	5712	1	3	3.3323	355.4	0.286559	0.535312	6.84965	0.000448	NDKS*EEEQSSSSVK	1308.45	172.221	-1	-1
Lowdose_2rad_IMAC_MSA1	14695	1	3	3.3322	484.8	0.274503	0.52393	3.94549	0.000331	TALPT*SGSSAGELELLAGEVPAR	1061.22	20.6028	-1	-1
Lowdose_2rad_IMAC_MSA1	4597	1	2	3.3304	187.8	0.239431	0.489317	5.18509	0.002186	RRS*PS*PYYSR	1812.1	126.334	31.2397	-1
Lowdose_2rad_IMAC_MSA1	7155	1	2	3.3297	102.5	0.390095	0.624576	9.84874	0.000116	FAS*DDEHDEHDENGATGPVKR	800.039	127.609	-1	-1
Lowdose_2rad_IMAC_MSA1	13341	1	4	3.3287	251	0.19434	0.44084	7.8749	0.003594	LAEAPSPAPTPSPTPVEDLGPQTSTSPGRLS*PDFAEELR	2644.45	16.8983	-1	-1
Lowdose_2rad_IMAC_MSA1	9017	1	3	3.3285	554.4	0.236533	0.486347	7.4815	0.000605	VGS*LDNVGHLPAGGAVK	-1	-1	-1	-1
Lowdose_2rad_IMAC_MSA1	12508	1	2	3.3282	700.7	0.371612	0.6096	4.29171	1.1e-05	ESLKEEDES*DDDNM	2595.56	310.735	-1	-1
Lowdose_2rad_IMAC_MSA1	11087	1	2	3.3266	225.7	0.411742	0.641671	4.08613	2.2e-05	ALVVPEPEPDSDS*NQER	1647.91	24.3056	-1	-1
Lowdose_2rad_IMAC_MSA1	12590	1	4	3.3263	392.7	0.332922	0.576994	4.45863	1.3e-05	RPKS*IDDSEMESPVDDVFYPGTGR	440.636	29.765	-1	-1
Lowdose_2rad_IMAC_MSA1	5511	1	2	3.3248	306	0.417529	0.646165	6.98099	1.1e-05	S*GSMDPSGAHPSVR	1226.92	0	-1	-1
Lowdose_2rad_IMAC_MSA1	13886	1	2	3.3236	426.1	0.31153	0.558149	5.75532	0.000116	VDS*TTCLFPVEEK	1539.41	38.365	-1	-1
Lowdose_2rad_IMAC_MSA1	14113	1	2	3.322	433.1	0.33525	0.579008	5.43532	6.1e-05	TLMLPLTEGS*LR	942.554	124.705	-1	-1
Lowdose_2rad_IMAC_MSA1	13352	1	2	3.3206	261.3	0.229748	0.47932	4.14543	0.001666	STLNPQWNES*FTFK	1426.45	31.1699	-1	-1
Lowdose_2rad_IMAC_MSA1	11966	1	2	3.3197	411.4	0.267946	0.517635	2.64923	0.000397	ASVSPMDEPVPDSES*PIEK	1464.28	75.9104	-1	-1
Lowdose_2rad_IMAC_MSA1	7563	1	2	3.3193	124.9	0.250264	0.500264	6.36813	0.002853	AVS*PLDPSKEVSGK	841.781	126.334	-1	-1
Lowdose_2rad_IMAC_MSA1	5508	1	3	3.3191	399.1	0.391311	0.625549	7.67512	2.5e-05	SGS*GGGSAKEPQEER	872.637	24.3056	-1	-1
Lowdose_2rad_IMAC_MSA1	14433	1	3	3.3191	281	0.375765	0.612997	3.29415	6.7e-05	EAEALLQSMGLTPESPIVPPPMSPS*SK	2021.68	0	-1	-1
Lowdose_2rad_IMAC_MSA1	4106	1	3	3.3175	516	0.427611	0.65392	5.80274	4e-06	SVGKVEPSSQSPGRS*PR	1515.22	24.5066	-1	-1
Lowdose_2rad_IMAC_MSA1	6322	1	2	3.3152	171.9	0.260919	0.510802	6.17749	0.001263	RGNDPLTSS*PGR	927.008	23.9593	-1	-1
Lowdose_2rad_IMAC_MSA1	6022	1	3	3.3132	509.4	0.274719	0.524136	6.13981	0.000243	TDLQGSASPSKVEGVHT*PR	959.305	52.1832	-1	-1
Lowdose_2rad_IMAC_MSA1	4332	1	2	3.3131	476.9	0.243005	0.492955	5.80533	0.000534	KPIETGS*PK	1806.11	75.9104	-1	-1
Lowdose_2rad_IMAC_MSA1	7123	1	2	3.3094	376.9	0.436907	0.660989	4.10414	6e-06	DSSFTEVPRS*PK	1529.43	147.358	-1	-1
Lowdose_2rad_IMAC_MSA1	11114	1	3	3.309	178.1	0.335177	0.578945	4.34403	0.000605	EGEEPTVY*SDEEEPKDESAR	962.085	0	-1	-1
Lowdose_2rad_IMAC_MSA1	3842	1	3	3.3065	468.8	0.303644	0.551039	7.33004	0.000129	HRPS*PPAT*PPPK	-1	-1	-1	-1
Lowdose_2rad_IMAC_MSA1	8022	1	2	3.3043	344.6	0.358079	0.598397	3.00841	4.4e-05	T*ASNPKVENEDEPVR	1148.74	0	-1	-1
Lowdose_2rad_IMAC_MSA1	14737	1	2	3.3041	85.3	0.265882	0.515637	2.55753	0.002853	SES*LDPDSSMDTTLILK	1078.23	46.5836	-1	-1
Lowdose_2rad_IMAC_MSA1	3761	1	2	3.3015	334.6	0.391731	0.625884	5.67338	2.2e-05	SSEDGSPT*PGKR	818.806	46.6551	-1	-1
Lowdose_2rad_IMAC_MSA1	8294	1	2	3.3014	245.4	0.469104	0.684912	4.69221	6e-06	AVT*PVPTKTEEVSNLK	1537.44	136.532	-1	-1
Lowdose_2rad_IMAC_MSA1	6516	1	2	3.3008	388.8	0.175685	0.419148	2.60774	0.00478	SSSIS*EEKGDSDDEKPR	692.038	54.3529	-1	-1
Lowdose_2rad_IMAC_MSA1	5113	1	3	3.3006	482.5	0.425923	0.652628	6.4701	6e-06	SGPKPFSAPKPQT*SPSPK	804.84	0	-1	-1
Lowdose_2rad_IMAC_MSA1	6365	1	2	3.2995	159.2	0.427247	0.653641	2.09143	3.1e-05	AKTQT*PPVSPAPQPTEER	1147.02	89.6661	-1	-1
Lowdose_2rad_IMAC_MSA1	9140	1	2	3.296	475.9	0.448513	0.669711	4.10844	3e-06	SES*QMDITDINTPKPK	1605.94	25.4036	-1	-1
Lowdose_2rad_IMAC_MSA1	10260	1	2	3.2955	162.9	0.387225	0.622274	5.58196	6.1e-05	LGAPENSGIS*TLER	1044.66	0	-1	-1
Lowdose_2rad_IMAC_MSA1	11625	1	2	3.2952	350.1	0.437485	0.661426	4.26886	8e-06	LPSS*PVYEDAASFK	1592.6	66.4386	-1	-1
Lowdose_2rad_IMAC_MSA1	3822	1	2	3.2939	865.7	0.48101	0.693549	2.56242	1e-06	HRPS*PPAT*PPPK	-1	-1	-1	-1
Lowdose_2rad_IMAC_MSA1	5513	1	3	3.2938	482.7	0.301324	0.54893	8.69888	0.000129	SGS*GGGSAKEPQEER	1141.23	27.3069	-1	-1
Lowdose_2rad_IMAC_MSA1	12543	1	4	3.2906	212.7	0.30815	0.555113	5.65903	0.000136	SSHYGGS*LPNVNQIGSGLAEFQSPLHSPLDSSR	1435.81	15.0222	-1	-1
Lowdose_2rad_IMAC_MSA1	10968	1	4	3.29	696.7	0.14465	0.380329	2.27149	0.002679	LLKEGEEPTVYS*DEEEPKDESAR	1258.57	0	-1	-1
Lowdose_2rad_IMAC_MSA1	8257	1	2	3.2891	279.1	0.434617	0.659255	5.43243	1.1e-05	KAS*PEPPDSAEGALK	808.84	169.433	-1	-1
Lowdose_2rad_IMAC_MSA1	3106	1	2	3.288	337.8	0.36104	0.600866	4.83423	4.4e-05	SS*SKSEGSPSQR	2045.93	0	-1	-1
Lowdose_2rad_IMAC_MSA1	12124	1	2	3.2879	790.6	0.425439	0.652257	5.49047	3e-06	SPS*FGAGEGLLR	1479.07	56.5109	-1	-1
Lowdose_2rad_IMAC_MSA1	11324	1	4	3.2868	305.6	0.430905	0.656434	4.26209	1e-06	MLPHAPGVQMQAIPEDAVHEDS*GDEDGEDPDKR	-1	-1	-1	-1
Lowdose_2rad_IMAC_MSA1	10313	1	2	3.2846	56.1	0.312184	0.558734	4.36563	0.001666	ESS*PLYSPTFSDSTSAVK	828.54	0	-1	-1
Lowdose_2rad_IMAC_MSA1	5982	1	2	3.2837	227.9	0.307458	0.554489	7.5007	0.000294	ALS*ASHTDLAH	1005.07	28.097	-1	-1
Lowdose_2rad_IMAC_MSA1	10011	1	2	3.2804	170.8	0.291763	0.540151	4.59005	0.000715	LCDDGPQLPTS*PR	1377.02	0	-1	-1
Lowdose_2rad_IMAC_MSA1	11865	1	3	3.2795	77.7	0.336423	0.58002	5.33643	0.003276	S*GTPTQDEMMDKPTSSSVDTMSLLSK	793.155	0	-1	-1
Lowdose_2rad_IMAC_MSA1	8783	1	4	3.2794	114.7	0.352351	0.593592	5.01514	0.000136	QEASTGQSPEDHASLAPPLS*PDHSSLEAK	911.21	25.8855	-1	-1
Lowdose_2rad_IMAC_MSA1	6793	1	2	3.2785	723.3	0.299222	0.547012	6.81772	8.4e-05	LNT*SDFQK	2074.88	112.877	-1	-1
Lowdose_2rad_IMAC_MSA1	11131	1	3	3.2783	231.4	0.345087	0.587441	4.88577	0.000243	ENQEPLRS*PEVGDEEALRPLTK	954.413	27.0538	-1	-1
Lowdose_2rad_IMAC_MSA1	7756	1	4	3.2778	381.5	0.323449	0.568726	6.11733	2e-05	ERVPS*VAEAPQLRPAGTAAAK	1095.59	53.6088	-1	-1
Lowdose_2rad_IMAC_MSA1	5514	1	2	3.2776	171.9	0.258146	0.508081	6.23188	0.001666	NSASATTPLSGNS*SR	920.904	0	-1	-1
Lowdose_2rad_IMAC_MSA1	3129	1	2	3.2774	306.1	0.209465	0.457673	4.99344	0.002853	STQKS*PATAPK	1169.66	33.936	-1	-1
Lowdose_2rad_IMAC_MSA1	3081	1	3	3.2769	351	0.365834	0.604842	6.61104	4.8e-05	RLNHS*PPQSSSR	568.443	73.3033	-1	-1
Lowdose_2rad_IMAC_MSA1	5937	1	2	3.2766	1123.8	0.227583	0.477057	6.45677	0.000294	RDYSY*ER	1203.54	31.0284	-1	-1
Lowdose_2rad_IMAC_MSA1	3393	1	3	3.2746	409	0.429304	0.655213	6.77137	9e-06	KPIETGS*PKTK	1065.14	27.3069	-1	-1
Lowdose_2rad_IMAC_MSA1	11694	1	2	3.2725	407.2	0.200703	0.447999	5.97148	0.002186	GLLS*PPMGQSGLR	1074.81	139.312	-1	-1
Lowdose_2rad_IMAC_MSA1	9810	1	2	3.2707	514.9	0.311615	0.558225	5.02932	8.4e-05	SSS*PVQVEEEPVR	1476.07	0	-1	-1
Lowdose_2rad_IMAC_MSA1	8771	1	3	3.2704	505.2	0.37555	0.612821	5.47876	1.7e-05	INNYLTVPAHKLDS*PTMSR	816.51	0	-1	-1
Lowdose_2rad_IMAC_MSA1	12656	1	4	3.2695	282.9	0.289647	0.538189	4.30696	0.000136	MLPHAPGVQMQAIPEDAIPEES*GDEDEDDPDKR	-1	-1	-1	-1
Lowdose_2rad_IMAC_MSA1	9753	1	2	3.2692	230.6	0.402086	0.634103	4.90308	3.1e-05	LGGLRPES*PESLTSVSR	1156.84	80.5339	-1	-1
Lowdose_2rad_IMAC_MSA1	12432	1	4	3.2679	581.7	0.494691	0.703343	6.92169	0	QGS*FTIEKPSPNIPIELIPHINK	2084.17	0	-1	-1
Lowdose_2rad_IMAC_MSA1	14798	1	3	3.2673	464.1	0.239862	0.489757	4.32758	0.000812	RRGSSGS*VDET*LFALPAASEPVIR	1489	0	29.2956	-1
Lowdose_2rad_IMAC_MSA1	3304	1	3	3.2669	392	0.290489	0.53897	5.76646	0.000331	ARS*RT*PPSAPSQSR	1087.95	137.496	137.496	-1
Lowdose_2rad_IMAC_MSA1	9082	1	3	3.2669	144.9	0.27699	0.526298	-16.4959	0.003276	GNKS*PS*PPDGSPAATPEIR	757.334	25.3542	15.1581	-1
Lowdose_2rad_IMAC_MSA1	15378	1	3	3.2659	364	0.214336	0.462964	5.81151	0.003276	KET*ES*EAEDNLDDLEK	-1	-1	-1	-1
Lowdose_2rad_IMAC_MSA1	5532	1	2	3.2657	479.2	0.29179	0.540176	5.50332	0.000158	RS*PS*PYYSR	1889.43	118.894	36.8721	-1
Lowdose_2rad_IMAC_MSA1	7266	1	2	3.2655	553.5	0.392712	0.626667	7.02437	1.1e-05	GRLS*PVPVPR	-1	-1	-1	-1
Lowdose_2rad_IMAC_MSA1	10752	1	2	3.2654	489.6	0.356618	0.597175	7.1073	3.1e-05	DEILPTT*PISEQK	1035.51	46.5836	-1	-1
Lowdose_2rad_IMAC_MSA1	12243	1	3	3.2627	1008.7	0.1812	0.425676	7.16657	0.001084	KKS*PNELVDDLFK	-1	-1	-1	-1
Lowdose_2rad_IMAC_MSA1	12833	1	3	3.2623	497.6	0.380836	0.617119	5.81072	1.7e-05	ESAS*PTIPNLDLLEAHTK	1442.13	46.6551	-1	-1
Lowdose_2rad_IMAC_MSA1	3418	1	2	3.2604	337.6	0.458655	0.677241	5.43521	4e-06	SKTPPKSY*STAR	1641.48	0	-1	-1
Lowdose_2rad_IMAC_MSA1	11139	1	2	3.2604	548.6	0.385413	0.620816	5.74848	1.1e-05	SGYMS*DSDLMGK	1936.06	75.9104	-1	-1
Lowdose_2rad_IMAC_MSA1	9392	1	2	3.2603	169	0.277919	0.52718	5.54469	0.000953	RS*PVPAQIAITVPK	1332.28	141.063	-1	-1
Lowdose_2rad_IMAC_MSA1	13128	1	4	3.2596	381.4	0.262946	0.512783	7.71625	0.000136	TILRDLT*RLQPHNLADVLTVNPDSPASDPT*VFHK	479.046	19.355	32.4659	-1
Lowdose_2rad_IMAC_MSA1	5162	1	2	3.2587	200.7	0.208335	0.456437	2.21141	0.00478	SRSPGS*PVGEGTGSPPK	730.768	29.2956	-1	-1
Lowdose_2rad_IMAC_MSA1	12879	1	3	3.2587	286.5	0.390616	0.624993	2.14083	4.8e-05	TQT*PPVS*PAPQPTEERLPSSPVYEDAASFK	872.681	21.8934	53.662	-1
Lowdose_2rad_IMAC_MSA1	5401	1	2	3.258	638.2	0.174647	0.417908	7.47446	0.002853	VGGS*SVDLHR	1788.71	56.5109	-1	-1
Lowdose_2rad_IMAC_MSA1	13138	1	2	3.2539	702.5	0.275638	0.525012	6.56016	0.000158	ASS*LEDLVLK	1800.05	36.4386	-1	-1
Lowdose_2rad_IMAC_MSA1	10164	1	4	3.253	237.3	0.207224	0.455219	5.31668	0.002679	TGVLNENTVSAGKDLSTS*PKPS*PIPS*PVLGR	1726.47	0	11.2142	57.5702
Lowdose_2rad_IMAC_MSA1	7316	1	2	3.2519	253.1	0.360128	0.600107	4.6688	8.4e-05	RSTS*PIIGSPPVR	1508.95	36.4386	-1	-1
Lowdose_2rad_IMAC_MSA1	8686	1	3	3.2507	269.7	0.440367	0.663602	5.29794	1.7e-05	RLGGLRPES*PESLTSVSR	1514.59	101.784	-1	-1
Lowdose_2rad_IMAC_MSA1	3576	1	2	3.2494	291.8	0.236998	0.486824	5.72901	0.001263	RRT*PS*PPPR	-1	-1	-1	-1
Lowdose_2rad_IMAC_MSA1	9062	1	2	3.2461	308	0.221805	0.470962	4.99344	0.001666	RIDIS*PSTLR	1010.45	21.8934	-1	-1
Lowdose_2rad_IMAC_MSA1	5373	1	3	3.246	415.3	0.219378	0.468378	6.06891	0.001905	SKSQSSGSSAT*HPISVPGAR	1086.99	23.8069	-1	-1
Lowdose_2rad_IMAC_MSA1	13925	1	3	3.2453	445.8	0.323822	0.569054	5.61175	9.4e-05	AGEQQLS*EPEDMEMEAGDTDDPPR	2377.58	311.395	-1	-1
Lowdose_2rad_IMAC_MSA1	12867	1	3	3.2389	125.6	0.368428	0.606983	4.46261	0.000605	KAS*PEAASTPRDPIDVDLPEEAER	1334.04	73.3033	-1	-1
Lowdose_2rad_IMAC_MSA1	11722	1	3	3.2387	506.1	0.263408	0.513233	6.66116	0.000331	KLS*LPTDLKPDLDVK	981.107	56.9275	-1	-1
Lowdose_2rad_IMAC_MSA1	3109	1	2	3.2381	423.9	0.17955	0.423733	6.21929	0.003703	SSTRAPS*PTK	740.213	88.2612	-1	-1
Lowdose_2rad_IMAC_MSA1	8175	1	3	3.2365	108	0.348154	0.590046	5.1937	0.001084	TPKDS*PGIPPSANAHQLFR	1033.93	0	-1	-1
Lowdose_2rad_IMAC_MSA1	7160	1	2	3.2361	405.9	0.180464	0.424811	6.61343	0.003703	RVQT*PLLR	-1	-1	-1	-1
Lowdose_2rad_IMAC_MSA1	14834	1	3	3.2353	238.4	0.323525	0.568793	3.8332	0.000448	EVQTPQYLNPFDEPEAFVT*IKDSPPQSTK	806.146	0	-1	-1
Lowdose_2rad_IMAC_MSA1	5242	1	3	3.2349	316.6	0.250301	0.500301	6.4701	0.001441	SGPKPFSAPKPQTSPS*PK	974.732	0	-1	-1
Lowdose_2rad_IMAC_MSA1	8542	1	3	3.2341	338.4	0.297826	0.545734	6.20328	0.000331	RNS*RDGDPLPSSLSCK	1271.19	131.757	-1	-1
Lowdose_2rad_IMAC_MSA1	8788	1	4	3.234	451.4	0.434756	0.65936	6.91357	0	INNYLTVPAHKLDS*PTMSR	1288.82	0	-1	-1
Lowdose_2rad_IMAC_MSA1	8729	1	2	3.2338	242	0.38178	0.617883	4.61384	4.4e-05	TTS*PPEVSGYSYEK	2159.52	56.5109	-1	-1
Lowdose_2rad_IMAC_MSA1	7197	1	2	3.2332	263.3	0.43675	0.660871	4.81848	1.1e-05	SRLTPVS*PESSSTEEK	1275.28	58.9315	-1	-1
Lowdose_2rad_IMAC_MSA1	8587	1	2	3.2293	428	0.408231	0.63893	5.91078	1.1e-05	RPES*PSEISPIK	1260.05	46.6551	-1	-1
Lowdose_2rad_IMAC_MSA1	12783	1	4	3.2287	387.4	0.213399	0.461951	0.710984	0.000766	S*KEGHSLEMENENLVENGADSDEDDNSFLK	1216.17	0	-1	-1
Lowdose_2rad_IMAC_MSA1	5323	1	4	3.2286	357.8	0.209812	0.458052	7.49518	0.00106	LVPRPGSGSSSGSSNSGSQPGSHPGS*QSGSGERFR	887.564	0	-1	-1
Lowdose_2rad_IMAC_MSA1	14568	1	3	3.2273	227.1	0.351098	0.592535	5.43405	0.000243	S*SSSPELQTLQDILGDPGDKADVGR	1787.51	0	-1	-1
Lowdose_2rad_IMAC_MSA1	11876	1	2	3.227	63.3	0.419492	0.647682	5.96307	0.000158	EMLAS*DDEEDVSSKVEK	1155.02	135.486	-1	-1
Lowdose_2rad_IMAC_MSA1	6059	1	2	3.2256	174.2	0.242653	0.492598	2.16115	0.002186	SPADPTDLGGQT*SPRR	1141.65	0	-1	-1
Lowdose_2rad_IMAC_MSA1	8034	1	2	3.2247	149.9	0.325922	0.570896	5.70526	0.000397	VSGRTS*PPLLDR	1424.74	81.1779	-1	-1
Lowdose_2rad_IMAC_MSA1	12235	1	2	3.2243	709.2	0.472444	0.687346	5.41971	1e-06	GSGTAS*DDEFENLR	1525.09	76.73	-1	-1
Lowdose_2rad_IMAC_MSA1	12844	1	3	3.2233	270.3	0.236776	0.486596	4.31247	0.003276	AGPDLPSLPSHALEDEGWAAAAPS*PGSAR	984.766	0	-1	-1
Lowdose_2rad_IMAC_MSA1	14009	1	2	3.2227	219.3	0.400223	0.632632	5.70257	3.1e-05	IPRPLS*LIGSTLR	788.798	29.4609	-1	-1
Lowdose_2rad_IMAC_MSA1	3283	1	2	3.2203	1134.1	0.341956	0.58477	6.88998	1.6e-05	RPS*QGPPAR	-1	-1	-1	-1
Lowdose_2rad_IMAC_MSA1	6869	1	4	3.2201	206.6	0.235738	0.485529	5.99513	0.001455	TKFAS*DDEHDEHDENGATGPVKR	2147.28	59.4985	-1	-1
Lowdose_2rad_IMAC_MSA1	3048	1	2	3.2193	474.7	0.307054	0.554125	7.32226	0.000116	TNGHS*PSQPR	1533.11	110.209	-1	-1
Lowdose_2rad_IMAC_MSA1	8572	1	3	3.2186	78.8	0.419157	0.647423	4.91239	0.000448	ERDHS*PTPSVFNSDEER	856.68	25.8184	-1	-1
Lowdose_2rad_IMAC_MSA1	8582	1	2	3.2161	174.3	0.235005	0.484773	5.43475	0.002853	TYSLGS*ALRPSTSR	506.039	0	-1	-1
Lowdose_2rad_IMAC_MSA1	9452	1	4	3.2159	334.4	0.183028	0.427818	3.61908	0.003594	LGADESEEEGRRGS*LSNAGDPEIVK	1508.63	12.8803	-1	-1
Lowdose_2rad_IMAC_MSA1	9230	1	3	3.2149	385.2	0.354972	0.595795	7.24207	6.7e-05	NSATFKS*FEDR	1095.84	101.784	-1	-1
Lowdose_2rad_IMAC_MSA1	6032	1	3	3.2141	462.7	0.257739	0.50768	5.26338	0.000605	TDLQGSASPSKVEGVHT*PR	1627.34	33.1466	-1	-1
Lowdose_2rad_IMAC_MSA1	10246	1	2	3.2133	413.6	0.475337	0.689447	6.40909	3e-06	ASS*LNFLNK	1573.81	40.5889	-1	-1
Lowdose_2rad_IMAC_MSA1	3434	1	2	3.2103	728.7	0.2116	0.46	5.74612	0.000953	RPS*PQPSPR	1554.31	141.785	-1	-1
Lowdose_2rad_IMAC_MSA1	9691	1	3	3.2102	432.3	0.296929	0.544912	5.70001	0.000243	KRES*ES*ESDETPPAAPQLIK	1055.04	0	0	-1
Lowdose_2rad_IMAC_MSA1	3332	1	2	3.2088	502.3	0.248473	0.498471	5.86622	0.000534	SEDARS*SPSQR	1133.94	0	-1	-1
Lowdose_2rad_IMAC_MSA1	12764	1	2	3.2084	265	0.44904	0.670104	1.50609	8e-06	LCDFGS*ASHVADNDITPY*LVSR	1181.95	50.7334	28.097	-1
Lowdose_2rad_IMAC_MSA1	13979	1	2	3.2078	278	0.239011	0.488888	0.671666	0.001263	TIGGGDDS*FNTFFSETGAGK	1616.7	63.2703	-1	-1
Lowdose_2rad_IMAC_MSA1	7317	1	2	3.2074	630	0.386263	0.621501	5.06781	1.1e-05	SQS*IEQESQEK	1379.84	40.807	-1	-1
Lowdose_2rad_IMAC_MSA1	13541	1	2	3.207	135.2	0.279981	0.529132	5.2407	0.001263	DMDEPS*PVPNVEEVTLPK	1387.18	83.0432	-1	-1
Lowdose_2rad_IMAC_MSA1	6788	1	2	3.2032	763.3	0.307162	0.554222	6.81772	6.1e-05	LNT*SDFQK	1834.36	112.877	-1	-1
Lowdose_2rad_IMAC_MSA1	10374	1	2	3.2023	440.6	0.315554	0.561742	6.37017	0.000116	SLGS*PLLHER	1481.42	35.1743	-1	-1
Lowdose_2rad_IMAC_MSA1	3245	1	3	3.2019	281.7	0.224898	0.474234	6.73678	0.003276	RNS*SSSSSPSERPR	669.574	27.0275	-1	-1
Lowdose_2rad_IMAC_MSA1	12901	1	4	3.2006	389.1	0.188558	0.434233	5.28938	0.001981	IADGVNEINTENMISSIEPEKQDS*PPPKPPR	1108.81	60.328	-1	-1
Lowdose_2rad_IMAC_MSA1	3248	1	2	3.1995	271.8	0.214315	0.462942	6.05524	0.002853	SRT*SPVTR	1270.3	0	-1	-1
Lowdose_2rad_IMAC_MSA1	7873	1	2	3.1959	598	0.438844	0.662453	5.94023	3e-06	ASAVSELS*PR	1152.02	97.4119	-1	-1
Lowdose_2rad_IMAC_MSA1	11909	1	3	3.1953	955.9	0.460927	0.678916	6.22584	0	RTPS*DDEEDNLFAPPK	1922.86	0	-1	-1
Lowdose_2rad_IMAC_MSA1	10724	1	2	3.1936	920.8	0.361723	0.601434	6.01027	1.1e-05	YFDS*GDYNMAK	1818.23	74.2009	-1	-1
Lowdose_2rad_IMAC_MSA1	8382	1	2	3.1905	591.2	0.454694	0.67431	7.06971	2e-06	DYDDMS*PR	1715.05	51.1975	-1	-1
Lowdose_2rad_IMAC_MSA1	9912	1	4	3.1905	592.9	0.402382	0.634336	6.53039	0	HIKEEPLS*EEEPCTSTAIASPEKK	2190.87	24.6262	-1	-1
Lowdose_2rad_IMAC_MSA1	13030	1	2	3.1901	137.8	0.353218	0.594321	6.52217	0.000216	GIPLATGDTS*PEPELLPGAPLPPPK	1416.16	46.5836	-1	-1
Lowdose_2rad_IMAC_MSA1	13134	1	2	3.19	428.7	0.348997	0.59076	6.96965	4.4e-05	ASS*LEDLVLK	1328.48	66.4386	-1	-1
Lowdose_2rad_IMAC_MSA1	13086	1	3	3.1874	155.2	0.338207	0.581556	5.78427	0.000812	GIPLATGDTS*PEPELLPGAPLPPPKEVINGNIK	1535.19	31.0284	-1	-1
Lowdose_2rad_IMAC_MSA1	14735	1	2	3.1869	227.6	0.341052	0.583997	2.7425	0.000158	DLFSLDSEDPSPAS*PPLR	1125.68	59.6197	-1	-1
Lowdose_2rad_IMAC_MSA1	8237	1	2	3.1858	111.5	0.274029	0.523478	8.56471	0.001666	KGAGDGS*DEEVDGKADGAEAKPAE	-1	-1	-1	-1
Lowdose_2rad_IMAC_MSA1	4978	1	2	3.1857	118.8	0.287472	0.536164	5.24306	0.001263	SGSLGQPSPS*AQR	1179.95	36.8721	-1	-1
Lowdose_2rad_IMAC_MSA1	7985	1	2	3.1848	206	0.40709	0.638036	4.7931	3.1e-05	SGTSSPQS*PVFR	1768.2	78.3261	-1	-1
Lowdose_2rad_IMAC_MSA1	14969	1	2	3.183	119.8	0.360729	0.600607	4.38862	0.000216	LPS*EPGMTLLTIR	850.659	81.8517	-1	-1
Lowdose_2rad_IMAC_MSA1	14551	1	3	3.1827	540.1	0.204795	0.452543	2.70309	0.001905	MPQDGS*DDEDEEWPTLEK	1360.04	222.608	-1	-1
Lowdose_2rad_IMAC_MSA1	11702	1	2	3.1819	534.8	0.372545	0.610365	6.05679	2.2e-05	GLLS*PPMGQSGLR	1344.37	164.581	-1	-1
Lowdose_2rad_IMAC_MSA1	10745	1	2	3.1818	65	0.394934	0.628438	2.38839	0.000216	EQDLPLAEAVRPKT*PPVVIK	-1	-1	-1	-1
Lowdose_2rad_IMAC_MSA1	4753	1	2	3.1817	444.3	0.181915	0.426515	7.25735	0.003703	TGS*NAAQYK	1586.01	72.8771	-1	-1
Lowdose_2rad_IMAC_MSA1	14459	1	3	3.1811	268.8	0.305366	0.552599	3.81987	0.000448	EKPDS*DDDLDIASLVTAK	1087.76	119.191	-1	-1
Lowdose_2rad_IMAC_MSA1	8681	1	3	3.1808	246.5	0.298384	0.546245	5.65179	0.000812	RLGGLRPES*PESLTSVSR	1335.36	101.784	-1	-1
Lowdose_2rad_IMAC_MSA1	12271	1	3	3.1802	239.1	0.399377	0.631963	4.66104	6.7e-05	IYHLPDAES*DEDEDFKEQTR	1296.23	94.0669	-1	-1
Lowdose_2rad_IMAC_MSA1	9430	1	3	3.1793	245.2	0.428365	0.654496	5.24309	3.5e-05	RPDPDS*DEDEDYERER	669.274	13.3466	-1	-1
Lowdose_2rad_IMAC_MSA1	11902	1	2	3.1788	699.6	0.188342	0.433984	4.29092	0.001666	RTPS*DDEEDNLFAPPK	2014	132.877	-1	-1
Lowdose_2rad_IMAC_MSA1	9205	1	2	3.1763	185.3	0.236344	0.486152	3.42087	0.002853	S*LPTTVPES*PNYR	812.583	50.7334	19.888	-1
Lowdose_2rad_IMAC_MSA1	5876	1	2	3.1751	360.7	0.300872	0.548518	7.02883	0.000216	IPRPLS*PTK	837.244	20.2076	-1	-1
Lowdose_2rad_IMAC_MSA1	13468	1	2	3.1748	192.7	0.276773	0.526092	6.50072	0.000953	ASLGSLEGEAEAEASS*PK	1789.46	66.4386	-1	-1
Lowdose_2rad_IMAC_MSA1	13235	1	3	3.1732	231.7	0.350088	0.591682	4.80544	0.000243	SAS*PDDDLGSSNWEAADLGNEERK	2169.91	46.6551	-1	-1
Lowdose_2rad_IMAC_MSA1	7235	1	4	3.1707	348	0.362002	0.601666	7.42076	9e-06	TPSPKEEDEEPES*PPEKK	1230.04	72.5354	-1	-1
Lowdose_2rad_IMAC_MSA1	9240	1	3	3.1701	285.1	0.220309	0.469371	5.8537	0.004262	SLLGDSAPTLHLNKGT*PSQSPVVGR	1165.53	54.9944	-1	-1
Lowdose_2rad_IMAC_MSA1	10775	1	2	3.1685	284.7	0.29989	0.547622	4.03941	0.000294	LRLCDDGPQLPT*SPR	945.524	0	-1	-1
Lowdose_2rad_IMAC_MSA1	4349	1	2	3.1645	270.9	0.280866	0.529968	6.83852	0.000534	ATVTPS*PVKGK	1735.93	132.095	-1	-1
Lowdose_2rad_IMAC_MSA1	10741	1	2	3.1638	60.6	0.346798	0.588896	1.13427	0.000715	EQDLPLAEAVRPKT*PPVVIK	-1	-1	-1	-1
Lowdose_2rad_IMAC_MSA1	3169	1	2	3.1625	220.5	0.441233	0.664254	4.62316	1.6e-05	YSHSGS*SSPDTK	1601.01	46.6551	-1	-1
Lowdose_2rad_IMAC_MSA1	8377	1	2	3.1622	614	0.356903	0.597414	7.60743	2.2e-05	DYDDMS*PR	2011.62	74.2003	-1	-1
Lowdose_2rad_IMAC_MSA1	6958	1	3	3.161	238.6	0.355141	0.595937	7.92315	0.000178	KVELS*ESEEDKGGK	737.258	33.7963	-1	-1
Lowdose_2rad_IMAC_MSA1	9199	1	2	3.1607	552.6	0.300123	0.547835	-0.061734	0.000116	IEDVGS*DEEDDSGKDK	2027.32	166.615	-1	-1
Lowdose_2rad_IMAC_MSA1	3656	1	2	3.1598	241.9	0.286442	0.535203	-24.7466	0.000534	QYTNTT*GDVRPPR	1020.89	31.0284	-1	-1
Lowdose_2rad_IMAC_MSA1	10047	1	2	3.1598	185.6	0.451421	0.671879	5.68485	1.6e-05	TQT*PPLGQTPQLGLK	1224.72	56.5109	-1	-1
Lowdose_2rad_IMAC_MSA1	9661	1	2	3.1594	411.5	0.404855	0.636282	3.60064	1.6e-05	WDGS*EEDEDNSK	1000.77	138.099	-1	-1
Lowdose_2rad_IMAC_MSA1	3114	1	2	3.1573	457.4	0.251069	0.501068	6.65464	0.000534	SSTRAPS*PTK	740.844	51.5843	-1	-1
Lowdose_2rad_IMAC_MSA1	9370	1	2	3.1563	269	0.244622	0.494593	7.22606	0.001263	DLS*TSPKPS*PIPS*PVLGR	1249.85	0	86.4446	164.541
Lowdose_2rad_IMAC_MSA1	13091	1	2	3.156	749.6	0.386914	0.622024	3.87325	8e-06	SSS*LESLQTAVAEVR	1730.64	0	-1	-1
Lowdose_2rad_IMAC_MSA1	5787	1	2	3.1539	283.9	0.394464	0.628064	5.29487	3.1e-05	SES*PKEPEQLRK	1215.19	28.879	-1	-1
Lowdose_2rad_IMAC_MSA1	6350	1	3	3.1536	639.5	0.275019	0.524423	6.63907	0.000178	AKT*QTPPVSPAPQPTEER	1890.37	0	-1	-1
Lowdose_2rad_IMAC_MSA1	14606	1	2	3.1524	691.6	0.502506	0.708877	4.96371	1e-06	SSS*QENLLDEVMK	1867.33	0	-1	-1
Lowdose_2rad_IMAC_MSA1	5404	1	2	3.1515	519.4	0.294463	0.542644	6.35835	0.000158	RS*PS*PYYSR	1039.65	118.894	36.8721	-1
Lowdose_2rad_IMAC_MSA1	10302	1	3	3.1485	610	0.420137	0.64818	7.10076	4e-06	YKDIIRQPS*EEEIIK	1177.34	117.753	-1	-1
Lowdose_2rad_IMAC_MSA1	12306	1	2	3.1472	279.2	0.439692	0.663093	5.27163	1.1e-05	ASS*LGEIDESSELR	1434.04	0	-1	-1
Lowdose_2rad_IMAC_MSA1	4415	1	2	3.1468	474.2	0.35544	0.596188	6.72443	4.4e-05	RVPS*PTPAPK	796.246	21.8934	-1	-1
Lowdose_2rad_IMAC_MSA1	11338	1	4	3.1467	423.8	0.233133	0.482838	4.00552	0.000392	MLPHAPGVQMQAIPEDAVHEDS*GDEDGEDPDKR	-1	-1	-1	-1
Lowdose_2rad_IMAC_MSA1	8890	1	3	3.1461	292.8	0.352722	0.593904	3.77357	0.000129	VDNLTYRT*SPDTLR	1204.47	86.4386	-1	-1
Lowdose_2rad_IMAC_MSA1	7414	1	3	3.1448	263.3	0.338686	0.581967	7.67552	0.000243	SRS*DNALHLASER	940.898	21.8934	-1	-1
Lowdose_2rad_IMAC_MSA1	6153	1	3	3.1436	653.9	0.312858	0.559337	7.13828	4.8e-05	YHGHS*MSDPGVSYR	1175.59	14.1132	-1	-1
Lowdose_2rad_IMAC_MSA1	9774	1	2	3.1412	128.7	0.407997	0.638746	5.6812	8.4e-05	ERPS*SAIYPSDSFR	773.894	0	-1	-1
Lowdose_2rad_IMAC_MSA1	8680	1	2	3.1401	711.9	0.350339	0.591894	4.15275	2.2e-05	NSQEDS*EDSEDKDVK	1412.39	126.75	-1	-1
Lowdose_2rad_IMAC_MSA1	14840	1	2	3.1396	847.7	0.254491	0.504471	5.28837	0.000216	SLTSS*LENIFSR	2490.96	0	-1	-1
Lowdose_2rad_IMAC_MSA1	14128	1	3	3.1395	217.1	0.323141	0.568455	2.76691	0.000605	GSQAQPDS*PSAQLALIAASQSFLQPGGK	672.594	12.1046	-1	-1
Lowdose_2rad_IMAC_MSA1	12537	1	2	3.1373	378	0.427597	0.653909	5.3592	8e-06	TCS*FGGFDLTNR	1372.35	36.73	-1	-1
Lowdose_2rad_IMAC_MSA1	5193	1	2	3.1368	701.1	0.243082	0.493033	8.23164	0.000397	RLS*TSPVR	1418.11	46.5836	-1	-1
Lowdose_2rad_IMAC_MSA1	13217	1	4	3.1361	306.1	0.180766	0.425166	5.38579	0.004786	LQALKEEPQTVPEMPGET*PPLS*PIDMESQER	1642.57	62.3939	41.1395	-1
Lowdose_2rad_IMAC_MSA1	4784	1	2	3.1334	293.6	0.233772	0.4835	-26.9993	0.001666	NKDNS*TACSHPVT*K	549.6	0	76.6044	-1
Lowdose_2rad_IMAC_MSA1	9411	1	2	3.1323	394.6	0.364556	0.603785	7.56791	4.4e-05	MS*GFIYQGK	1162.08	118.894	-1	-1
Lowdose_2rad_IMAC_MSA1	9195	1	4	3.1316	681.4	0.293428	0.54169	5.51753	1.3e-05	ERSPALKS*PLQSVVVR	836.424	14.6689	-1	-1
Lowdose_2rad_IMAC_MSA1	7195	1	2	3.1314	483	0.362873	0.602389	5.49836	3.1e-05	CDSSPDS*AEDVRK	1026.78	119.204	-1	-1
Lowdose_2rad_IMAC_MSA1	14800	1	3	3.1299	341.7	0.308125	0.55509	5.41713	0.000331	MES*PIPILPLPTPDAETEK	1608.06	107.868	-1	-1
Lowdose_2rad_IMAC_MSA1	11848	1	4	3.1269	335	0.378682	0.615371	5.76274	6e-06	RREPES*PPASAPIPLFGADTIGQR	810.546	0	-1	-1
Lowdose_2rad_IMAC_MSA1	12643	1	3	3.1256	483.4	0.247792	0.497787	5.31675	0.000605	LPDS*DDDEDEETAIQR	1372.82	120.205	-1	-1
Lowdose_2rad_IMAC_MSA1	7309	1	2	3.1248	315.7	0.323605	0.568863	4.75779	0.000158	RST*SPIIGSPPVR	1712.93	0	-1	-1
Lowdose_2rad_IMAC_MSA1	6347	1	2	3.1216	331.5	0.291261	0.539686	6.05378	0.000294	LRLSPS*PT*SQR	1415.18	64.6347	64.6347	-1
Lowdose_2rad_IMAC_MSA1	4922	1	2	3.1183	433.6	0.191996	0.438173	5.92322	0.002853	SHSS*PSQIPK	1642.83	0	-1	-1
Lowdose_2rad_IMAC_MSA1	9974	1	2	3.1163	862.4	0.335558	0.579274	6.20637	3.1e-05	AMADELS*EK	-1	-1	-1	-1
Lowdose_2rad_IMAC_MSA1	4604	1	2	3.1131	570.8	0.375221	0.612553	5.9875	1.6e-05	SAS*ASHQADIK	1587.61	28.879	-1	-1
Lowdose_2rad_IMAC_MSA1	6786	1	3	3.1118	363.9	0.348319	0.590186	5.43245	9.4e-05	TVS*DNS*LSNSRGEGKPDLK	760.693	46.6551	43.5078	-1
Lowdose_2rad_IMAC_MSA1	8301	1	2	3.1104	213	0.401974	0.634014	4.36928	4.4e-05	KET*PPPLVPPAAR	-1	-1	-1	-1
Lowdose_2rad_IMAC_MSA1	8499	1	4	3.1035	400	0.463187	0.680578	7.09161	0	LLKPGEEPSEY*TDEEDTKDHNKQD	1527.7	28.879	-1	-1
Lowdose_2rad_IMAC_MSA1	4484	1	2	3.1029	473.2	0.242193	0.492131	5.55437	0.000715	T*SPAKQQAPPVR	1372.48	0	-1	-1
Lowdose_2rad_IMAC_MSA1	9508	1	3	3.1024	295.4	0.249742	0.499742	4.87288	0.001905	NSQEDS*EDS*EDKDVK	706.602	87.8229	109.388	-1
Lowdose_2rad_IMAC_MSA1	3140	1	3	3.102	536.5	0.195068	0.441665	7.4143	0.002505	RPATADS*PKPSAK	804.926	0	-1	-1
Lowdose_2rad_IMAC_MSA1	11856	1	2	3.0992	372.2	0.213668	0.462242	4.26593	0.002186	SVS*PTFLNPSDENLK	1298.68	0	-1	-1
Lowdose_2rad_IMAC_MSA1	13233	1	3	3.0985	563.9	0.304341	0.551671	6.39322	9.4e-05	SLS*ELESLKLPAESNEK	1141.16	46.6551	-1	-1
Lowdose_2rad_IMAC_MSA1	12978	1	2	3.0972	774.8	0.251937	0.501933	7.66379	0.000294	SMS*AEDLLER	1558.19	46.5836	-1	-1
Lowdose_2rad_IMAC_MSA1	10041	1	2	3.0959	331	0.393327	0.627158	6.57379	3.1e-05	GEPNVSY*ICSR	1778.72	56.5109	-1	-1
Lowdose_2rad_IMAC_MSA1	3953	1	3	3.0956	336	0.401441	0.633594	8.61857	2.5e-05	ARRGS*SSDEEGGPK	745.438	50.7334	-1	-1
Lowdose_2rad_IMAC_MSA1	10216	1	3	3.0947	88.6	0.396969	0.630055	4.6794	0.000605	NYDPYKPLDIT*PPPDQK	766.429	86.6238	-1	-1
Lowdose_2rad_IMAC_MSA1	8535	1	2	3.094	287.2	0.350259	0.591827	4.17631	8.4e-05	SFSLASSSNS*PISQR	2017.93	87.4145	-1	-1
Lowdose_2rad_IMAC_MSA1	10054	1	2	3.0936	285.1	0.312516	0.559031	4.2081	0.000216	SVAAEGALLPQTPPS*PR	1102.6	99.9471	-1	-1
Lowdose_2rad_IMAC_MSA1	7883	1	4	3.0895	373.4	0.189222	0.434997	6.56296	0.001981	LQDSSDPDTGSEEEGSSRLS*PPHSPR	1784.15	0	-1	-1
Lowdose_2rad_IMAC_MSA1	9224	1	3	3.0864	644.1	0.457297	0.676237	7.50197	1e-06	NSATFKS*FEDR	691.289	73.1182	-1	-1
Lowdose_2rad_IMAC_MSA1	6317	1	2	3.0859	263.6	0.309375	0.556215	5.79242	0.000294	LRLS*PSPT*SQR	1604.02	107.22	40.4991	-1
Lowdose_2rad_IMAC_MSA1	4442	1	2	3.0857	554.5	0.365492	0.604559	6.45772	2.2e-05	KLS*GDQPAAR	-1	-1	-1	-1
Lowdose_2rad_IMAC_MSA1	11659	1	2	3.0853	432.2	0.258354	0.508285	5.87832	0.000534	RIS*EMEEELK	-1	-1	-1	-1
Lowdose_2rad_IMAC_MSA1	12277	1	3	3.0837	227.6	0.351818	0.593142	5.76955	0.000243	IYHLPDAES*DEDEDFKEQTR	731.206	29.2867	-1	-1
Lowdose_2rad_IMAC_MSA1	7259	1	2	3.0791	455.1	0.369946	0.608232	6.60615	3.1e-05	GRLS*PVPVPR	-1	-1	-1	-1
Lowdose_2rad_IMAC_MSA1	14468	1	2	3.0786	42.6	0.373839	0.611424	2.57343	0.000715	EKPDS*DDDLDIASLVTAK	880.139	112.318	-1	-1
Lowdose_2rad_IMAC_MSA1	3075	1	3	3.0785	370.1	0.298587	0.546431	7.61811	0.000331	RLNHS*PPQSSSR	877.267	73.3033	-1	-1
Lowdose_2rad_IMAC_MSA1	3528	1	2	3.0772	345.8	0.304303	0.551637	6.04836	0.000216	S*SPEQPRPSTSK	590.086	0	-1	-1
Lowdose_2rad_IMAC_MSA1	11310	1	3	3.075	447.9	0.320065	0.565743	5.70677	0.000129	ETNLDS*LPLVDTHSK	925.533	106.697	-1	-1
Lowdose_2rad_IMAC_MSA1	6599	1	3	3.0729	295.1	0.387614	0.622587	6.23338	4.8e-05	TAS*FSESRADEVAPAKK	1206.54	87.4145	-1	-1
Lowdose_2rad_IMAC_MSA1	10172	1	2	3.0726	158.5	0.319078	0.56487	4.08335	0.000534	STPFIVPS*SPTEQEGR	1888.41	36.73	-1	-1
Lowdose_2rad_IMAC_MSA1	10761	1	2	3.072	312.6	0.246647	0.496636	5.35848	0.001263	DEILPTT*PISEQK	1181.07	23.9593	-1	-1
Lowdose_2rad_IMAC_MSA1	6150	1	3	3.071	276	0.314556	0.560853	5.30537	0.000448	SSEPVQHEES*IRKPSPEPR	382.951	31.3777	-1	-1
Lowdose_2rad_IMAC_MSA1	10994	1	2	3.0707	439.7	0.326864	0.57172	5.70278	0.000116	DLFDY*SPPLHK	702.199	0	-1	-1
Lowdose_2rad_IMAC_MSA1	5107	1	3	3.0699	410.7	0.334799	0.578618	6.37693	9.4e-05	SGPKPFSAPKPQT*SPSPK	579.759	23.9593	-1	-1
Lowdose_2rad_IMAC_MSA1	3519	1	2	3.0663	242.3	0.381665	0.61779	3.6535	6.1e-05	TVTPASSAKTS*PAK	1748.64	86.4386	-1	-1
Lowdose_2rad_IMAC_MSA1	5847	1	2	3.066	261.5	0.330007	0.574462	6.385	0.000216	SGLTVPT*SPKGR	1051.37	27.0275	-1	-1
Lowdose_2rad_IMAC_MSA1	9922	1	3	3.0643	512.7	0.249323	0.499323	4.35579	0.000605	QAHDLS*PAAESSSTFSFSGR	923.876	62.0036	-1	-1
Lowdose_2rad_IMAC_MSA1	12263	1	3	3.0633	170.1	0.417752	0.646337	3.56864	9.4e-05	TQT*PPVSPAPQPTEERLPSSPVYEDAASFK	697.409	36.8721	-1	-1
Lowdose_2rad_IMAC_MSA1	9056	1	2	3.0621	295.7	0.28696	0.535686	5.67292	0.000534	RIDIS*PSTLR	465.585	18.1803	-1	-1
Lowdose_2rad_IMAC_MSA1	14592	1	2	3.0619	614.1	0.428819	0.654843	5.87546	6e-06	ASS*FADMMGILK	1716.89	56.4386	-1	-1
Lowdose_2rad_IMAC_MSA1	14923	1	3	3.0617	332	0.207532	0.455557	8.88581	0.004262	RRGS*S*GSVDETLFALPAASEPVIR	1345.67	0	0	-1
Lowdose_2rad_IMAC_MSA1	2906	1	3	3.0606	337.1	0.376331	0.613458	7.66406	4.8e-05	RVS*HS*PPPKQR	-1	-1	-1	-1
Lowdose_2rad_IMAC_MSA1	4449	1	2	3.0541	568.4	0.382666	0.6186	6.675	1.6e-05	KLS*GDQPAAR	-1	-1	-1	-1
Lowdose_2rad_IMAC_MSA1	14963	1	2	3.0521	171	0.289702	0.53824	5.21699	0.000953	S*SLSGDEEDELFK	1174.29	0	-1	-1
Lowdose_2rad_IMAC_MSA1	4414	1	2	3.0509	249.5	0.3281	0.5728	5.63032	0.000216	ERDAEQSGS*PR	1028.55	67.806	-1	-1
Lowdose_2rad_IMAC_MSA1	7443	1	2	3.0492	362.6	0.342811	0.585501	5.83353	8.4e-05	GNDPLTSS*PGR	1867.39	87.4145	-1	-1
Lowdose_2rad_IMAC_MSA1	5759	1	3	3.0483	311.6	0.421022	0.648862	7.25167	1.7e-05	SES*PKEPEQLRK	1395.65	46.6551	-1	-1
Lowdose_2rad_IMAC_MSA1	7037	1	2	3.0468	121.3	0.266279	0.516022	6.47824	0.002186	SKS*PS*PPRLTEDR	557.234	66.2936	38.1902	-1
Lowdose_2rad_IMAC_MSA1	10112	1	3	3.0453	99.4	0.441434	0.664405	9.03027	0.000178	EYIPGQPPLSQSSDSS*PTRNSEPAGLETPEAK	676.263	33.6764	-1	-1
Lowdose_2rad_IMAC_MSA1	4746	1	2	3.0451	585.6	0.196315	0.443074	7.25735	0.002186	TGS*NAAQYK	1707.39	132.877	-1	-1
Lowdose_2rad_IMAC_MSA1	4100	1	4	3.0446	228.3	0.265224	0.514999	7.18988	0.00055	GRKDDDS*DDESQSSHTGK	1624.57	62.5265	-1	-1
Lowdose_2rad_IMAC_MSA1	10249	1	3	3.0442	270	0.327245	0.572053	4.48868	0.000331	LSVPT*S*DEEDEVPAPKPR	1041.37	49.3131	60.8817	-1
Lowdose_2rad_IMAC_MSA1	8717	1	4	3.044	1057.2	0.329895	0.574365	5.27705	1e-06	HIPTALPVSGTLSSS*NPDLLQSHHR	868.984	0	-1	-1
Lowdose_2rad_IMAC_MSA1	6842	1	3	3.0417	923.7	0.353092	0.594215	6.26469	9e-06	GRRS*PILLPK	-1	-1	-1	-1
Lowdose_2rad_IMAC_MSA1	10343	1	2	3.0412	257.3	0.23494	0.484706	5.55729	0.002186	ALAMPGRPES*PPVFR	-1	-1	-1	-1
Lowdose_2rad_IMAC_MSA1	4103	1	3	3.0386	514.1	0.334891	0.578698	7.64233	4.8e-05	VGS*TENIKHQPGGGR	996.623	46.5836	-1	-1
Lowdose_2rad_IMAC_MSA1	14599	1	2	3.0373	382.1	0.338426	0.581744	5.26697	8.4e-05	SSS*QENLLDEVMK	1441.83	0	-1	-1
Lowdose_2rad_IMAC_MSA1	14600	1	2	3.0335	515.7	0.419845	0.647954	6.22364	8e-06	ASS*FADMMGILK	1291.92	46.4386	-1	-1
Lowdose_2rad_IMAC_MSA1	4913	1	2	3.0316	541.8	0.238521	0.488386	6.44839	0.000715	SHSS*PSQIPK	1858.72	46.6551	-1	-1
Lowdose_2rad_IMAC_MSA1	8263	1	2	3.0296	249.9	0.367837	0.606496	4.97921	8.4e-05	KAS*PEPPDSAEGALK	1251.79	79.1136	-1	-1
Lowdose_2rad_IMAC_MSA1	5396	1	2	3.0269	498.3	0.235224	0.484999	6.07075	0.000953	RS*PS*PYYSR	879.487	89.4356	46.6551	-1
Lowdose_2rad_IMAC_MSA1	6796	1	2	3.0269	190.7	0.229641	0.479209	2.55706	0.003703	QAS*TDAGTAGALTPQHVR	2099.78	66.4386	-1	-1
Lowdose_2rad_IMAC_MSA1	5086	1	3	3.0246	224.4	0.317133	0.563146	7.32836	0.000605	S*PVSTRPLPSASQK	1282.07	109.531	-1	-1
Lowdose_2rad_IMAC_MSA1	7499	1	4	3.0246	123.4	0.238114	0.487969	19.7782	0.004786	SDVIT*HQRT*HTGEKLYVCR	153.548	0	0	-1
Lowdose_2rad_IMAC_MSA1	9843	1	2	3.0235	270.4	0.347677	0.589641	5.20425	0.000116	QLS*LPLTQSK	874.948	85.3814	-1	-1
Lowdose_2rad_IMAC_MSA1	11193	1	3	3.0232	388.4	0.206735	0.454681	5.32742	0.003276	AAPEASS*PPASPLQHLLPGK	1500.85	25.4036	-1	-1
Lowdose_2rad_IMAC_MSA1	14462	1	3	3.0223	357.5	0.29279	0.541101	5.38383	0.000448	EKPDS*DDDLDIASLVTAK	964.224	101.691	-1	-1
Lowdose_2rad_IMAC_MSA1	8278	1	2	3.0219	144.7	0.393229	0.62708	3.21449	0.000116	KET*PPPLVPPAAR	-1	-1	-1	-1
Lowdose_2rad_IMAC_MSA1	3584	1	3	3.0216	265.1	0.322975	0.568309	7.91369	0.000331	LARSS*PEQPRPSTSK	734.619	0	-1	-1
Lowdose_2rad_IMAC_MSA1	11116	1	3	3.0192	139.2	0.298125	0.546008	4.8681	0.002505	SGS*PSDNS*GAEEMEVSLAKPK	1030.73	0	42.4757	-1
Lowdose_2rad_IMAC_MSA1	7567	1	3	3.019	191.6	0.316926	0.562962	6.09136	0.000812	SPS*PAHLPDDPKVAEK	1377.95	48.6032	-1	-1
Lowdose_2rad_IMAC_MSA1	3414	1	3	3.0188	534.1	0.38565	0.621007	7.12224	1.2e-05	SKT*PPKSYSTAR	1217.33	31.2397	-1	-1
Lowdose_2rad_IMAC_MSA1	7844	1	3	3.0188	648.3	0.449914	0.670756	6.72154	1e-06	SES*PKEPEQLR	1297.88	46.6551	-1	-1
Lowdose_2rad_IMAC_MSA1	11095	1	2	3.0181	232.9	0.397402	0.630398	4.98059	4.4e-05	ALVVPEPEPDSDS*NQER	969.168	31.2397	-1	-1
Lowdose_2rad_IMAC_MSA1	3502	1	2	3.0173	386.9	0.380241	0.616637	6.50952	3.1e-05	SPTPKS*PPSR	979.943	38.9152	-1	-1
Lowdose_2rad_IMAC_MSA1	3889	1	2	3.0164	335.5	0.345345	0.587661	6.30625	0.000116	HSCSGS*SPPR	1267.22	0	-1	-1
Lowdose_2rad_IMAC_MSA1	10300	1	2	3.0155	337.9	0.282607	0.531608	6.9041	0.000534	HSLS*LDDIR	1432.91	92.8771	-1	-1
Lowdose_2rad_IMAC_MSA1	11435	1	3	3.0127	180.3	0.276861	0.526176	5.12793	0.002505	KLEKEEEEGISQES*S*EEEQ	276.254	20.6028	20.6028	-1
Lowdose_2rad_IMAC_MSA1	4359	1	2	3.0115	774.4	0.358758	0.598964	5.64689	2.2e-05	GPPASS*PAPAPK	2314.29	86.4386	-1	-1
Lowdose_2rad_IMAC_MSA1	8974	1	2	3.0103	532.2	0.187988	0.433576	4.58723	0.002853	CHS*LGYNFIHK	1645.42	83.1716	-1	-1
Lowdose_2rad_IMAC_MSA1	13287	1	2	3.0086	235	0.254404	0.504385	5.60467	0.001666	ELGS*TEDIYLASR	1147.89	40.807	-1	-1
Lowdose_2rad_IMAC_MSA1	8988	1	3	3.0072	192.6	0.267159	0.516874	-4.07949	0.003276	HVFETEPLQAS*GRPCGRR	477.512	59.5617	-1	-1
Lowdose_2rad_IMAC_MSA1	11903	1	3	3.0071	865.8	0.348941	0.590712	5.39874	1.2e-05	RTPS*DDEEDNLFAPPK	2153.19	87.4145	-1	-1
Lowdose_2rad_IMAC_MSA1	6888	1	2	3.0047	350.3	0.248178	0.498175	6.97701	0.000953	SRNS*PLLER	929.908	24.3056	-1	-1
Lowdose_2rad_IMAC_MSA1	11490	1	2	3.0046	61.6	0.390634	0.625007	5.25043	0.000397	RVS*PLNLSSVTP	720.303	38.3257	-1	-1
Lowdose_2rad_IMAC_MSA1	4339	1	2	3.0045	452.8	0.2668	0.516527	6.26562	0.000534	KPIETGS*PK	2038.08	61.565	-1	-1
Lowdose_2rad_IMAC_MSA1	14473	1	2	3.0036	67.1	0.431316	0.656747	1.18482	0.000116	EKPDS*DDDLDIASLVTAK	1477.1	162.88	-1	-1
Lowdose_2rad_IMAC_MSA1	4405	1	3	3.0031	141.2	0.348407	0.59026	-0.966671	0.000812	RAHTPT*PGIYMGRPTHSGGGGGGGGGGGGGGGGR	1025.02	54.8873	-1	-1
Lowdose_2rad_IMAC_MSA1	8277	1	2	3.0027	214.3	0.375329	0.612641	4.86093	8.4e-05	TPT*PEPAEVETR	1081.68	36.73	-1	-1
Lowdose_2rad_IMAC_MSA1	14730	1	2	3.0021	109.8	0.325339	0.570385	6.76346	0.000715	S*ESLDPDSSMDTTLILK	868.755	36.73	-1	-1
Lowdose_2rad_IMAC_MSA1	8591	1	4	2.9995	354.9	0.257476	0.507421	7.50176	0.000277	MAFTHHPLPVLAGVRPGS*PR	805.364	80.8668	-1	-1
Lowdose_2rad_IMAC_MSA1	9709	1	2	2.9987	888.4	0.348918	0.590693	6.66995	2.2e-05	LGS*FGSITR	1540.53	124.705	-1	-1
Lowdose_2rad_IMAC_MSA1	3890	1	2	2.9961	187	0.42078	0.648676	3.16107	4.4e-05	DTS*PSSGSAVSSSK	1553.81	51.5843	-1	-1
Lowdose_2rad_IMAC_MSA1	12827	1	2	2.9952	652.1	0.284689	0.533563	7.07038	0.000216	SDS*LLSFR	1560.36	46.5836	-1	-1
Lowdose_2rad_IMAC_MSA1	8590	1	2	2.9947	390.9	0.301065	0.548694	5.6645	0.000216	RPES*PSEISPIK	1393.54	67.806	-1	-1
Lowdose_2rad_IMAC_MSA1	6511	1	3	2.9934	204.1	0.261843	0.511706	5.69366	0.003276	RDGPGLERS*PGEPGGAAPER	-1	-1	-1	-1
Lowdose_2rad_IMAC_MSA1	4640	1	3	2.9926	202.8	0.289949	0.538469	7.42866	0.001441	GAKEEHGGLIRS*PR	-1	-1	-1	-1
Lowdose_2rad_IMAC_MSA1	8000	1	2	2.9916	288.1	0.40597	0.637158	6.15511	3.1e-05	SGTSSPQS*PVFR	894.125	126.75	-1	-1
Lowdose_2rad_IMAC_MSA1	11650	1	3	2.9912	251.1	0.269457	0.519092	5.63245	0.001441	KLEKEEEEGISQES*S*EEEQ	1602.33	12.2767	12.2767	-1
Lowdose_2rad_IMAC_MSA1	9852	1	3	2.9877	228.7	0.236168	0.485971	4.45561	0.004262	DKS*PVREPIDNLTPEER	1880.76	181.209	-1	-1
Lowdose_2rad_IMAC_MSA1	8026	1	2	2.9844	260.8	0.253619	0.503606	6.16525	0.001263	TYS*DEANQMR	654.565	46.5836	-1	-1
Lowdose_2rad_IMAC_MSA1	13036	1	2	2.9822	124.1	0.373382	0.61105	-0.799888	0.000216	GIPLATGDTS*PEPELLPGAPLPPPK	1488.63	27.0275	-1	-1
Lowdose_2rad_IMAC_MSA1	9396	1	4	2.9822	217.8	0.305781	0.552975	4.41207	0.000195	VKPPPS*PTTEGPSLQPDLAPEEAAGTQRPK	1731.64	0	-1	-1
Lowdose_2rad_IMAC_MSA1	3851	1	2	2.9816	571	0.188188	0.433806	4.91007	0.002853	RQS*PLPPQK	-1	-1	-1	-1
Lowdose_2rad_IMAC_MSA1	13103	1	2	2.9781	324.1	0.387529	0.622518	4.58558	4.4e-05	LPLLPPES*PGPLR	-1	-1	-1	-1
Lowdose_2rad_IMAC_MSA1	9825	1	3	2.9761	426.8	0.191492	0.437598	4.89643	0.004262	NDGEES*TDRTPLLPGAPR	1233.28	40.8784	-1	-1
Lowdose_2rad_IMAC_MSA1	8713	1	2	2.976	397.2	0.300605	0.548275	4.22425	0.000216	DVYLS*PRDDGYSTK	339.98	33.4342	-1	-1
Lowdose_2rad_IMAC_MSA1	4880	1	2	2.9747	429.8	0.378828	0.61549	7.36308	3.1e-05	NSLS*PATQR	1221.45	94.1937	-1	-1
Lowdose_2rad_IMAC_MSA1	7304	1	4	2.9739	226.1	0.221359	0.470488	7.09172	0.001981	FQNLDKKASSEGGT*AAGAGLDSLHK	172.867	0	-1	-1
Lowdose_2rad_IMAC_MSA1	10159	1	4	2.972	403.7	0.255215	0.505188	5.40315	0.000195	RGS*GSALGGPLDPQFVGPSDTSLGAAPGHR	1254.04	0	-1	-1
Lowdose_2rad_IMAC_MSA1	5066	1	2	2.9715	145	0.321016	0.566583	6.25655	0.000534	SPVS*TRPLPSASQK	652.524	0	-1	-1
Lowdose_2rad_IMAC_MSA1	10929	1	2	2.97	157	0.326431	0.571341	-1.51372	0.000534	KSLDS*DES*EDEEDDYQQKR	1568.06	0	64.8521	-1
Lowdose_2rad_IMAC_MSA1	3300	1	3	2.9675	510	0.242561	0.492505	5.26891	0.000812	DLRAS*PKPTSK	369.334	51.503	-1	-1
Lowdose_2rad_IMAC_MSA1	5765	1	3	2.9673	395.5	0.366225	0.605165	7.25167	4.8e-05	SES*PKEPEQLRK	1464.04	24.3056	-1	-1
Lowdose_2rad_IMAC_MSA1	8111	1	3	2.9648	334.7	0.274926	0.524334	5.92136	0.000812	KQS*EADLAETRPDLK	636.875	129.627	-1	-1
Lowdose_2rad_IMAC_MSA1	12328	1	2	2.9637	466.7	0.287782	0.536453	5.92997	0.000294	ESLKEEDES*DDDNM	1105.29	121.138	-1	-1
Lowdose_2rad_IMAC_MSA1	6974	1	2	2.9622	413.3	0.279387	0.528571	7.72888	0.000397	FGFGAKS*PK	-1	-1	-1	-1
Lowdose_2rad_IMAC_MSA1	10042	1	2	2.9619	204.3	0.28978	0.538312	5.57903	0.000715	LELQFPRT*PEGR	-1	-1	-1	-1
Lowdose_2rad_IMAC_MSA1	4426	1	2	2.9617	388.7	0.213796	0.462381	6.40088	0.002186	RVPS*PTPAPK	1325.08	31.2397	-1	-1
Lowdose_2rad_IMAC_MSA1	9856	1	3	2.9617	222	0.260695	0.510583	14.5539	0.002505	FSVTHHYLVQES*T*DKEGK	331.324	20.3893	20.3893	-1
Lowdose_2rad_IMAC_MSA1	11296	1	3	2.9599	394.3	0.244062	0.494026	0.942027	0.001441	KLEKEEEEGISQES*S*EEEQ	917.358	0	0	-1
Lowdose_2rad_IMAC_MSA1	11925	1	2	2.959	445.6	0.361913	0.601592	4.72333	4.4e-05	DVTNFTVGGFAPMS*PR	2513.93	124.066	-1	-1
Lowdose_2rad_IMAC_MSA1	12586	1	4	2.9584	157.9	0.398087	0.630941	4.1147	2e-05	ERPESPMVPS*EQVVEEAVPLPPQALTTSQDGHR	1234.95	0	-1	-1
Lowdose_2rad_IMAC_MSA1	10954	1	3	2.9564	406.6	0.195812	0.442506	6.75841	0.004262	DMES*PTKLDVTLAK	2220.05	16.8905	-1	-1
Lowdose_2rad_IMAC_MSA1	8515	1	2	2.9556	321.2	0.218636	0.467585	6.62235	0.002853	LRS*EDGLSLGGR	1113.16	73.3033	-1	-1
Lowdose_2rad_IMAC_MSA1	10679	1	4	2.9547	376.4	0.244323	0.49429	5.74569	0.000392	NLEELEEKSTT*PPPAEPVSLPQEPPKPR	1806.22	40.9493	-1	-1
Lowdose_2rad_IMAC_MSA1	10649	1	2	2.9542	822.2	0.245447	0.495426	6.22591	0.000397	AGDLLEDS*PK	-1	-1	-1	-1
Lowdose_2rad_IMAC_MSA1	14785	1	2	2.9534	295.6	0.198314	0.445325	1.27462	0.00478	MES*PIPILPLPTPDAETEK	984.456	112.318	-1	-1
Lowdose_2rad_IMAC_MSA1	8381	1	2	2.9519	178.9	0.394661	0.628221	6.17885	8.4e-05	ANS*PSLFGTEGKPK	1690.2	46.5836	-1	-1
Lowdose_2rad_IMAC_MSA1	8725	3	3	2.9517	219.3	0.296236	0.544276	5.17354	0.001084	QAEMGTQEKS*PGTS*PLLSR	877.444	51.503	28.097	-1
Lowdose_2rad_IMAC_MSA1	5072	1	2	2.951	92.5	0.327686	0.572439	6.25655	0.000953	SPVS*TRPLPSASQK	1027.43	0	-1	-1
Lowdose_2rad_IMAC_MSA1	12515	1	2	2.9497	396.3	0.354951	0.595778	4.88255	6.1e-05	ESLKEEDES*DDDNM	1853.04	216.893	-1	-1
Lowdose_2rad_IMAC_MSA1	13083	1	3	2.9494	245.2	0.261172	0.51105	5.53809	0.001905	VEMYS*GS*DDDDDFNKLPK	800.316	33.5845	51.1345	-1
Lowdose_2rad_IMAC_MSA1	14732	1	2	2.9474	381.5	0.377282	0.614233	4.06714	4.4e-05	DLYRPLS*SDDLDSVGDSV	1285.67	0	-1	-1
Lowdose_2rad_IMAC_MSA1	8032	1	2	2.9471	686.3	0.433613	0.658493	5.70136	4e-06	TYS*DEANQMR	1112.64	46.5836	-1	-1
Lowdose_2rad_IMAC_MSA1	12112	1	4	2.9444	343.4	0.373285	0.610971	3.92348	6e-06	NAIS*LPVIGGPQALTLPTAQAPPKPPR	895.929	83.8911	-1	-1
Lowdose_2rad_IMAC_MSA1	11640	1	3	2.9441	237.8	0.242893	0.492842	-23.6669	0.003276	DTAY*RDPLIPGAGSERR	280.834	0	-1	-1
Lowdose_2rad_IMAC_MSA1	3703	1	2	2.9435	292.9	0.201902	0.449335	7.08559	0.00478	RS*PSLSSK	651.06	107.22	-1	-1
Lowdose_2rad_IMAC_MSA1	4286	1	2	2.9433	579.9	0.197397	0.444294	4.16232	0.002186	RVPS*PTPAPK	1468.92	27.3069	-1	-1
Lowdose_2rad_IMAC_MSA1	13368	1	3	2.9428	540.7	0.486441	0.697453	7.14247	1e-06	QPLLLS*EDEEDTKR	858.856	54.9189	-1	-1
Lowdose_2rad_IMAC_MSA1	11981	1	2	2.9425	372.6	0.393169	0.627032	7.68049	3.1e-05	SKS*CHDLSVL	788.229	0	-1	-1
Lowdose_2rad_IMAC_MSA1	7435	1	2	2.9399	302	0.213681	0.462256	7.34776	0.003703	GNDPLTSS*PGR	1322.19	67.806	-1	-1
Lowdose_2rad_IMAC_MSA1	11147	1	2	2.9393	741.9	0.414078	0.643489	5.48654	6e-06	SGYMS*DSDLMGK	1528.7	61.565	-1	-1
Lowdose_2rad_IMAC_MSA1	5602	1	3	2.9381	81.8	0.320241	0.565898	6.02918	0.004262	VGSLT*PPSS*PKTQR	1013.07	75.9104	23.9593	-1
Lowdose_2rad_IMAC_MSA1	6331	1	2	2.9377	270.3	0.210675	0.458993	5.21167	0.003703	AEDGATPS*PSNETPK	1822.44	60.5653	-1	-1
Lowdose_2rad_IMAC_MSA1	13090	1	3	2.9375	252.7	0.277106	0.526409	5.38378	0.001441	VEMYS*GS*DDDDDFNKLPK	548.795	25.4036	17.4831	-1
Lowdose_2rad_IMAC_MSA1	4943	1	2	2.9374	410	0.361714	0.601427	5.41994	6.1e-05	SNS*EDKLNSK	1739.93	31.0284	-1	-1
Lowdose_2rad_IMAC_MSA1	9782	1	2	2.9372	106.3	0.400279	0.632676	5.32937	0.000158	ERPS*SAIYPSDSFR	737.013	0	-1	-1
Lowdose_2rad_IMAC_MSA1	4290	1	2	2.9365	80.2	0.392644	0.626613	4.29769	0.000294	SSVQGASS*REGS*PAR	748.273	23.9593	85.4952	-1
Lowdose_2rad_IMAC_MSA1	13813	1	2	2.9362	142.4	0.386179	0.621433	2.97183	0.000158	S*STLEPEDDDEDEEDTVTR	1806.73	0	-1	-1
Lowdose_2rad_IMAC_MSA1	3577	1	3	2.9361	408.1	0.25023	0.50023	4.83209	0.001084	RRT*PS*PPPR	-1	-1	-1	-1
Lowdose_2rad_IMAC_MSA1	2891	1	3	2.9347	343.6	0.456742	0.675827	5.61813	6e-06	ASS*HSSQTQGGGSVTKK	1530.69	28.879	-1	-1
Lowdose_2rad_IMAC_MSA1	6405	1	2	2.9338	61.9	0.470005	0.685569	11.0281	6.1e-05	SPSPPT*QHTGQPPGQPSAPSQLSAPR	1047.64	0	-1	-1
Lowdose_2rad_IMAC_MSA1	4291	1	2	2.9333	977.9	0.247128	0.49712	6.93429	0.000294	RVPS*PTPAPK	941.617	36.8721	-1	-1
Lowdose_2rad_IMAC_MSA1	7226	1	2	2.9309	500	0.222491	0.47169	6.45154	0.001666	RFS*FSQR	1296.02	42.5705	-1	-1
Lowdose_2rad_IMAC_MSA1	4283	1	2	2.9302	91.9	0.367483	0.606204	1.87536	0.000397	SSVQGASS*REGS*PAR	712.237	66.4386	59.5958	-1
Lowdose_2rad_IMAC_MSA1	4851	1	2	2.9295	137	0.266394	0.516134	5.54408	0.002186	GSPT*RPNPPVR	666.681	27.0275	-1	-1
Lowdose_2rad_IMAC_MSA1	3269	1	2	2.9291	810.3	0.336076	0.579721	6.40039	4.4e-05	KVVVS*PTKK	1525.04	19.888	-1	-1
Lowdose_2rad_IMAC_MSA1	3132	1	2	2.9284	464.2	0.349918	0.591539	5.17109	6.1e-05	ARS*VS*PPPKR	-1	-1	-1	-1
Lowdose_2rad_IMAC_MSA1	3694	1	4	2.9262	220.7	0.251828	0.501825	8.03264	0.00106	SKVGS*TENIKHQPGGGR	1629.48	0	-1	-1
Lowdose_2rad_IMAC_MSA1	11881	1	2	2.9246	71.2	0.434316	0.659027	3.29538	0.000116	EMLAS*DDEEDVSSKVEK	1456.67	186.464	-1	-1
Lowdose_2rad_IMAC_MSA1	10582	1	4	2.9244	406.1	0.181849	0.426438	2.54927	0.002679	VGGPLAVLGPS*RSSEDLAGPLPSSVSSSSTTSSKPK	493.687	0	-1	-1
Lowdose_2rad_IMAC_MSA1	12209	1	2	2.9221	901.5	0.419287	0.647524	3.94001	4e-06	SCFESS*PDPELK	1642.49	69.4786	-1	-1
Lowdose_2rad_IMAC_MSA1	7837	1	2	2.922	563.1	0.200342	0.447596	7.15271	0.002186	IVDS*PEKLK	-1	-1	-1	-1
Lowdose_2rad_IMAC_MSA1	2914	1	3	2.9213	406.9	0.402287	0.634261	9.47581	1.7e-05	RVS*HS*PPPKQR	-1	-1	-1	-1
Lowdose_2rad_IMAC_MSA1	9786	1	2	2.9211	56.8	0.473212	0.687904	5.43343	8.4e-05	ERLGS*FGSITR	596.614	94.1937	-1	-1
Lowdose_2rad_IMAC_MSA1	9403	1	2	2.92	307.6	0.27226	0.521785	7.56791	0.000715	MS*GFIYQGK	1369.49	89.4356	-1	-1
Lowdose_2rad_IMAC_MSA1	11121	1	3	2.9141	386.4	0.45345	0.673387	5.89252	6e-06	GPRIS*APNVDFNLEGPK	-1	-1	-1	-1
Lowdose_2rad_IMAC_MSA1	3428	1	2	2.9055	266.9	0.341181	0.584107	5.24684	0.000158	SRT*PPSAPSQSR	1355.61	0	-1	-1
Lowdose_2rad_IMAC_MSA1	12294	1	2	2.9041	207.2	0.224717	0.474043	4.39269	0.003703	ISMQDVDLSLGS*PK	812.638	27.1711	-1	-1
Lowdose_2rad_IMAC_MSA1	5480	1	2	2.9035	108.9	0.25421	0.504192	-4.43041	0.00478	AT*GAGDGGGRRGPR	-1	-1	-1	-1
Lowdose_2rad_IMAC_MSA1	5464	1	2	2.9003	493.9	0.22346	0.472716	5.74285	0.001666	RLS*PS*ASPPR	556.068	32.7278	19.888	-1
Lowdose_2rad_IMAC_MSA1	12933	1	4	2.898	178.7	0.327605	0.572368	4.57801	0.000136	GIPLATGDT*SPEPELLPGAPLPPPKEVINGNIK	1064.81	0	-1	-1
Lowdose_2rad_IMAC_MSA1	5333	1	2	2.8955	254.1	0.263305	0.513133	5.9846	0.001263	TTHS*PYEER	895.733	75.9104	-1	-1
Lowdose_2rad_IMAC_MSA1	9458	1	4	2.8941	511.4	0.19443	0.440942	6.92469	0.00106	LGADES*EEEGRRGSLSNAGDPEIVK	1738.33	7.4153	-1	-1
Lowdose_2rad_IMAC_MSA1	9850	1	4	2.8931	232	0.216135	0.464903	17.7708	0.002679	LGIAILNGGNS*T*VQQKMLDY*LK	-1	-1	-1	-1
Lowdose_2rad_IMAC_MSA1	6337	1	3	2.8891	280.9	0.271365	0.520927	13.5127	0.001441	MVPARLGPAVAMVT*GAGRR	-1	-1	-1	-1
Lowdose_2rad_IMAC_MSA1	5966	1	3	2.8866	551.3	0.184057	0.429019	7.3015	0.003276	GRS*FAGNLNTYKR	769.767	90.541	-1	-1
Lowdose_2rad_IMAC_MSA1	11755	1	2	2.886	292.7	0.36982	0.608128	4.47488	8.4e-05	SQS*LPTTLLSPVR	1188.1	40.807	-1	-1
Lowdose_2rad_IMAC_MSA1	6927	1	2	2.8859	464.9	0.375134	0.612482	10.6256	3.1e-05	FNAHGDANTIVCNS*K	1768.73	69.839	-1	-1
Lowdose_2rad_IMAC_MSA1	4907	1	2	2.8834	525.2	0.370743	0.608887	6.72024	3.1e-05	GINGGPSRMS*PK	822.406	56.4419	-1	-1
Lowdose_2rad_IMAC_MSA1	11421	1	3	2.8798	308.6	0.403847	0.63549	4.496	3.5e-05	DPGSPGPFDY*VGAPPAESIPQK	2053.25	19.5629	-1	-1
Lowdose_2rad_IMAC_MSA1	10418	1	2	2.8794	15.9	0.373932	0.6115	2.00166	0.002853	KS*PRPAGPQLFLPDPDPQR	-1	-1	-1	-1
Lowdose_2rad_IMAC_MSA1	3047	1	3	2.8793	270.5	0.241239	0.491161	7.73859	0.003276	ASSHS*SQTQGGGSVTK	1302.83	0	-1	-1
Lowdose_2rad_IMAC_MSA1	13007	1	3	2.8786	155	0.288057	0.536709	4.957	0.002505	GIPLATGDT*SPEPELLPGAPLPPPK	1364.96	0	-1	-1
Lowdose_2rad_IMAC_MSA1	9965	1	2	2.8755	661.8	0.240376	0.490282	6.95892	0.000715	AMADELS*EK	-1	-1	-1	-1
Lowdose_2rad_IMAC_MSA1	7030	1	3	2.8748	521.1	0.180987	0.425426	6.81322	0.004262	SKS*PS*PPRLTEDR	655.806	36.8721	31.3777	-1
Lowdose_2rad_IMAC_MSA1	11212	1	4	2.8736	197.4	0.374791	0.612202	4.10376	3e-05	S*SPQLDPLRKS*PTMEQAVQTASAHLPAPAAVGR	1336.35	0	19.9077	-1
Lowdose_2rad_IMAC_MSA1	10048	1	2	2.8724	171.8	0.280636	0.529751	5.65572	0.001263	LELQFPRT*PEGR	-1	-1	-1	-1
Lowdose_2rad_IMAC_MSA1	12333	1	2	2.8719	873	0.182388	0.427069	4.34561	0.002186	KVMDS*DEDDDY	1065.37	137.357	-1	-1
Lowdose_2rad_IMAC_MSA1	9410	1	3	2.8719	337.1	0.326195	0.571135	2.84689	0.000243	VKPPPS*PTTEGPSLQPDLAPEEAAGTQRPK	1654.82	18.1803	-1	-1
Lowdose_2rad_IMAC_MSA1	4218	1	2	2.8713	405.8	0.248842	0.498841	6.99153	0.000953	DAEQSGS*PR	867.273	42.5705	-1	-1
Lowdose_2rad_IMAC_MSA1	6414	1	2	2.8681	42.7	0.33911	0.582332	9.76206	0.002186	S*PSPPTQHTGQPPGQPSAPSQLSAPR	1449.93	0	-1	-1
Lowdose_2rad_IMAC_MSA1	9431	1	2	2.8669	485.4	0.286546	0.5353	10.6525	0.000294	DS*NNLCLHFNPR	-1	-1	-1	-1
Lowdose_2rad_IMAC_MSA1	13242	1	3	2.8664	197.5	0.41962	0.647781	5.46964	6.7e-05	S*ASPDDDLGSSNWEAADLGNEERK	1187.46	0	-1	-1
Lowdose_2rad_IMAC_MSA1	12211	1	2	2.8649	349.9	0.339384	0.582567	3.5671	0.000116	LVDYARS*VHEEF	1560.34	115.821	-1	-1
Lowdose_2rad_IMAC_MSA1	13224	1	3	2.8631	287.4	0.234361	0.484108	5.94362	0.003276	S*LSELESLKLPAESNEK	879.005	46.6551	-1	-1
Lowdose_2rad_IMAC_MSA1	12690	1	2	2.8614	283.5	0.282764	0.531756	4.17494	0.000715	DTSPDKGELVS*DEEEDT	971.828	95.3297	-1	-1
Lowdose_2rad_IMAC_MSA1	6696	1	4	2.86	401.4	0.249266	0.499265	17.0819	0.000277	LLGHS*PVLRNIT*NS*QAPDGR	-1	-1	-1	-1
Lowdose_2rad_IMAC_MSA1	7391	1	2	2.8592	97	0.454568	0.674217	5.86768	6.1e-05	ETPHS*PGVEDAPIAK	1371.08	53.0125	-1	-1
Lowdose_2rad_IMAC_MSA1	13559	1	2	2.8585	91.1	0.323981	0.569193	3.80058	0.001263	NINMDNDLEVLTSS*PTR	1851.19	0	-1	-1
Lowdose_2rad_IMAC_MSA1	14110	3	2	2.8577	758	0.346712	0.588823	6.91156	3.1e-05	VPS*VESLFR	328.543	40.9493	-1	-1
Lowdose_2rad_IMAC_MSA1	9058	1	2	2.8571	672.1	0.177873	0.42175	5.95094	0.003703	RLS*MEIEK	-1	-1	-1	-1
Lowdose_2rad_IMAC_MSA1	12382	1	4	2.8569	401.4	0.283349	0.532305	4.78211	9.4e-05	IYHLPDAES*DEDEDFKEQTR	2139.74	85.1899	-1	-1
Lowdose_2rad_IMAC_MSA1	4025	1	3	2.8538	711.5	0.44432	0.666573	6.19682	1e-06	PGPTPSGTNVGSS*GRSPSK	1597.9	15.7098	-1	-1
Lowdose_2rad_IMAC_MSA1	8201	1	2	2.8512	614.3	0.367635	0.606329	5.85114	3.1e-05	LDEGT*PPEPK	-1	-1	-1	-1
Lowdose_2rad_IMAC_MSA1	7450	1	4	2.8503	238	0.247272	0.497265	5.80245	0.00106	YREYS*PPYAPSHQQYPPSHATPLPK	2433.74	0	-1	-1
Lowdose_2rad_IMAC_MSA1	13328	1	2	2.8461	90.6	0.403289	0.63505	3.08936	0.000216	QQPPLGPSS*SLLSLPGLK	1340.12	36.73	-1	-1
Lowdose_2rad_IMAC_MSA1	12310	1	4	2.8445	247.5	0.281877	0.530921	7.39756	0.000277	TEVALAKDMES*PTKLDVTLAK	1597.94	16.7001	-1	-1
Lowdose_2rad_IMAC_MSA1	3123	1	3	2.844	449.6	0.282771	0.531762	6.24682	0.000331	GKGS*PRPQAPK	-1	-1	-1	-1
Lowdose_2rad_IMAC_MSA1	12375	1	4	2.8439	422.7	0.417314	0.645998	5.51985	1e-06	IYHLPDAES*DEDEDFKEQTR	2874.68	118.945	-1	-1
Lowdose_2rad_IMAC_MSA1	4141	1	3	2.8405	538	0.25059	0.50059	6.71241	0.000605	HVDSLSQRS*PK	608.645	15.0831	-1	-1
Lowdose_2rad_IMAC_MSA1	6036	1	2	2.8394	195.9	0.226949	0.476392	-2.01992	0.00478	SLDT*QPEQLALRPK	1284.91	0	-1	-1
Lowdose_2rad_IMAC_MSA1	5779	1	2	2.8393	541.7	0.183531	0.428405	6.59345	0.00478	ADS*KESLK	771.896	105.605	-1	-1
Lowdose_2rad_IMAC_MSA1	7573	1	3	2.8364	162.4	0.467106	0.683452	4.68777	3.5e-05	SPS*PAHLPDDPKVAEK	957.923	42.5705	-1	-1
Lowdose_2rad_IMAC_MSA1	6464	1	3	2.8349	433	0.289463	0.538018	1.96006	0.000331	YQYGGLNSGRPVT*PPRTANPPK	1460.67	73.0831	-1	-1
Lowdose_2rad_IMAC_MSA1	5132	1	2	2.8347	149.2	0.40297	0.634799	6.7706	0.000116	ETQS*PEQVKSEK	796.806	56.5109	-1	-1
Lowdose_2rad_IMAC_MSA1	9264	1	3	2.834	175.5	0.280875	0.529976	6.03514	0.002505	ERS*PALKSPLQSVVVR	539.921	41.4882	-1	-1
Lowdose_2rad_IMAC_MSA1	9864	1	4	2.829	196.4	0.313856	0.560229	15.6317	0.000195	KEIGLLSACTIIIGNIIGS*GIFISPK	325.077	19.1222	-1	-1
Lowdose_2rad_IMAC_MSA1	6319	1	2	2.8284	268.9	0.240206	0.490108	6.35278	0.002186	RNS*FSENEK	1178.62	36.8721	-1	-1
Lowdose_2rad_IMAC_MSA1	9734	1	3	2.827	633.9	0.19862	0.445668	3.86693	0.001905	GPTSTSIDNIDGT*PVRDER	995.191	56.2296	-1	-1
Lowdose_2rad_IMAC_MSA1	13175	1	2	2.8262	146.3	0.290602	0.539075	3.40409	0.001263	DLSSS*PPGPYGQEMYAFR	1559.03	56.4386	-1	-1
Lowdose_2rad_IMAC_MSA1	4422	1	2	2.8253	152.4	0.277209	0.526506	5.25317	0.001666	ELKTDS*SPNQAR	1077.69	0	-1	-1
Lowdose_2rad_IMAC_MSA1	12956	1	2	2.8201	543	0.299599	0.547356	4.58982	0.000216	LADLYGS*KDTFDDDS	2034.1	75.9104	-1	-1
Lowdose_2rad_IMAC_MSA1	3211	1	2	2.8187	255.5	0.209813	0.458053	5.2922	0.00478	RRS*PS*PPPTR	510.291	59.4985	74.5809	-1
Lowdose_2rad_IMAC_MSA1	4876	1	2	2.8185	491	0.324357	0.569523	7.25067	0.000116	NSLS*PATQR	1687.74	74.5809	-1	-1
Lowdose_2rad_IMAC_MSA1	4811	1	2	2.8161	462.8	0.464046	0.681209	6.76441	4e-06	HYQGEEKS*D	1091.82	74.886	-1	-1
Lowdose_2rad_IMAC_MSA1	14458	1	2	2.8158	261.3	0.42155	0.649269	-3.79596	3.1e-05	EAEALLQSMGLTPESPIVPPPMSPS*SK	1280.11	0	-1	-1
Lowdose_2rad_IMAC_MSA1	7430	1	2	2.8142	671.4	0.221271	0.470395	6.26891	0.001263	LNS*PPSSIYK	1089.52	126.75	-1	-1
Lowdose_2rad_IMAC_MSA1	13906	1	4	2.8131	550.9	0.248978	0.498977	7.39775	0.000136	ASLGS*LEGEAEAEASS*PKGK	1514.43	44.9393	40.807	-1
Lowdose_2rad_IMAC_MSA1	11730	1	2	2.8118	274.9	0.247671	0.497666	4.35076	0.001666	S*SPNPFITGLTR	1297.1	0	-1	-1
Lowdose_2rad_IMAC_MSA1	14975	1	4	2.8102	385.7	0.280763	0.529871	-7.0919	0.000136	DLGVKIICGKS*LSVNEMTLS*T*LK	497.377	36.8721	0	0
Lowdose_2rad_IMAC_MSA1	13170	1	2	2.8099	94.6	0.308054	0.555026	7.08126	0.001666	DLSSS*PPGPYGQEMYAFR	1362.01	34.7393	-1	-1
Lowdose_2rad_IMAC_MSA1	7546	1	2	2.8094	703.4	0.387307	0.62234	7.55119	1.6e-05	SNS*FSDER	1540.38	107.22	-1	-1
Lowdose_2rad_IMAC_MSA1	3922	1	2	2.8091	331.5	0.259265	0.509181	6.85808	0.001263	TSES*PSKPGEK	1406.7	101.178	-1	-1
Lowdose_2rad_IMAC_MSA1	3603	1	2	2.8085	178.2	0.238419	0.488282	-19.6433	0.003703	KTES*QKT*KSK	345.672	50.0669	5.4148	-1
Lowdose_2rad_IMAC_MSA1	11873	1	3	2.8071	395.5	0.296106	0.544156	7.33257	0.000331	EMLAS*DDEEDVSSKVEK	1080.57	71.2035	-1	-1
Lowdose_2rad_IMAC_MSA1	11317	1	3	2.805	327.7	0.255829	0.505795	6.9257	0.001441	ETNLDS*LPLVDTHSK	625.425	69.021	-1	-1
Lowdose_2rad_IMAC_MSA1	15082	1	2	2.8017	69.6	0.317022	0.563047	-12.5657	0.002186	RNSVTPLAS*PEPT*KK	794.173	36.9422	124.158	-1
Lowdose_2rad_IMAC_MSA1	14811	1	3	2.8011	244.8	0.297812	0.545722	1.99234	0.000812	MLGQKAT*PPPSPLLSELLK	1679.12	82.1908	-1	-1
Lowdose_2rad_IMAC_MSA1	8672	1	2	2.799	325.5	0.199821	0.447013	3.19804	0.00478	NSQEDS*EDSEDKDVK	2109.86	106.974	-1	-1
Lowdose_2rad_IMAC_MSA1	3755	1	2	2.7947	334.6	0.2869	0.53563	5.21802	0.000534	SSEDGSPT*PGKR	724.651	42.5705	-1	-1
Lowdose_2rad_IMAC_MSA1	3589	1	3	2.7911	232.6	0.276916	0.526228	3.61948	0.001905	LARSS*PEQPRPSTSK	895.424	33.5845	-1	-1
Lowdose_2rad_IMAC_MSA1	6162	1	3	2.7911	311.4	0.22604	0.475437	3.11653	0.003276	SSEPVQHEESIRKPS*PEPR	916.208	26.5379	-1	-1
Lowdose_2rad_IMAC_MSA1	9702	1	2	2.7878	1010.7	0.251811	0.501808	7.22455	0.000294	GAES*PFEEK	-1	-1	-1	-1
Lowdose_2rad_IMAC_MSA1	13572	1	2	2.787	777	0.335127	0.578902	5.67978	6.1e-05	QRIDEFES*M	-1	-1	-1	-1
[truncated: 26,318 more rows]
